# Supplementary material for: Scale-up of the Australian Fans in Training (Aussie-FIT) men’s health behaviour change program: a protocol for a randomised controlled hybrid effectiveness–implementation trial
Source: PubMed Central journal article supplement — BMJ Open. 2023 Oct 25;13(10):e078302. doi: 10.1136/bmjopen-2023-078302 (PMC10603488; doi:10.1136/bmjopen-2023-078302), 2023-10-25
Supplement: bmjopen-2023-078302.draft_revisions.pdf [file bmjopen-2023-078302.draft_revisions.pdf]

# BMJ Open

BMJ Open is committed to open peer review. As part of this commitment we make the peer review history of every article we publish publicly available.

When an article is published we post the peer reviewers' comments and the authors' responses online. We also post the versions of the paper that were used during peer review. These are the versions that the peer review comments apply to.

The versions of the paper that follow are the versions that were submitted during the peer review process. They are not the versions of record or the final published versions. They should not be cited or distributed as the published version of this manuscript.

BMJ Open is an open access journal and the full, final, typeset and author-corrected version of record of the manuscript is available on our site with no access controls, subscription charges or pay-per-view fees (<http://bmjopen.bmj.com>).

If you have any questions on BMJ Open's open peer review process please email [info.bmjopen@bmj.com](mailto:info.bmjopen@bmj.com)

# BMJ Open

## Scale-up of the Australian Fans in Training (Aussie-FIT) men's health behaviour change program: Protocol for a randomised controlled hybrid effectiveness-implementation trial.

|                               |                                                                                                                                                                                                                                                                                                                                                                                                                                                                                                                                                                                                                                                                                                                                                                                                                                                                                                                                                                                                                                                                                                                                                                                                                                                                                                                                                                                                                                                                                                                                                                                                                                                                                                                                                                                                                                                                                                                                                                                                                                                                                                                                                                                                                                                                                                    |
|-------------------------------|----------------------------------------------------------------------------------------------------------------------------------------------------------------------------------------------------------------------------------------------------------------------------------------------------------------------------------------------------------------------------------------------------------------------------------------------------------------------------------------------------------------------------------------------------------------------------------------------------------------------------------------------------------------------------------------------------------------------------------------------------------------------------------------------------------------------------------------------------------------------------------------------------------------------------------------------------------------------------------------------------------------------------------------------------------------------------------------------------------------------------------------------------------------------------------------------------------------------------------------------------------------------------------------------------------------------------------------------------------------------------------------------------------------------------------------------------------------------------------------------------------------------------------------------------------------------------------------------------------------------------------------------------------------------------------------------------------------------------------------------------------------------------------------------------------------------------------------------------------------------------------------------------------------------------------------------------------------------------------------------------------------------------------------------------------------------------------------------------------------------------------------------------------------------------------------------------------------------------------------------------------------------------------------------------|
| Journal:                      | <i>BMJ Open</i>                                                                                                                                                                                                                                                                                                                                                                                                                                                                                                                                                                                                                                                                                                                                                                                                                                                                                                                                                                                                                                                                                                                                                                                                                                                                                                                                                                                                                                                                                                                                                                                                                                                                                                                                                                                                                                                                                                                                                                                                                                                                                                                                                                                                                                                                                    |
| Manuscript ID                 | bmjopen-2023-078302                                                                                                                                                                                                                                                                                                                                                                                                                                                                                                                                                                                                                                                                                                                                                                                                                                                                                                                                                                                                                                                                                                                                                                                                                                                                                                                                                                                                                                                                                                                                                                                                                                                                                                                                                                                                                                                                                                                                                                                                                                                                                                                                                                                                                                                                                |
| Article Type:                 | Protocol                                                                                                                                                                                                                                                                                                                                                                                                                                                                                                                                                                                                                                                                                                                                                                                                                                                                                                                                                                                                                                                                                                                                                                                                                                                                                                                                                                                                                                                                                                                                                                                                                                                                                                                                                                                                                                                                                                                                                                                                                                                                                                                                                                                                                                                                                           |
| Date Submitted by the Author: | 29-Jul-2023                                                                                                                                                                                                                                                                                                                                                                                                                                                                                                                                                                                                                                                                                                                                                                                                                                                                                                                                                                                                                                                                                                                                                                                                                                                                                                                                                                                                                                                                                                                                                                                                                                                                                                                                                                                                                                                                                                                                                                                                                                                                                                                                                                                                                                                                                        |
| Complete List of Authors:     | <p>McDonald, Matthew; Curtin University, Physical Activity and Well-being Research Group, enAble Institute; Curtin University, Curtin School of Population Health</p> <p>Brickley, Bryce; Flinders University, College of Medicine and Public Health, Rural and Remote Health</p> <p>Pavey, Toby; Queensland University of Technology, Exercise and Nutrition Sciences</p> <p>Smith, James A ; Flinders University, College of Medicine and Public Health, Rural and Remote Health</p> <p>Maiorana, Andrew; Curtin University, School of Physiotherapy and Exercise Science; Fiona Stanley Hospital, Exercise Physiology Department</p> <p>McCaffrey, Tracy; Monash University, Nutrition, Dietetics and Food</p> <p>Hillis, Graham; Royal Perth Hospital, Department of Cardiology; The University of Western Australia, School of Medicine and Pharmacology</p> <p>Bonson, Jason; Flinders University, College of Medicine and Public Health, Rural and Remote Health</p> <p>Chih, HuiJun; Curtin University, Curtin School of Population Health</p> <p>Gupta, Himanshu; Flinders University, College of Medicine and Public Health, Rural and Remote Health</p> <p>Holmes, Scarlett; Curtin University, Physical Activity and Well-being Research Group, enAble Institute; Curtin University, Curtin School of Population Health</p> <p>Hunt, Kate; University of Stirling, Institute for Social Marketing</p> <p>Kerr, Deborah; Curtin University, Curtin School of Population Health</p> <p>Kwaśnicka, Dominika ; The University of Melbourne, NHMRC CRE in Digital Technology to Transform Chronic Disease Outcomes, Melbourne School of Population and Global Health; SWPS University of Social Sciences and Humanities, Faculty of Psychology</p> <p>Makate, Marshall; Curtin University Bentley Campus, Health Systems and Health Economics, School of Public Health</p> <p>McVeigh, Joanne; Curtin University, Physical Activity and Well-being Research Group, enAble Institute; Curtin University, Curtin School of Allied Health</p> <p>Moullin, Joanna; Curtin University, Curtin School of Population Health</p> <p>Smith, Brendan; Curtin University, Physical Activity and Well-being Research Group, enAble Institute; Curtin University, Curtin School of Population Health</p> |

1  
2  
3  
4  
5  
6  
7  
8  
9  
10  
11  
12  
13  
14  
15  
16  
17  
18  
19  
20  
21  
22  
23  
24  
25  
26  
27  
28  
29  
30  
31  
32  
33  
34  
35  
36  
37  
38  
39  
40  
41  
42  
43  
44  
45  
46  
47  
48  
49  
50  
51  
52  
53  
54  
55  
56  
57  
58  
59  
60

|           |                                                                                                                                                                                                                                                                          |
|-----------|--------------------------------------------------------------------------------------------------------------------------------------------------------------------------------------------------------------------------------------------------------------------------|
|           | Wharton, Lee; Queensland University of Technology<br>Wharton, Neil; Queensland University of Technology<br>Quested, Eleanor; Curtin University, Physical Activity and Well-being Research Group, enAble Institute; Curtin University, Curtin School of Population Health |
| Keywords: | Obesity, Primary Prevention, PUBLIC HEALTH, Randomized Controlled Trial, CARDIOLOGY                                                                                                                                                                                      |
|           |                                                                                                                                                                                                                                                                          |

SCHOLARONE™  
Manuscripts

1  
2  
3 **1 Scale-up of the Australian Fans in Training (Aussie-FIT) men's health behaviour**  
4  
5 **2 change program: Protocol for a randomised controlled hybrid effectiveness-**  
6  
7 **3 implementation trial.**  
8  
9

10 <sup>a,b</sup>McDonald, M.D., <sup>c</sup>Brickley, B., <sup>d</sup>Pavey, T., <sup>c</sup>Smith, J.A., <sup>a,e,f</sup>Maiorana, A., <sup>g</sup>McCaffrey, T.,  
11  
12 <sup>h,i</sup>Hillis, G., <sup>c</sup>Bonson, J., <sup>b</sup>Chih, H.J., <sup>c</sup>Gupta, H., <sup>b</sup>Holmes, S., <sup>j</sup>Hunt, K., <sup>a,b</sup>Kerr, D.,  
13  
14 <sup>k,l</sup>Kwasnicka, D., <sup>b</sup>Makate, M., <sup>a,e</sup>McVeigh, J., <sup>a,b</sup>Moullin, J.C., <sup>a,b</sup>Smith, B., <sup>d</sup>Wharton, L.,  
15  
16 <sup>d</sup>Wharton, N., & <sup>a,b</sup>Quested, E.  
17  
18

19 <sup>a</sup>*Physical Activity and Well-being Research Group, enAble Institute, Curtin University, Perth,*  
20  
21 *Western Australia;*  
22  
23

24 <sup>b</sup>*Curtin School of Population Health, Curtin University, Perth, Western Australia;*  
25

26 <sup>c</sup>*Flinders University, College of Medicine and Public Health, Rural and Remote Health,*  
27  
28 *Darwin, Northern Territory, Australia*  
29

30 <sup>d</sup>*Queensland University of Technology, Queensland*  
31

32 <sup>e</sup>*Curtin School of Allied Health, Curtin University, Perth, Western Australia;*  
33  
34

35 <sup>f</sup>*Exercise Physiology Department, Fiona Stanley Hospital, Perth, Western Australia;*  
36  
37

38 <sup>g</sup>*Department of Nutrition, Dietetics and Food, Monash University, Notting Hill, Victoria;*  
39

40 <sup>h</sup>*Department of Cardiology, Royal Perth Hospital, Perth, Western Australia, Australia*  
41

42 <sup>i</sup>*Medical School, The University of Western Australia, Perth, Western Australia, Australia*  
43

44 <sup>j</sup>*Institute for Social Marketing and Health, University of Stirling, Stirling, UK*  
45

46 <sup>k</sup>*Faculty of Psychology, SWPS University of Social Sciences and Humanities, Poland*  
47  
48

49 <sup>l</sup>*School of Population and Global Health, University of Melbourne, Melbourne, Australia*  
50  
51

52  
53  
54 **\*Corresponding author: Eleanor Quested, Curtin School of Population Health, Curtin**  
55  
56 **University, Perth, Australia. eleanor.quested@curtin.edu.au**  
57

58 **Version number and date: Protocol version 1, date: 28 March 2023**  
59  
60

1  
2  
3 **26 Abstract**  
4

5 **27 Introduction**  
6

7  
8 28 Improving physical activity and healthy eating is critical for primary and secondary  
9  
10 29 prevention of cardiovascular disease (CVD). Behaviour change programs delivered in  
11  
12 30 sporting clubs can engage men in health behaviour change but are rarely sustained or scaled-  
13  
14 31 up post-trial. Following the success of pilot studies of the Australian Fans in Training  
15  
16 32 (Aussie-FIT) program, a hybrid effectiveness-implementation trial protocol was developed.  
17  
18 33 This protocol outlines methods to: i) establish if Aussie-FIT is effective at supporting men  
19  
20 34 with or at risk of CVD to sustain improvements in moderate-to-vigorous physical activity  
21  
22 35 (primary outcome), diet, and physical and psychological health, and ii) examine the  
23  
24 36 feasibility and utility of implementation strategies to support program adoption,  
25  
26 37 implementation and sustainment.  
27  
28  
29

30  
31 **38 Methods and Analysis**  
32

33 39 A pragmatic multi-State/Territory hybrid type 2 effectiveness-implementation parallel group  
34  
35 40 randomised controlled trial with a 6 month wait-list control arm in Australia. 320 men aged  
36  
37 41 35-75 years with or at-risk of CVD will be recruited. Aussie-FIT involves 12 weekly face-to-  
38  
39 42 face sessions including coach-led interactive education workshops and physical activity  
40  
41 43 delivered in Australian Football League (Western Australia, Northern Territory) and rugby  
42  
43 44 (Queensland) sports club settings. Follow-up measures will be at 3- and 6-months (both  
44  
45 45 groups), and at 12 months to assess maintenance (intervention group only). Implementation  
46  
47 46 outcomes will be reported using the RE-AIM (Reach, Effectiveness, Adoption,  
48  
49 47 Implementation, Maintenance) framework.  
50  
51

52  
53 **48 Ethics and Dissemination**  
54

55  
56 49 This multi-site study has been approved by the lead ethics committees in the lead site's  
57  
58 50 jurisdiction, the South Metropolitan Health Service Human Research Ethics Committee  
59  
60

1  
2  
3 51 (Reference RGS4254) and the West Australian Aboriginal Health Ethics Committee  
4  
5 52 (HREC1221). Findings will be disseminated at academic conferences, peer-reviewed journals  
6  
7  
8 53 and via presentations and reports to stakeholders, including consumers. Findings will inform  
9  
10 54 a blueprint to support the sustainment and scale-up of Aussie-FIT across diverse Australian  
11  
12 55 settings and populations to benefit men's health.  
13  
14  
15 56

### 17 57 **Strengths and Limitations**

- 19 58 • This is the first multi-State/Territory trial of a 'fans in training' style intervention.
- 21 59 • Consumers and other stakeholders contributed to the development of the protocol, in  
22 60 particular recruitment and data collection methods.
- 24 61 • Using a hybrid design will facilitate the concurrent assessment of intervention  
25 62 effectiveness and implementation outcomes, promoting efficient implementation and  
26 63 long-term impact of this evidence-based program.
- 28 64 • Due to the nature of the intervention, participants will not be blinded to treatment  
29 65 allocation.  
30  
31  
32  
33  
34  
35  
36  
37  
38  
39

40 67 **Word count:** 4550  
41  
42  
43  
44  
45  
46  
47  
48  
49  
50  
51  
52  
53  
54  
55  
56  
57  
58  
59  
60

## 68 **Introduction**

69 The cardiovascular benefits of physical activity (PA) and eating a healthy diet are well  
70 established, however, 55% of people who live in Australia do not meet PA guidelines, most  
71 eat an unhealthy diet and 67% are living with overweight or obesity (1). Among those with a  
72 cardiovascular disease (CVD) diagnosis, exercise adherence remains low. Most men with  
73 CVD fail to initiate or sustain health behaviour changes, decreasing quality of life and  
74 increasing risk of future CVD and premature death (2). For instance, only 30% of patients  
75 complete outpatient cardiac rehabilitation, and of those, less than 50% are sufficiently active  
76 12 months after their cardiac event (2).

77 A patient survey showed many patients lack self-management skills and are too dependent on  
78 exercise rehabilitation staff to sustain behaviour changes upon completion of hospital-based  
79 exercise programs (3). Recent estimates suggest that increasing participation in cardiac  
80 rehabilitation in Australia from 30% to 65% would result in \$36 million in healthcare savings,  
81 \$58 million in social and economic benefits, and significantly reduce annual heart attack  
82 admissions (4). To reap these health and economic benefits, new strategies are required to  
83 increase PA adherence and healthy eating in people with or at-risk of CVD. Gender tailored  
84 programs are important, because men and women experience differences in CVDs risks and  
85 occurrences (5). Gender-tailored health behaviour change programs for men have been shown  
86 to be appealing and effective (6).

87 The internationally recognised 'Football Fans in Training' (FFIT) program, and our  
88 Australian adaptation (Aussie-FIT), are effective in engaging men to improve their health  
89 behaviours. FFIT (7) and Aussie-FIT (8) capitalise on men's interest in sport to promote weight  
90 loss via sustained improvements in diet and PA. These structured 12-week programs include  
91 90 minutes of interactive education and group-based PA that aims to develop the skills and

1  
2  
3 92 confidence of participants to self-regulate and maintain behaviour change long-term. Programs  
4  
5 93 are delivered to groups of men by trained coaches in professional sport facilities. The  
6  
7 94 effectiveness and cost-effectiveness of FFIT was established in a Randomised Control Trial  
8  
9 95 (RCT) (7). Mean between group weight lost at 12 months was 5kg, and average weight loss  
10  
11 96 maintenance of 2.9kg was observed in the intervention group 3.5 years post-baseline (9) . FFIT  
12  
13 97 was adapted for the European Fans in Training (EuroFIT) RCT in 5 European countries, where  
14  
15 98 similar findings were revealed (10).

19  
20 99 Kwasnicka et al (2020) demonstrated feasibility of recruitment, engagement, and  
21  
22 100 retention of men living with overweight and obesity, as well as acceptability of the Aussie-FIT  
23  
24 101 intervention and research procedures when delivered at top-tier Australian Football League  
25  
26 102 (AFL) clubs in Western Australia (WA). Promising physical and mental health outcomes were  
27  
28 103 observed (11). In a single-arm feasibility trial in Queensland (QLD), a version of Aussie-FIT  
29  
30 104 adapted for rugby league (League-FIT) has engaged men living with overweight and obesity,  
31  
32 105 and demonstrated promise in supporting positive physical and mental health outcomes (12). In  
33  
34 106 a feasibility study of the Aussie-FIT program undertaken at second-tier AFL clubs for men  
35  
36 107 with CVD, Smith et al (manuscript in preparation) demonstrated feasibility of participant  
37  
38 108 engagement and retention, and acceptability of the intervention and research procedures.  
39  
40 109 However, recruiting men with CVD was challenging (Smith et al., manuscript in progress).  
41  
42 110 Recruitment challenges were likely due to the smaller population of men with CVD (6.5% of  
43  
44 111 men in Australia) (13) compared with 75% of men with overweight and obesity in Australia  
45  
46 112 (14), and the smaller fanbases of second-tier AFL clubs compared to top-tier clubs. The  
47  
48 113 effectiveness of Aussie-FIT remains to be tested, as do implementation strategies designed to  
49  
50 114 improve the adoption, implementation, sustainment and scale-up of the program to reach  
51  
52 115 diverse populations of at-risk men. This multi-State/Territory trial aims to establish the  
53  
54  
55  
56  
57  
58  
59  
60



1  
2  
3 116 effectiveness of the Aussie-FIT intervention for men with or at-risk of CVD, whilst allowing  
4  
5 117 for flexibility with club-size (e.g., top-tier or second-tier) across diverse Australian contexts.  
6  
7

8 118 A recent systematic review of five unique interventions concluded that, whilst FFIT  
9  
10 119 has been successfully scaled up, not all health promotion interventions delivered through  
11  
12 120 professional sport have been successfully scaled up, and thus a greater focus on the potential  
13  
14 121 for scalability of these interventions is required (15). Scalability is the process of increasing  
15  
16 122 the number of implementers (e.g., sports clubs) that are willing to initiate delivery of  
17  
18 123 effective interventions to reach a greater proportion of the target population (16). The  
19  
20 124 potential for intervention scalability is increasingly considered across the research spectrum,  
21  
22 125 rather than solely positioned at the end of a linear research pipeline after effectiveness testing  
23  
24 126 (17). One increasingly common approach to considering implementation and scalability  
25  
26 127 earlier in the research process is the use of hybrid effectiveness-implementation study  
27  
28 128 designs, which allow for the assessment of intervention effectiveness alongside  
29  
30 129 implementation outcomes (18). Implementation outcomes that are important for scalability  
31  
32 130 include program costs, fidelity, adaptability, delivery settings, infrastructure, workforce,  
33  
34 131 reach and acceptability in diverse populations (Milat et al., 2020).  
35  
36  
37  
38  
39  
40

41 132 This trial adopts a hybrid effectiveness-implementation design (19) to examine the  
42  
43 133 effectiveness of Aussie-FIT, and in parallel assess the feasibility and utility of  
44  
45 134 implementation strategies to support program adoption, implementation, sustainment and  
46  
47 135 scalability, using the RE-AIM framework. We pose two research questions to simultaneously  
48  
49 136 address both the intervention and the implementation process aims (20): 1) is the Aussie-FIT  
50  
51 137 program effective in increasing time spent in moderate-to-vigorous physical activity (MVPA);  
52  
53 138 and improving other secondary outcomes among men with or at-risk of CVD at 6 month  
54  
55 139 follow up; and 2) what are the facilitators and barriers to implementation, sustainment and  
56  
57 140 scalability of the Aussie-FIT program?  
58  
59  
60

## 141 **Method**

142 This protocol follows the SPIRIT reporting standards for standard protocol items  
143 (Supplementary File 1) and meets the requirements of the Standards for Reporting  
144 Implementation Studies (StaRI) (20) (Supplementary File 2).

## 145 **Study design**

146 This study is a pragmatic multi-State/Territory Hybrid Type 2 Effectiveness-Implementation  
147 parallel group RCT with a 6 months wait-list control. Follow-up measures are at 3 and 6 months  
148 (primary outcome) post-baseline for both the intervention and control groups; and at 12 months  
149 for the intervention group to assess maintenance (see Figure 1, CONSORT diagram).  
150 Observational implementation outcomes will be reported using the RE-AIM framework (21).  
151 This trial is registered with the Australian New Zealand Clinical Trials Registry  
152 (ACTRN12623000437662).

## 153 **Context**

154 The study is set in and around the capital cities of Darwin (Northern Territory), Perth  
155 (WA), and Brisbane (QLD). These urban centres have distinct contextual characteristics. QLD  
156 and WA make up 20% and 10% of the national population respectively and are far more  
157 populated than the Northern Territory (NT) which makes up less than 1% of the national  
158 population (22). There is significant cultural diversity across each State/Territory; for example,  
159 the proportion of males that identify as Aboriginal and/or Torres Strait Islander in the NT  
160 (26.3%) is considerably higher than in QLD (4.6%) and WA (3.3%) (23). Australian Football  
161 is the most popular sport in WA and the NT, whereas in QLD, Rugby League is most popular  
162 (24).

## 163 **Consumer and Stakeholder Involvement**

1  
2  
3 164 Consumer engagement has been central to the development of the Aussie-FIT program  
4  
5 165 since its ' inception and in previous pilot studies. In preparation for this trial, community  
6  
7 166 advisory groups consisting of consumers (i.e., men with or at-risk of CVD, and former Aussie-  
8  
9  
10 167 FIT participants) and stakeholders (e.g., Aussie-FIT coaches, sporting club or community  
11  
12 168 representatives) have been formed in each State/Territory. These groups include representation  
13  
14  
15 169 of Aboriginal and/or Torres Strait Islander men. The first of these groups met in December  
16  
17 170 2022. Community advisory groups have helped identify potential barriers and enablers of  
18  
19 171 project success and have co-designed responsive implementation strategies. These groups will  
20  
21 172 continue to work in partnership with the research team throughout the lifespan of this project.  
22  
23  
24 173 This will include providing input on culturally appropriate recruitment strategies, retention  
25  
26 174 strategies, involvement in dissemination planning, and if the effectiveness of the intervention  
27  
28 175 is established, providing advice on the sustainment and scalability of Aussie-FIT. The  
29  
30 176 outcomes of our cross-site consumer and stakeholder involvement activities during the trial  
31  
32  
33 177 set-up period, and at later stages in the trial, will be reported in future publications.  
34  
35

## 36 178 **Participants**

### 39 179 Inclusion criteria

40  
41  
42  
43 180 Men aged 35-75 in WA (n=128), NT (n=96) and QLD (n=96) that self-report meeting  
44  
45 181 one or more of the following criteria will be recruited:

46  
47  
48 182 a) CVD diagnosis more than 3 months prior to commencing the study, with no upper  
49  
50 183 limit on length of time since diagnosis; OR

51  
52  
53  
54 184 b)  $\geq 10\%$  risk of CVD, according to the online calculator created by the Australian  
55  
56 185 Chronic Disease Prevention Alliance, that assesses CVD 5-year risk  
57  
58 186 ([www.cvdcheck.org.au/calculator](http://www.cvdcheck.org.au/calculator)); OR  
59  
60

1  
2  
3 187 c) Body mass index  $\geq 28\text{kg/m}^2$ .  
4  
5

6 188 To determine whether they are eligible, potential participants will complete an online  
7  
8  
9 189 form, co-designed with consumers to ensure accessibility for men.  
10

11 190 Participants from non-English speaking backgrounds will be offered interpreters if  
12  
13  
14 191 they wish to participate in the study. Men at risk of harm from PA will be excluded from  
15  
16 192 vigorous PA and will instead undertake light or moderate PA as tolerated (if appropriate  
17  
18 193 based on GP/cardiologist's advice). Where possible men who have not participated in  
19  
20 194 previous Aussie-FIT or League-FIT programs will be prioritised.  
21  
22

### 23 195 *Exclusion criteria*

24  
25  
26 196 Exclusion criteria are: unable to comprehend information or consent documentation;  
27  
28 197 unable to attend most of the weekly sessions, diagnosed with CVD less than 3 months prior to  
29  
30 198 the baseline assessments date; experienced a cardiac event less than 3 months prior to the  
31  
32 199 baseline assessments date; or a medical professional advises against participation (e.g., due to  
33  
34 200 having a cardiac condition not suitable for an exercise trial in the community such as severe  
35  
36 201 aortic stenosis or on-going angina).  
37  
38  
39

### 40 202 **Recruitment**

41  
42  
43  
44 203 Participants will be selected on a 'first come, first served' basis. Men with CVD will be  
45  
46 204 identified from medical records at hospitals (WA only), cardiac rehabilitation programs  
47  
48 205 delivered in hospitals, or in the community, and GP or other primary health care services. Men  
49  
50 206 with or at-risk of CVD will be recruited from community sources including club members'  
51  
52 207 newsletters, traditional/social media, match-day publicity (e.g., announcements, face-to-face  
53  
54 208 recruitment), snowball sampling (25), sport publications, and local health councils. Interested  
55  
56 209 individuals who see the program advertised will be directed to complete a web-based  
57  
58 210 expression of interest (EOI) form. Men who prefer not to use the online EOI form will have  
59  
60

1  
2  
3 211 the opportunity to express their interest, ask questions, check their eligibility, and enrol (if  
4  
5 212 eligible) by contacting the research team directly via phone or email. The online EOI form  
6  
7  
8 213 includes a series of questions to confirm eligibility.  
9

10  
11 214 This trial will host a nested ‘study within a trial’ (SWAT) (26) to examine the utility of  
12  
13 215 a self-directed online enrolment in comparison to a phone call enrolment process (27). Eligible  
14  
15 216 men that complete the online EOI will be randomised via the online form to either immediately  
16  
17 217 book their enrolment appointment online or to receive a call from a researcher to progress their  
18  
19 218 enrolment. The SWAT will evaluate the effectiveness (including cost-effectiveness) of the  
20  
21 219 online approach compared to the standard phone call on enrolment rates (27).  
22  
23  
24  
25

#### 26 220 **Intervention (Aussie-FIT Program)**

27  
28  
29 221 The intervention is described following the Template for Intervention Description and  
30  
31 222 Replication (TIDieR) guidance (28), see Table 1. In brief, the 12, weekly, 90-minute sessions  
32  
33 223 will be delivered to groups of 16 men. One coach and one Accredited Exercise Physiologist  
34  
35 224 (AEP) or equivalent suitable health professional facilitate each group. Coaches and AEPs will  
36  
37 225 be trained by the research team in the core content (PA and diet education), safe exercise for  
38  
39 226 men with or at-risk of CVD, and in the use of principles of motivation and behaviour change.  
40  
41 227 Coaches will lead on the program content delivery and AEPs will be primarily responsible for  
42  
43 228 exercise safety. Practical activities and discussions are designed to help men understand why  
44  
45 229 and how to improve PA (e.g., understanding exercise intensities, safe strength training,  
46  
47 230 decreasing sedentary time) and dietary behaviours (e.g., interpreting food labels, portion sizes,  
48  
49 231 meal planning, eating out), and incorporate behaviour change techniques to support participants  
50  
51 232 to adopt positive health behaviours in their daily lives. A range of PA intensities are promoted,  
52  
53 233 and ball skills and circuit training like those undertaken by professional players but modified  
54  
55 234 to be safe for each man’s limitations (e.g., ball skill drills restricted to walking) undertaken.  
56  
57  
58  
59  
60

1  
2  
3 235 Men are encouraged to self-monitor walking, gradually increasing steps/day throughout the 12-  
4  
5 236 weeks. The AEP will co-deliver the sessions and support the coach by monitoring participants  
6  
7  
8 237 (e.g., blood pressure checks), providing advice on safe exercise and providing first aid, if  
9  
10 238 required. The waitlist control group (another 16 men from each club) will receive the program  
11  
12 239 6 months later.

## 15 240 **Description of the implementation strategy**

16  
17  
18  
19 241 Our consumer advisory groups have supported the development of our implementation  
20  
21 242 strategies in the study set-up phase of this project, full details of which will be reported  
22  
23 243 elsewhere. The implementation study is structured by the RE-AIM framework (Reach,  
24  
25 244 Effectiveness, Adoption, Implementation, and Maintenance) (12).

26  
27  
28  
29 245 Reach: Program recruitment strategies have been co-designed with men with or at risk of  
30  
31 246 cardiovascular disease (CVD). These strategies will be tailored for each State/Territory in  
32  
33 247 consultation with community advisory groups.

34  
35  
36  
37 248 Effectiveness: Individual effectiveness outcomes will be tested via the RCT. Negative or  
38  
39 249 unintended consequences will also be documented.

40  
41  
42  
43 250 Adoption: Clubs will be invited to offer formal commitments to continue deliveries pending  
44  
45 251 further funding opportunities in each State/Territory. An infrastructure and costing model will  
46  
47 252 be developed to support clubs in sustaining the program, and preferences for models of  
48  
49 253 sustained program deliveries will be co-designed with stakeholders.

50  
51  
52  
53 254 Implementation: A comprehensive coach delivery package will support fidelity of program  
54  
55 255 delivery. This package includes 15 hours of training for the coaches, detailed program delivery  
56  
57 256 speaking notes, a timing guide, and rationales. Reusable teaching resources will also be  
58  
59  
60

257 provided to support high-quality delivery. Implementation costs, such as coaches' time for  
258 delivering and preparing for sessions, have been included in the program costing model.

259 Maintenance: Our nested SWAT will evaluate an automated enrolment strategy, designed to  
260 improve program sustainability when fewer resources are available compared to the trial phase.  
261 Resource sharing agreements will be developed, if required, to ensure the intervention  
262 materials can continue to be used post-trial. Sustainability action plans will be developed with  
263 stakeholders, including identifying suitable charities as delivery partners for ongoing program  
264 deliveries. Indications of individual participant-level behaviour change maintenance will be  
265 assessed at 12-months follow-up in the intervention group.

266 Throughout the implementation process, barriers and facilitators to implementation will be  
267 identified (by stakeholders, including consumers and researchers) and targeted in future  
268 modifications to the program. Interviews with stakeholders will be conducted to identify these  
269 barriers and facilitators. Contextual adaptations required for the different States and Territories  
270 will be documented and evaluated. These adaptations will be co-designed with our consumer  
271 advisory groups to ensure contextual fit while preserving fidelity.

## 272 **Blinding and Randomisation**

273 It is not possible to blind participants to condition due to the nature of the intervention.  
274 Data collectors will be blinded as far as possible. Questionnaire data will be completed online,  
275 PA data will be device measured, and participants will be asked not to reveal whether they are  
276 in the intervention or waitlist control arm, when objective measures of weight and blood  
277 pressure are taken.

278 Aligned with the EuroFIT trial, we propose an individual randomisation for each club,  
279 given the FFIT study confirmed that the minimal between-group contamination effects did not

1  
2  
3 280 warrant higher sample size and costs of a cluster trial. (10) Participants from each club (10  
4  
5 281 clubs, 32 participants per club) will be individually randomised (1:1 randomisation, in blocks  
6  
7 282 of 8 to reduce prediction of group allocation). A statistician generated the randomisation list  
8  
9 283 using the RANDBETWEEN (1,2) function using Excel. The statistician, who is not  
10  
11 284 involved in data collection, will not be told if group 1 or group 2 is the intervention arm to  
12  
13 285 assure blindness during the analyses. Following completion of baseline measures, trained  
14  
15 286 research assistants will use opaque, sealed envelopes to assign participants to intervention or  
16  
17 287 control arms.  
18  
19  
20  
21

### 22 288 **Primary outcome: Physical Activity**

23  
24  
25 289 Participants will also be asked to wear an Actigraph GTX9 (ActiGraph LLC, Pensacola,  
26  
27 290 FL) monitor continuously for 7-days on their non-dominant wrist at each data collection time-  
28  
29 291 point to provide a valid and reliable assessment of MVPA (29). The GT9X is a small  
30  
31 292 (3.5 × 3.5 × 1 cm), lightweight (14 g), and waterproof tri-axial accelerometer. The monitors  
32  
33 293 will be initialised to collect data at a 30hz sampling rate. Men will be provided with written  
34  
35 294 instructions for wearing the Actigraph.  
36  
37  
38  
39

### 40 295 **Secondary Outcomes**

41  
42  
43 296 Secondary outcomes include dietary intake, weight, blood pressure, cholesterol, self-  
44  
45 297 esteem, affective states, quality of life, motivation for physical activity, and use of behaviour  
46  
47 298 change strategies targeted in the program. A full list of variables assessed and measurement  
48  
49 299 tools is included in Table 2.  
50  
51  
52

### 53 300 **Implementation Outcomes**

54  
55  
56 301 Implementation outcomes will be reported using the RE-AIM (Reach, Effectiveness,  
57  
58 302 Adoption, Implementation, Maintenance) framework (21). Reach: we will report on the  
59  
60



1  
2  
3 303 number of participants interested and recruited; descriptive statistics of their  
4  
5 304 representativeness, using demographics (e.g., comorbidities, weight, socioeconomic status,  
6  
7 305 ethnicity) of those recruited in each locality; Effectiveness: as per description of intervention  
8  
9 306 outcomes and for effectiveness of implementation outcomes, with qualitative interview  
10  
11 307 findings; Adoption: records of adaptation to the intervention and implementation strategies  
12  
13 308 (between clubs, locations etc); Implementation: fidelity to key content (e.g., educational  
14  
15 309 messages) and functions (e.g., appropriate use of behaviour change techniques) via coding of  
16  
17 310 a subsample of deliveries; adaptations to delivery in each location, ascertained from  
18  
19 311 coach/participant interviews; barriers and facilitators to program implementation from  
20  
21 312 perspectives of coaches, administrators, and participants via interviews; Maintenance:  
22  
23 313 intentions to continue delivering the program (for clubs in this trial) and intentions to initiate  
24  
25 314 program delivery when further funding secured (new clubs),  
26  
27  
28  
29

### 30 315 **Procedure**

31  
32  
33  
34 316 Participants will book an appointment to attend baseline measures (detailed in Table 2)  
35  
36 317 at the football or rugby club. Measurement sessions will be led by a team of trained research  
37  
38 318 assistants. Participants will be asked to complete a survey, which will be presented to them on  
39  
40 319 an iPad using Qualtrics software. The self-administered survey will ask men demographic  
41  
42 320 questions including their age, ethnicity, education, marital status, current employment status,  
43  
44 321 income, and housing status. Weight, height and waist measurements will be taken by a trained  
45  
46 322 researcher. Cholesterol will be checked using a finger-prick test that measures non-fasting  
47  
48 323 cholesterol immediately. Participants will undertake a 24-hour dietary recall using the  
49  
50 324 Intake24, an open-source self-completed computerised dietary recall system based on multiple-  
51  
52 325 pass 24-hour recall. A trained interviewer will assist participants to complete the recall. The  
53  
54 326 self-administered survey will also include items assessing alcohol content, and participants will  
55  
56 327 also be asked to respond to questions assessing their emotions (i.e., positive and negative  
57  
58  
59  
60

1  
2  
3 328 affect), quality of life, self-esteem, motivation to for PA and use of behaviour change strategies  
4  
5 329 taught in Aussie-FIT (automaticity, goal conflict, goal facilitation, coping planning, action  
6  
7  
8 330 planning). Participants are asked to respond on Likert scales of 1-5 or 1-7. Participants can skip  
9  
10 331 questions if they prefer not to answer them. All questions have established psychometric  
11  
12 332 properties and have been used by the research team in studies with similar populations. The  
13  
14 333 questionnaire pack should take less than 30 minutes to complete. A trained research assistant  
15  
16 334 will be available to explain to participants how to complete the survey and to answer any  
17  
18  
19 335 questions they may have during completion of the questionnaire.  
20  
21

22 336 The full assessment process will usually take about an hour. Following randomisation,  
23  
24 337 participants will be informed as to whether they will receive the 12-week intervention  
25  
26 338 immediately (i.e., the intervention arm) or ~6 months later (i.e., the waitlist control group).  
27  
28 339 Once the intervention arm participants have completed the program, the assessment package  
29  
30 340 will be repeated for both the control and intervention groups (3 months post baseline) and then  
31  
32 341 at 6 months post baseline. After the 6 months measures, the waitlist control arm will complete  
33  
34 342 the 12-week program. Finally, the intervention arm will be asked to attend one final assessment,  
35  
36 343 12 months post baseline.  
37  
38  
39  
40  
41

42 344 Where applicable, information regarding the participants' CVD diagnosis will be self-  
43  
44 345 reported or obtained from medical records. Participant attendance at the program will also be  
45  
46 346 recorded. At baseline, participants will be asked to tick yes or no to the question "in the future  
47  
48 347 we may wish to contact you to join a group or individual interview to talk about your  
49  
50 348 experiences in the program. Do you consent for us to contact you? Yes/No". Approximately  
51  
52 349 20 of those who tick 'yes', will be contacted by telephone or email at 6 months and/or 12  
53  
54 350 months, and invited to take part in an interview, which will be conducted on Microsoft Teams  
55  
56 351 videoconference or in person at the football/rugby club (depending on the person's preference).  
57  
58  
59  
60

1  
2  
3 352 Interview questions will be developed in collaboration with PhD candidates and an ethics  
4  
5 353 amendment will be submitted for approval prior to undertaking any interviews. Any changes  
6  
7  
8 354 to protocol will be reported on the study Open Science Framework page (<https://osf.io/ev8px/>).  
9

### 10 11 355 **Treatment of Waitlist Control Arm** 12

13  
14 356 All men will be directed to review evidence-based resources (i.e., Heart Foundation  
15  
16 357 online material) regarding PA and healthy eating after completion of the baseline assessments  
17  
18 358 and men in the waitlist control arm will be invited to participate in Aussie-FIT after the 6-  
19  
20  
21 359 month post baseline assessment.  
22

### 23 24 360 **Data Analyses** 25

26  
27  
28 361 Physical activity data will be downloaded via the ActiLife software (version 6.13.4),  
29  
30 362 where the raw accelerometer data will be processed in R using the GGIR V1.5-21 package  
31  
32 363 ([cran.r-project.org/web/packages/GGIR/index.html](http://cran.r-project.org/web/packages/GGIR/index.html)) (30,31). Physical activity will be  
33  
34 364 estimated from 5-second epochs, with the average daily activity calculated. To be classified as  
35  
36 365 moderate to vigorous physical activity (MVPA) mean acceleration needs to be  $\geq 100$  milli-g  
37  
38 366 (mg) (32). Time in activities lasting at least 1 minute, for which 80% of the activity satisfied  
39  
40 367 the 100 mg threshold criteria, will be calculated. Average acceleration (calculated as the mean  
41  
42 368 acceleration across the 24-hour day as a proxy for the daily volume of PA) and intensity-  
43  
44 369 gradient (as a reflection of the distribution of intensity across the 24-hour day) will be  
45  
46 370 calculated (33,34). We will only include in the analysis those participants with four or more  
47  
48  
49 371 valid days of accelerometry data, and at least 10 hours of wear time each day.  
50  
51  
52

53  
54 372 De-identified objective measurements, questionnaire data and calculated PA data will  
55  
56 373 be exported to Stata software for analyses by an independent biostatistician blinded to the group  
57  
58 374 allocation. Characteristics of the participants will be summarised in mean (and standard  
59  
60

1  
2  
3 375 deviation) or median (and interquartile range) or frequency (and percentage), by treatment  
4  
5 376 groups. Program efficacy will be analysed following the intention-to-treat principle and per-  
6  
7  
8 377 protocol approaches outlined below. Changes in the post-intervention outcomes will be  
9  
10 378 analysed using linear mixed effect regression models whilst controlling for the baseline  
11  
12 379 measures. Sensitivity analyses will also be performed to include covariates such as age, BMI,  
13  
14 380 types of comorbidities in the model to compare the beta coefficient of the models with and  
15  
16 381 without the covariates. If group sizes permit, sub-group analyses will be performed to examine  
17  
18 382 differences in intervention effects on primary and secondary outcomes between i)  
19  
20 383 States/Territories; ii) men diagnosed with and without a CVD diagnosis, iii) men with BMI  
21  
22 384  $\geq 25$  and men with BMI  $< 25$ ; and iii) men who identify as Aboriginal and Torres Strait Islander  
23  
24 385 and men who do not. Further details are available regarding data management and statistical  
25  
26 386 analysis plans on the project page of the Open Science Framework (<https://osf.io/ev8px/>).  
27  
28  
29  
30

### 31 387 **Sample Size Calculations**

32  
33  
34  
35 388 320 men will be recruited: in WA (n=128), NT (n=96) and QLD (n=96), 160 per arm. This  
36  
37 389 estimate is based on observed changes in moderate-to-vigorous PA (MVPA) in the Aussie-FIT  
38  
39 390 pilot (11) and provides 90% power to detect a mean difference of 11-minutes/day (standard  
40  
41 391 deviation:27-minutes/day) of MVPA at 6-months (primary endpoint). The sample size  
42  
43 392 powered on MVPA because PA reduces CVD risk independently, and mitigates other risk  
44  
45 393 factors, such as high blood pressure (35). Change in MVPA of 5 minutes per day is considered  
46  
47 394 the minimum clinically important difference.(36) We allow for a trial attrition rate of 20%.  
48  
49  
50

### 51 395 **Economic Evaluation**

52  
53  
54  
55 396 We will use an economic model of the type developed in the Aussie-FIT pilot (11). The cost-  
56  
57 397 effectiveness analysis will be performed from a health system perspective. Costs will include  
58  
59 398 direct costs associated with the programme (including setting up and promotion) as well as  
60

1  
2  
3 399 self-reported healthcare resource use. In terms of outcome measurement, we will include  
4  
5 400 short-term outcomes that will allow us to look at the cost per clinically relevant change in  
6  
7 401 MVPA (5 minutes per day, (36)) and cost per quality-adjusted life years (QALYs). The  
8  
9 402 QALY is the most widely used approach in economic evaluations for quantifying quality of  
10  
11 403 life gains (37). The EQ-5D-5L questionnaire will be used to assess quality of life (38), which  
12  
13 404 is a standardized measure of health status widely adopted in economic evaluations (39). The  
14  
15 405 EQ-5D-5L responses will be converted into a utility score using the most recent preference-  
16  
17 406 weights generated from an Australian general population sample (40). Self-reported data  
18  
19 407 relating to the number and type of health resources used will be collected at each  
20  
21 408 measurement point. Unit costs for visits to health professionals (GP, practice nurses,  
22  
23 409 physiotherapists etc) will be sourced from the Medical Benefits Schedule (41). Unit costs for  
24  
25 410 any inpatient stays and outpatient visits will be sourced from standard Australian public  
26  
27 411 sector hospital costs (42). Unit costs for prescriptions will be sourced from Pharmaceutical  
28  
29 412 Benefits Schedule (PBS) (43). Given uncertainty around parameters such as unit costs and  
30  
31 413 utility values for calculating QALYs, we will undertake sensitivity analysis to check the  
32  
33 414 robustness of the estimates.  
34  
35  
36  
37  
38  
39

#### 40 **Data Management**

41  
42  
43 416 Locked cabinets in the participating Universities will be used to store hard copy data and no  
44  
45 417 identifying information will be included. A file aligning ID codes with participants' identifying  
46  
47 418 information will be stored on the University server in a password-protected computer file. Only  
48  
49 419 members of the research team will be able to access the physical and electronic data files.  
50  
51  
52  
53

#### 54 **Adverse Events**

55  
56  
57 421 Coaches will be instructed to report any adverse events during the program sessions to  
58  
59 422 the local trial co-ordinator, using a standardised form. In this trial, serious adverse events will  
60

1  
2  
3 423 be defined as a medical event believed by the investigators to be attributable to participation in  
4  
5 424 the Aussie-FIT program, based on the participant's previous medical conditions and clinical  
6  
7  
8 425 presentation. Participants will also be asked to report any adverse events to the coach.  
9

## 10 11 426 **Ethics and Dissemination**

12  
13  
14 427 This multi-site study has been approved by the lead ethics committees in the lead site's  
15  
16 428 jurisdiction, the South Metropolitan Health Service Human Research Ethics Committee  
17  
18 429 (Reference RGS4254) and the West Australian Aboriginal Health Ethics Committee  
19  
20 430 (HREC1221). Reciprocal approvals have been sought from the relevant ethics bodies in the  
21  
22 431 partner site's jurisdictions. All participants will read an electronic participant information sheet  
23  
24 432 and offered a hard or electronic copy to keep. They will be asked to electronically indicate  
25  
26 433 consent before the program enrolment and will be offered a digital or paper copy of their  
27  
28 434 consent form. The study will be disseminated via publication in peer-review journals,  
29  
30 435 presentations at conferences and reports and presentations for consumers and stakeholders. The  
31  
32 436 latter will be co-designed with consumers and stakeholders.  
33  
34  
35  
36  
37

## 38 437 **Discussion**

39  
40  
41 438 In 2022, CVD was the leading cause of burden of disease in Australia, and this burden  
42  
43 439 is higher in males than females (44). Insufficient physical activity and poor diet are key  
44  
45 440 modifiable behavioural CVD risk factors. Pilot and feasibility studies of Aussie-FIT have  
46  
47 441 illustrated that the program is acceptable to men in WA, and feasible to deliver in AFL and  
48  
49 442 West Australian Football League clubs and rugby league clubs in QLD. Scale up of Aussie-  
50  
51 443 FIT in WA, as well as out to other States and Territories creates an opportunity to reduce  
52  
53 444 primary and secondary CVD risk among men with or at risk of CVD via modification of PA  
54  
55 445 and dietary behaviours. Via this hybrid implementation trial, we will determine whether the  
56  
57  
58  
59  
60

1  
2  
3  
4  
5  
6  
7  
8  
9  
10  
11  
12  
13  
14  
15  
16  
17  
18  
19  
20  
21  
22  
23  
24  
25  
26  
27  
28  
29  
30  
31  
32  
33  
34  
35  
36  
37  
38  
39  
40  
41  
42  
43  
44  
45  
46  
47  
48  
49  
50  
51  
52  
53  
54  
55  
56  
57  
58  
59  
60

446 program is effective in improving health and health behaviours in men who take part, and test  
447 strategies to sustain longer term implementation of this program.

448

For peer review only

## 449 **Abbreviations**

450 Aussie-FIT: Australian Fans in Training

451 FFIT: Football Fans in Training

452 BMI: Body mass index

453 CVD: Cardiovascular disease

454 MVPA: Moderate and vigorous physical activity

455 PA: Physical Activity

## 456 **Trial Registration**

457 The trial has been registered with Australian and New Zealand Clinical Trials Registry  
458 (ACTRN12623000437662), prior to recruitment of the first participant (trial registration date  
459 28 March 2023). Results will be written up and published and will be available in an open  
460 access journal or via the Open Science Framework.

## 461 **Funding**

462 This work was supported by a 2021 Behaviour Change Strategic Grant (Award ID number  
463 106534) from the National Heart Foundation of Australia.

## 464 **Author Contributions**

465 EQ, AM, GH, JS, TP, TM, DK, DAK, JM, KH, LW and HG conceived the project and obtained  
466 the project funding. EQ, MDM, AM, KH, JCM, DK, DAK, JC, TP, LW, JS, BB, BS, SH and  
467 MM have made conceptual contributions to project design with opportunities for input from  
468 all authors. Specifically, JCM, MDM, EQ and KH designed the implementation strategies. EQ,  
469 MDM, KH, and AM designed trial recruitment strategies and screening and assessment



1  
2  
3 470 protocols. TP, JMcV, and EQ designed the physical activity data analysis plan. SH, MDM, EQ,  
4  
5 471 DAK, and DK updated the intervention materials, with input from BB, JB, NW, TP, AM. EQ,  
6  
7 472 BS, AM, and MDM prepared the main ethics submission. EQ, BB, JS, and JB prepared the  
8  
9 473 trial procedures and ethics submission for involvement of men who identify as Aboriginal  
10  
11 474 and/or Torres Strait Islanders. MDM, BB, JS, and JB designed the project consumer  
12  
13 475 involvement strategies. JC conducted the power analysis and designed the statistical analysis  
14  
15 476 plan. MM designed the economic evaluation. TP, LW, JS and BB prepared ethics submissions  
16  
17 477 for reciprocal ethics from local State/Territory committees. EQ and MDM drafted the  
18  
19 478 manuscript and all authors read, edited, and approved the final version of the manuscript.  
20  
21  
22

### 23 479 **Competing Interests**

24  
25  
26  
27 480 N/A  
28  
29  
30

### 31 481 **Acknowledgements**

32  
33  
34 482 The research on which this article is based was conducted as part of the Aussie-FIT: Kicking  
35  
36 483 Goals for Men's Heart Health Project. This work was supported by a 2021 Behaviour Change  
37  
38 484 Strategic Grant (Award ID number 106534) from the National Heart Foundation of Australia  
39  
40 485 (contact email Pagw 3research@heartfoundation.org.au). Aussie-FIT builds on the FFIT  
41  
42 486 program, the development and evaluation of which was undertaken by a research team led by  
43  
44 487 the University of Glasgow with funding from various grants including a Medical Research  
45  
46 488 Council (MRC) grant (reference number MC\_UU\_12017/3), a Chief Scientist Office (CSO)  
47  
48 489 grant (reference number CZG/2/504), and a National Institute for Health Research grant  
49  
50 490 (NIHR) (reference number 09/3010/06). The development and evaluation of FFIT was  
51  
52 491 facilitated through partnership working with the Scottish Professional Football League Trust  
53  
54 492 (SPFLT).  
55  
56  
57  
58  
59  
60

493

494 **References**

495

- 496 1. Australian Bureau of Statistics. National Health Survey: first results, 2017–18. 2018.
- 497 2. Rippe JM. Lifestyle Strategies for Risk Factor Reduction, Prevention, and Treatment of  
498 Cardiovascular Disease. *Am J Lifestyle Med.* 2018 Dec 2;13(2):204–12.
- 499 3. Flora PK, McMahon CJ, Locke SR, Brawley LR. Perceiving Cardiac Rehabilitation Staff  
500 as Mainly Responsible for Exercise: A Dilemma for Future Self-Management. *Applied*  
501 *Psychology: Health and Well-Being.* 2018;10(1):108–26.
- 502 4. De Gruyter E, Ford G, Stavreski B. Economic and Social Impact of Increasing Uptake of  
503 Cardiac Rehabilitation Services – A Cost Benefit Analysis. *Heart, Lung and Circulation.*  
504 2016 Feb 1;25(2):175–83.
- 505 5. Walli-Attaei M, Joseph P, Rosengren A, Chow CK, Rangarajan S, Lear SA, et al.  
506 Variations between women and men in risk factors, treatments, cardiovascular disease  
507 incidence, and death in 27 high-income, middle-income, and low-income countries  
508 (PURE): a prospective cohort study. *The Lancet.* 2020 Jul 11;396(10244):97–109.
- 509 6. Sharp P, Spence JC, Bottorff JL, Oliffe JL, Hunt K, Vis-Dunbar M, et al. One small step  
510 for man, one giant leap for men’s health: a meta-analysis of behaviour change  
511 interventions to increase men’s physical activity. *Br J Sports Med.* 2020 Oct  
512 1;54(20):1208–16.
- 513 7. Hunt K, Wyke S, Gray CM, Anderson AS, Brady A, Bunn C, et al. A gender-sensitised  
514 weight loss and healthy living programme for overweight and obese men delivered by

- 1  
2  
3 515 Scottish Premier League football clubs (FFIT): a pragmatic randomised controlled trial.  
4  
5 516 The Lancet. 2014 Apr 5;383(9924):1211–21.  
6  
7  
8  
9 517 8. Qvested E, Kwasnicka D, Thøgersen-Ntoumani C, Gucciardi DF, Kerr DA, Hunt K, et al.  
10  
11 518 Protocol for a gender-sensitised weight loss and healthy living programme for overweight  
12  
13 519 and obese men delivered in Australian football league settings (Aussie-FIT): A feasibility  
14  
15 520 and pilot randomised controlled trial. BMJ Open. 2018 Oct;8(10):e022663.  
16  
17  
18  
19 521 9. Gray CM, Wyke S, Zhang R, Anderson AS, Barry S, Boyer N, et al. Long-term weight  
20  
21 522 loss trajectories following participation in a randomised controlled trial of a weight  
22  
23 523 management programme for men delivered through professional football clubs: a  
24  
25 524 longitudinal cohort study and economic evaluation. International Journal of Behavioral  
26  
27 525 Nutrition and Physical Activity. 2018 Jun 28;15(1):60.  
28  
29  
30  
31 526 10. Wyke S, Bunn C, Andersen E, Silva MN, Nassau F van, McSkimming P, et al. The  
32  
33 527 effect of a programme to improve men’s sedentary time and physical activity: The  
34  
35 528 European Fans in Training (EuroFIT) randomised controlled trial. PLOS Medicine. 2019  
36  
37 529 Feb 5;16(2):e1002736.  
38  
39  
40  
41 530 11. Kwasnicka D, Ntoumanis N, Hunt K, Gray CM, Newton RU, Gucciardi DF, et al. A  
42  
43 531 gender-sensitised weight-loss and healthy living program for men with overweight and  
44  
45 532 obesity in Australian Football League settings (Aussie-FIT): A pilot randomised controlled  
46  
47 533 trial. PLOS Medicine. 2020 Aug 6;17(8):e1003136.  
48  
49  
50  
51 534 12. Pavey T, Wharton L, Polman R, Hunt K, Gray CM, Qvested E. A rugby league  
52  
53 535 weight loss program for men—League-FIT: Preliminary results from a pilot study. Journal  
54  
55 536 of Science and Medicine in Sport. 2022;25:S78-9.  
56  
57  
58  
59  
60

- 1  
2  
3 537 13. Australian Institute of Health and Welfare. Heart, stroke and vascular disease —  
4  
5 538 Australian facts [Internet]. Australian Institute of Health and Welfare; 2023 [cited 2023  
6  
7 539 Apr 23]. Available from: [https://www.aihw.gov.au/reports/heart-stroke-vascular-](https://www.aihw.gov.au/reports/heart-stroke-vascular-diseases/hsvd-facts/contents/about)  
8  
9 540 [diseases/hsvd-facts/contents/about](https://www.aihw.gov.au/reports/heart-stroke-vascular-diseases/hsvd-facts/contents/about)  
10  
11  
12  
13 541 14. Australian Institute of Health and Welfare. Overweight and obesity. 2023; Available  
14  
15 542 from: [https://www.aihw.gov.au/reports/overweight-obesity/overweight-and-](https://www.aihw.gov.au/reports/overweight-obesity/overweight-and-obesity/contents/summary)  
16  
17 543 [obesity/contents/summary](https://www.aihw.gov.au/reports/overweight-obesity/overweight-and-obesity/contents/summary)  
18  
19  
20  
21 544 15. George ES, El Masri A, Kwasnicka D, Romeo A, Cavallin S, Bennie A, et al.  
22  
23 545 Effectiveness of Adult Health Promotion Interventions Delivered Through Professional  
24  
25 546 Sport: Systematic Review and Meta-Analysis. *Sports Med.* 2022 Nov 1;52(11):2637–55.  
26  
27  
28  
29 547 16. Milat AJ, King L, Bauman AE, Redman S. The concept of scalability: increasing the  
30  
31 548 scale and potential adoption of health promotion interventions into policy and practice.  
32  
33 549 *Health Promotion International.* 2013 Sep 1;28(3):285–98.  
34  
35  
36  
37 550 17. Moullin JC, Dickson KS, Stadnick NA, Albers B, Nilsen P, Broder-Fingert S, et al.  
38  
39 551 Ten recommendations for using implementation frameworks in research and practice.  
40  
41 552 *Implement Sci Commun.* 2020 Apr 30;1(1):42.  
42  
43  
44  
45 553 18. Curran GM, Landes SJ, McBain SA, Pyne JM, Smith JD, Fernandez ME, et al.  
46  
47 554 Reflections on 10 years of effectiveness-implementation hybrid studies. *Frontiers in*  
48  
49 555 *Health Services* [Internet]. 2022 [cited 2023 May 6];2. Available from:  
50  
51 556 <https://www.frontiersin.org/articles/10.3389/frhs.2022.1053496>  
52  
53  
54  
55 557 19. Curran GM, Bauer M, Mittman B, Pyne JM, Stetler C. Effectiveness-implementation  
56  
57 558 Hybrid Designs. *Med Care.* 2012 Mar;50(3):217–26.  
58  
59  
60

- 1  
2  
3 559 20. Pinnock H, Barwick M, Carpenter CR, Eldridge S, Grandes G, Griffiths CJ, et al.  
4  
5 560 Standards for Reporting Implementation Studies (StaRI) Statement. *BMJ*. 2017 Mar  
6  
7 561 6;356:i6795.  
8  
9  
10  
11 562 21. Glasgow RE, Vogt TM, Boles SM. Evaluating the public health impact of health  
12  
13 563 promotion interventions: the RE-AIM framework. *Am J Public Health*. 1999  
14  
15 564 Sep;89(9):1322–7.  
16  
17  
18  
19 565 22. National, state and territory population, September 2022 | Australian Bureau of  
20  
21 566 Statistics [Internet]. 2023 [cited 2023 May 26]. Available from:  
22  
23 567 <https://www.abs.gov.au/statistics/people/population/national-state-and-territory->  
24  
25 568 [population/latest-release](https://www.abs.gov.au/statistics/people/population/national-state-and-territory-)  
26  
27  
28  
29 569 23. Australia: Aboriginal and Torres Strait Islander population summary | Australian  
30  
31 570 Bureau of Statistics [Internet]. 2022 [cited 2023 May 26]. Available from:  
32  
33 571 <https://www.abs.gov.au/articles/australia-aboriginal-and-torres-strait-islander-population->  
34  
35 572 [summary](https://www.abs.gov.au/articles/australia-aboriginal-and-torres-strait-islander-population-)  
36  
37  
38  
39 573 24. AusPlay results | Clearinghouse for Sport [Internet]. [cited 2023 May 26]. Available  
40  
41 574 from: <https://www.clearinghouseforsport.gov.au/research/ausplay/results#sportreport>  
42  
43  
44  
45 575 25. Parker, C., Scott, S. and Geddes, A. (2019) Snowball Sampling. SAGE Research  
46  
47 576 Methods Foundations. - References - Scientific Research Publishing [Internet]. [cited 2023  
48  
49 577 May 26]. Available from:  
50  
51 578 [https://www.scirp.org/\(S\(czeh2tfqw2orz553k1w0r45\)\)/reference/referencespapers.aspx?re](https://www.scirp.org/(S(czeh2tfqw2orz553k1w0r45))/reference/referencespapers.aspx?referenceid=3131783)  
52  
53 579 [ferenceid=3131783](https://www.scirp.org/(S(czeh2tfqw2orz553k1w0r45))/reference/referencespapers.aspx?referenceid=3131783)  
54  
55  
56  
57  
58  
59  
60

- 1  
2  
3 580 26. Trial Forge Guidance 1: what is a Study Within A Trial (SWAT)? | Trials | Full Text  
4  
5 581 [Internet]. [cited 2023 May 26]. Available from:  
6  
7 582 <https://trialsjournal.biomedcentral.com/articles/10.1186/s13063-018-2535-5>  
9  
10  
11 583 27. McDonald MD, Moullin JC, Queded E. MRC Hubs for Trials Methodology: The  
12  
13 584 Northern Ireland Hub for Trials Methodology Research, SWAT Store, SWAT 208:  
14  
15 585 Comparative Effectiveness of a Self-Directed Online versus a Phone Call Enrolment  
16  
17 586 Process. [Internet]. [cited 2023 Jun 20]. Available from:  
18  
19 587 [https://www.qub.ac.uk/sites/TheNorthernIrelandNetworkforTrialsMethodologyResearch/F](https://www.qub.ac.uk/sites/TheNorthernIrelandNetworkforTrialsMethodologyResearch/FileStore/Fileupload,1862717,en.pdf)  
20  
21 588 [ileStore/Fileupload,1862717,en.pdf](https://www.qub.ac.uk/sites/TheNorthernIrelandNetworkforTrialsMethodologyResearch/FileStore/Fileupload,1862717,en.pdf).  
22  
23  
24  
25  
26 589 28. Hoffmann TC, Glasziou PP, Boutron I, Milne R, Perera R, Moher D, et al. Better  
27  
28 590 reporting of interventions: template for intervention description and replication (TIDieR)  
29  
30 591 checklist and guide. *BMJ*. 2014 Mar 7;348:g1687.  
31  
32  
33  
34 592 29. Dowd KP, Szeklicki R, Minetto MA, Murphy MH, Polito A, Ghigo E, et al. A  
35  
36 593 systematic literature review of reviews on techniques for physical activity measurement in  
37  
38 594 adults: a DEDIPAC study. *Int J Behav Nutr Phys Act*. 2018 Feb 8;15:15.  
39  
40  
41  
42 595 30. Sabia S, van Hees VT, Shipley MJ, Trenell MI, Hagger-Johnson G, Elbaz A, et al.  
43  
44 596 Association between questionnaire- and accelerometer-assessed physical activity: the role  
45  
46 597 of sociodemographic factors. *Am J Epidemiol*. 2014 Mar 15;179(6):781–90.  
47  
48  
49  
50 598 31. Van Hees VT, Gorzelniak L, Dean León EC, Eder M, Pias M, Taherian S, et al.  
51  
52 599 Separating Movement and Gravity Components in an Acceleration Signal and Implications  
53  
54 600 for the Assessment of Human Daily Physical Activity. Müller M, editor. *PLoS ONE*. 2013  
55  
56 601 Apr 23;8(4):e61691.  
57  
58  
59  
60

- 1  
2  
3 602 32. Hildebrand M, Van Hees VT, Hansen BH, Ekelund U. Age Group Comparability of  
4  
5 603 Raw Accelerometer Output from Wrist- and Hip-Worn Monitors. *Medicine & Science in*  
6  
7 604 *Sports & Exercise*. 2014 Sep;46(9):1816.
- 8  
9  
10  
11 605 33. Migueles JH, Rowlands AV, Huber F, Sabia S, Hees VT van. GGIR: A Research  
12  
13 606 Community–Driven Open Source R Package for Generating Physical Activity and Sleep  
14  
15 607 Outcomes From Multi-Day Raw Accelerometer Data. *Journal for the Measurement of*  
16  
17 608 *Physical Behaviour*. 2019 Sep 1;2(3):188–96.
- 18  
19  
20  
21 609 34. Rowlands AV, Fairclough SJ, Yates T, Edwardson CL, Davies M, Munir F, et al.  
22  
23 610 Activity Intensity, Volume, and Norms: Utility and Interpretation of Accelerometer  
24  
25 611 Metrics. *Medicine & Science in Sports & Exercise*. 2019 Nov;51(11):2410.
- 26  
27  
28  
29 612 35. Mora S, Cook N, Buring JE, Ridker PM, Lee IM. Physical Activity and Reduced Risk  
30  
31 613 of Cardiovascular Events. *Circulation*. 2007 Nov 6;116(19):2110–8.
- 32  
33  
34  
35 614 36. Wrist-worn accelerometers: recommending ~1.0 mg as the minimum clinically  
36  
37 615 important difference (MCID) in daily average acceleration for inactive adults | *British*  
38  
39 616 *Journal of Sports Medicine* [Internet]. [cited 2023 May 26]. Available from:  
40  
41 617 <https://bjsm.bmj.com/content/55/14/814>
- 42  
43  
44  
45 618 37. Drummond MF, Sculpher MJ, Claxton K, Stoddart GL, Torrance GW. *Methods for*  
46  
47 619 *the Economic Evaluation of Health Care Programmes*. Oxford University Press; 2015. 461  
48  
49 620 p.
- 50  
51  
52  
53 621 38. Herdman M, Gudex C, Lloyd A, Janssen MF, Kind P, Parkin D, et al. Development  
54  
55 622 and preliminary testing of the new five-level version of EQ-5D (EQ-5D-5L). *Qual Life*  
56  
57 623 *Res*. 2011 Dec 1;20(10):1727–36.
- 58  
59  
60

- 1  
2  
3 624 39. Brazier J, Ratcliffe J, Saloman J, Tsuchiya A. Measuring and Valuing Health Benefits  
4  
5 625 for Economic Evaluation. Oxford University Press; 2017. 373 p.  
6  
7  
8  
9 626 40. Norman R, Cronin P, Viney R. A pilot discrete choice experiment to explore  
10  
11 627 preferences for EQ-5D-5L health states. *Appl Health Econ Health Policy*. 2013  
12  
13 628 Jun;11(3):287–98.
- 14  
15  
16 629 41. Australian Government Department of Health and Aged Care. MBS Online: Medical  
17  
18 630 Benefits Schedule [Internet]. 2023a [cited 2023 Jul 26]. Available from:  
19  
20 631 <http://www.mbsonline.gov.au/internet/mbsonline/publishing.nsf/Content/Home>  
21  
22  
23  
24 632 42. Independent Health and Aged Care Pricing Authority (IHACPA). Independent Health  
25  
26 633 and Aged Care Pricing Authority. 2023.
- 27  
28  
29  
30 634 43. Australian Government Department of Health and Aged Care, 2023b. Pharmaceutical  
31  
32 635 Benefits Scheme (PBS). 2023b.
- 33  
34  
35  
36 636 44. Australian Institute of Health and Welfare [Internet]. 2022 [cited 2023 Jun 6].  
37  
38 637 Australian Burden of Disease Study 2022, Summary. Available from:  
39  
40 638 [https://www.aihw.gov.au/reports/burden-of-disease/australian-burden-of-disease-study-](https://www.aihw.gov.au/reports/burden-of-disease/australian-burden-of-disease-study-2022/contents/summary#CHD)  
41  
42 639 [2022/contents/summary#CHD](https://www.aihw.gov.au/reports/burden-of-disease/australian-burden-of-disease-study-2022/contents/summary#CHD)  
43  
44  
45  
46 640 45. Thompson ER. Development and Validation of an Internationally Reliable Short-  
47  
48 641 Form of the Positive and Negative Affect Schedule (PANAS). *Journal of Cross-Cultural*  
49  
50 642 *Psychology*. 2007 Mar 1;38(2):227–42.
- 51  
52  
53  
54 643 46. Rosenberg M. Rosenberg self-esteem scale (RSE). Acceptance and commitment  
55  
56 644 therapy Measures package. 1965;61(52)(18).
- 57  
58  
59  
60



- 1  
2  
3 645 47. Rocchi MA, Wilson PM, Sylvester BD, Guerin E, Shi Z, Sweet SN. Toward brief  
4  
5 646 tools assessing motivation for exercise: Rationale and development of a six- and 12-item  
6  
7 647 version of the Behavioral Regulation in Exercise 3 (BREQ3) Questionnaire. *Sport,*  
8  
9 648 *Exercise, and Performance Psychology* [Internet]. 2023 May 18 [cited 2023 Jul 28];  
10  
11 649 Available from: <http://doi.apa.org/getdoi.cfm?doi=10.1037/spy0000321>  
12  
13  
14  
15 650 48. Gardner B, Abraham C, Lally P, de Bruijn GJ. Towards parsimony in habit  
16  
17 651 measurement: Testing the convergent and predictive validity of an automaticity subscale  
18  
19 652 of the Self-Report Habit Index. *International Journal of Behavioral Nutrition and Physical*  
20  
21 653 *Activity*. 2012 Aug 30;9(1):102.  
22  
23  
24  
25 654 49. Penseau J, Tait RI, Johnston DW, Francis JJ, Sniehotta FF. Goal conflict and goal  
26  
27 655 facilitation as predictors of daily accelerometer-assessed physical activity. *Health Psychol.*  
28  
29 656 2013 Dec;32(12):1179–87.  
30  
31  
32  
33 657 50. Sniehotta FF, Schwarzer R, Scholz U, Schüz B. Action planning and coping planning  
34  
35 658 for long-term lifestyle change: theory and assessment. *European Journal of Social*  
36  
37 659 *Psychology*. 2005;35(4):565–76.  
38  
39  
40  
41  
42 660  
43  
44 661  
45  
46  
47  
48  
49  
50  
51  
52  
53  
54  
55  
56  
57  
58  
59  
60

1  
2  
3 **662 Tables and Figures**  
4

5  
6 **663** Table 1 – Intervention description aligned with the Template for Intervention Description  
7  
8  
9 **664** and Replication (TIDieR) guidance  
10

11  
12 **665** Table 2 – Summary of measures used in the Aussie-FIT trial and program evaluation and  
13  
14 **666** time points  
15

16  
17  
18 **667** Table 3 – Intervention content in each of the 12 sessions  
19

20  
21 **668** Figure 1 – Consort diagram of participant flow through the trial  
22  
23  
24  
25  
26  
27  
28  
29  
30  
31  
32  
33  
34  
35  
36  
37  
38  
39  
40  
41  
42  
43  
44  
45  
46  
47  
48  
49  
50  
51  
52  
53  
54  
55  
56  
57  
58  
59  
60

**Table 1.** Intervention description aligned with the Template for Intervention Description and Replication (TIDieR) guidance**TIDieR Checklist Item**

|                             |                                                                                                                                                                                                                                                                                                                                                                                                                                                                                                                                                                                                                                                                                                                                                                                                                                                                                                                                                                                                                                                                                                                                                                                                                                                                                                                                                                                                                                                                                                                                                |
|-----------------------------|------------------------------------------------------------------------------------------------------------------------------------------------------------------------------------------------------------------------------------------------------------------------------------------------------------------------------------------------------------------------------------------------------------------------------------------------------------------------------------------------------------------------------------------------------------------------------------------------------------------------------------------------------------------------------------------------------------------------------------------------------------------------------------------------------------------------------------------------------------------------------------------------------------------------------------------------------------------------------------------------------------------------------------------------------------------------------------------------------------------------------------------------------------------------------------------------------------------------------------------------------------------------------------------------------------------------------------------------------------------------------------------------------------------------------------------------------------------------------------------------------------------------------------------------|
| <b>Why</b>                  | Undertaking sufficient physical activity and healthy eating are critical to prevent people with lived experience of or at-risk of cardiovascular disease (CVD) from experiencing future heart problems. However, most people with or at-risk of CVD fail to initiate or sustain these health behaviours long-term. This increases risks of future heart conditions and premature death. CVD is more common in men, but they are less likely than women to access interventions to help them manage their weight or improve their health behaviours.                                                                                                                                                                                                                                                                                                                                                                                                                                                                                                                                                                                                                                                                                                                                                                                                                                                                                                                                                                                            |
| <b>What<br/>(materials)</b> | Men participating will receive: a wrist worn physical activity monitor, a sports club team shirt, and a participant workbook with educational content about nutrition, physical activity, and health behaviour change (which is also covered in the face-to-face sessions). Coaches will receive a detailed intervention delivery guide and educational resources (e.g., wallet cards to assess food labels) to support delivery of the weekly sessions. Coaches will utilise sports equipment (e.g., AFL and rugby league balls) from their respective clubs. The participant workbook and coach session delivery guides have previously been used in the Aussie-FIT pilot studies. The participant workbook and coach session delivery guide were developed (and educational materials sourced), adapted from resources available from: i) Football Fans in Training program, <a href="http://www.ffit.org.uk">www.ffit.org.uk</a> ; Heart Foundation Australia, <a href="http://www.heartfoundation.org.au">www.heartfoundation.org.au</a> ; Australian Government Department of Health, National Health and Medical Research Council, <a href="http://www.eatforhealth.gov.au">www.eatforhealth.gov.au</a> ; Alcohol Think Again, <a href="http://www.alcoholthinkagain.com.au">www.alcoholthinkagain.com.au</a> ; and Cancer Council WA, <a href="http://www.cancerwa.asn.au">www.cancerwa.asn.au</a> . Minor adaptations have been made to these resources to reflect the target population (men with or at-risk of CVD) and the primary |

---

outcome (physical activity) in this trial, and to incorporate consumer and stakeholder feedback in WA, QLD, and the Northern Territory (NT).

---

**What (procedures)** Participants will attend 12 group sessions at their club that incorporates physical activity, and workshop style education. The education involves practical activities and discussions to help men understand why and how to improve their diet (e.g., interpreting food labels, portion sizes, meal planning, eating out) and physical activity habits (e.g., understanding exercise intensities, safe strength training, decreasing sedentary time). Men will be encouraged to use behaviour change techniques (e.g., self-monitoring, goal setting, and problem solving) to help put the recommendations into practice. Participants take part in physical activity within the sessions that starts off slowly in the initial weeks and gradually builds up over the course of the program. Activities men participate in include ball skills and circuit training similar to that undertaken by Australian football and rugby league players but modified to be safe for each man's abilities (e.g., ball skill drills restricted to walking). Men are encouraged to self-monitor walking, gradually increasing steps/day throughout the 12-weeks.

---

**Who provides** Coaches will be recruited from ten sports clubs in Perth, Darwin, and Brisbane. Aussie-FIT coaches will be already embedded in their respective clubs, knowledgeable about Australian Football or Rugby League, and have experience of leading physical activity or sports coaching sessions. Coaches should have good communication skills and the ability to help foster a supportive atmosphere with camaraderie between participants. Accredited Exercise Physiologists (AEPs), or other suitably qualified/accredited health professionals will act as an assistant coach and co-facilitate program delivery. They will support the coach by undertaking any required health monitoring of participants (e.g., blood pressure checks), provide advice on safe exercise and provide first aid, if

---

---

required. Club coaches and AEPs will be trained by the research team in the core program content (physical activity, nutrition, motivation, behaviour change). The training is delivered face-to-face and comprises approximately 15 hours of interactive learning content and opportunities to practice session deliveries and receive feedback from the research team and peers.

---

**How** The intervention will be delivered face-to-face to groups of approximately 16 men. Coaches are encouraged to utilise a communication style that supports psychological need satisfaction for autonomy, competence, and relatedness in relation to physical activity and eating behaviours.

---

**Where** The program will be delivered in Australian Football (WA and NT) and rugby league (QLD) settings. This will include a suitable space for the educational program component (e.g., indoor clubroom) and access to the pitch/oval for physical activity. In some circumstances, outdoor spaces may be utilised to deliver the educational content and indoor spaces may be used for physical activity (e.g., if there is gym access, or in adverse weather conditions).

---

**When and how much** Participants will attend twelve, weekly, 90-minute sessions. Aussie-FIT encourages gradual increases in moderate to vigorous physical activity levels outside of the weekly sessions in daily life.

---

**Tailoring** The Aussie-FIT sessions and resources are informed by the best available evidence and population recommendations for age and CVD risk management (e.g., Australian guide to healthy eating, physical activity guidelines, and National Heart Foundation recommendations). The program is not prescriptive in terms of physical activity and dietary changes the men make outside of the weekly sessions. Men are supported to self-monitor their diet and physical activity behaviours, then make their own education-informed decisions on setting goals that are relevant to them. Health behaviour change goals that are self-determined are more

---

1  
2 likely to be sustainable. Personalised feedback on goals men set is provided by coaches and peers in weekly sessions throughout  
3  
4 the program. Targeted behaviours for goal setting include portion size control, reduction of sugary drinks and energy dense foods,  
5  
6 reduction in alcohol consumption, gradual increases in physical activity and reduced sedentary time. Men participating in Aussie-  
7  
8 FIT will have varying physical fitness levels and health conditions. Throughout the program AEPs and coaches will modify the  
9  
10 physical activity within the sessions to suit men with differing physical capabilities. AEPs and coaches will be aware of pre-  
11  
12 existing conditions and will interact with and observe participants during the program sessions, and tailor activities as required.  
13  
14  
15  
16  
17  
18  
19  
20  
21  
22  
23  
24  
25  
26  
27  
28  
29  
30  
31  
32  
33  
34  
35  
36  
37  
38  
39  
40  
41  
42  
43  
44  
45  
46

**Table 2.** Summary of measures used in the Aussie-FIT trial and program evaluation and time points

|                                                                                                                                                    |                                                                                                                                                                                                                                                                                                                                                                                                                                                                                                        | Baseline | 3 months | 6 month* |
|----------------------------------------------------------------------------------------------------------------------------------------------------|--------------------------------------------------------------------------------------------------------------------------------------------------------------------------------------------------------------------------------------------------------------------------------------------------------------------------------------------------------------------------------------------------------------------------------------------------------------------------------------------------------|----------|----------|----------|
| Measurement instrument                                                                                                                             |                                                                                                                                                                                                                                                                                                                                                                                                                                                                                                        |          |          |          |
| <b>Objective measures</b> (collected at the measurement sessions at football clubs by members of the research team or trained research assistants) |                                                                                                                                                                                                                                                                                                                                                                                                                                                                                                        |          |          |          |
| PA and sedentary time                                                                                                                              | Participants will also be asked to wear an Actigraph GTX9 (ActiGraph LLC, Pensacola, FL) monitor continuously for 7-days on their non-dominant wrist at each data collection time-point to provide a valid and reliable assessment of PA (30). The GT9X is a small (3.5 × 3.5 × 1 cm), lightweight (14 g), and waterproof tri-axial accelerometer. The monitors will be initialised to collect data at a 30hz sampling rate. Men will be provided with written instructions for wearing the Actigraph. | X        | X        | X        |
| Weight                                                                                                                                             | Weight in kilograms measured with valid and reliable body scale (e.g., Tanita); light clothing, no shoes and empty pockets; assessor blinded to condition                                                                                                                                                                                                                                                                                                                                              | X        | X        | X        |
| Height                                                                                                                                             | Height measured in centimetres using a stadiometer (e.g., Seca); without shoes                                                                                                                                                                                                                                                                                                                                                                                                                         | X        |          |          |
| BMI                                                                                                                                                | Calculated as weight in kilograms divided by the square of height in metres (kg/m <sup>2</sup> )                                                                                                                                                                                                                                                                                                                                                                                                       | X        | X        | X        |
| Waist circumference                                                                                                                                | Waist circumference is measured twice using a tape measure (three times, if the first two measurements differ by 5 mm or more) and the mean of all recorded                                                                                                                                                                                                                                                                                                                                            | X        | X        | X        |

|    |                          |                                                                                           |   |   |
|----|--------------------------|-------------------------------------------------------------------------------------------|---|---|
| 1  |                          |                                                                                           |   |   |
| 2  |                          | measurements calculated. The participant is asked to locate the last rib and iliac crest, |   |   |
| 3  |                          |                                                                                           |   |   |
| 4  |                          | and the measure is performed at the midpoint between these to locate the waist. If the    |   |   |
| 5  |                          |                                                                                           |   |   |
| 6  |                          | man cannot locate his last rib and iliac crest the researcher can ask the man to identify |   |   |
| 7  |                          |                                                                                           |   |   |
| 8  |                          | where his belly button is and the measurement can occur one inch/3cm or width of          |   |   |
| 9  |                          |                                                                                           |   |   |
| 10 |                          | two fingers above where man has indicated. If the first two measurements differ by 5      |   |   |
| 11 |                          |                                                                                           |   |   |
| 12 |                          | mm or more, measure third time.                                                           |   |   |
| 13 |                          |                                                                                           |   |   |
| 14 |                          |                                                                                           |   |   |
| 15 |                          |                                                                                           |   |   |
| 16 | Resting systolic and     | Resting blood pressure measured with a digital blood pressure monitor (Omron HBP-         | X | X |
| 17 |                          |                                                                                           |   |   |
| 18 | diastolic blood pressure | 1320, Milton Keynes, UK) monitor after 5 min sitting still. If measured systolic blood    |   |   |
| 19 |                          |                                                                                           |   |   |
| 20 |                          | pressure is over 150 mmHg and/or measured diastolic blood pressure is over 95             |   |   |
| 21 |                          |                                                                                           |   |   |
| 22 |                          | mmHg, two further measures will be taken and recorded. If blood pressure remains          |   |   |
| 23 |                          |                                                                                           |   |   |
| 24 |                          | high the man will be provided with a letter explaining the circumstances in which         |   |   |
| 25 |                          |                                                                                           |   |   |
| 26 |                          | they had their blood pressure measured and recorded and they will be encouraged to        |   |   |
| 27 |                          |                                                                                           |   |   |
| 28 |                          | consult their GP. A mean will be calculated from the second and third measures. Feet      |   |   |
| 29 |                          |                                                                                           |   |   |
| 30 |                          | flat on the floor, arm free of clothing or wearing loose/thin clothing, cuff at the level |   |   |
| 31 |                          |                                                                                           |   |   |
| 32 |                          | of heart and arm resting, same arm used (non-dominant arm), no talking.                   |   |   |
| 33 |                          |                                                                                           |   |   |
| 34 |                          |                                                                                           |   |   |
| 35 |                          |                                                                                           |   |   |
| 36 | Cholesterol              | Cholesterol will be check using handheld point of care device (Accutrend Plus) that       | X | X |
| 37 |                          |                                                                                           |   |   |
| 38 |                          | measures cholesterol immediately.                                                         |   | X |
| 39 |                          |                                                                                           |   |   |
| 40 |                          |                                                                                           |   |   |
| 41 |                          |                                                                                           |   |   |
| 42 |                          |                                                                                           |   |   |
| 43 |                          |                                                                                           |   |   |
| 44 |                          |                                                                                           |   |   |
| 45 |                          |                                                                                           |   |   |
| 46 |                          |                                                                                           |   |   |



1  
2  
3  
4  
5  
6  
7  
8  
9  
10  
11  
12  
13  
14  
15  
16  
17  
18  
19  
20  
21  
22  
23  
24  
25  
26  
27  
28  
29  
30  
31  
32  
33  
34  
35  
36  
37  
38  
39  
40  
41  
42  
43  
44  
45  
46

**Self-reported measures** (completed at the measurement sessions at football clubs or online in the participant’s own time, depending on preference)

|                              |                                                                                                                                                                                                                               |   |   |   |
|------------------------------|-------------------------------------------------------------------------------------------------------------------------------------------------------------------------------------------------------------------------------|---|---|---|
| Food intake                  | Intake24 is an open-source self-completed computerised dietary recall system based on multiple-pass 24-hour recall. A trained interviewer will assist participants who may request assistance to complete the recall.[14, 15] | X | X | X |
| Positive and negative affect | The Short Form of the positive and negative affect scale (PANAS) (45)                                                                                                                                                         | X | X | X |
| Self-esteem                  | The Rosenberg Self-Esteem (RSE) scale (46)                                                                                                                                                                                    | X | X | X |
| Quality of life              | The health-related quality of life measured using the EQ-5D-5 L (38)                                                                                                                                                          | X | X | X |
| Demographics                 | Age, ethnicity, education, marital status, current employment status, income, housing status                                                                                                                                  | X |   |   |
| Motivation                   | Motivation to be physically active (47)                                                                                                                                                                                       | X | X | X |
| Automaticity                 | The ‘Self-Report Behavioural Automaticity Index’ (48)                                                                                                                                                                         | X | X | X |
| Goal conflict, facilitation  | Goal conflict and goal facilitation scale (49)                                                                                                                                                                                | X | X | X |
| Action and coping planning   | Action planning and copying planning scale (50)                                                                                                                                                                               | X | X | X |

**Self-reported programme evaluation measures**

|    |                          |                                                                                         |   |   |
|----|--------------------------|-----------------------------------------------------------------------------------------|---|---|
| 1  |                          |                                                                                         |   |   |
| 2  | Recruitment              | How participants found out about the programme; programme uptake (number of             | X |   |
| 3  |                          | people who expressed interest; number of people who fit inclusion criteria)             |   |   |
| 4  |                          |                                                                                         |   |   |
| 5  |                          |                                                                                         |   |   |
| 6  | Programme evaluation:    | Attendance to programme sessions and to measurement sessions; fidelity of               |   | X |
| 7  |                          |                                                                                         |   | X |
| 8  | via questionnaires and   | programme delivery; perceptions of effectiveness and acceptability, assessed using      |   |   |
| 9  |                          |                                                                                         |   |   |
| 10 | interviews               | the program evaluation questionnaire, which is adapted from the original Aussie-FIT     |   |   |
| 11 |                          | program. Completed at T2 for first cohort and T3 for second cohort. Interviews with     |   |   |
| 12 |                          | participants, coaches and AEPs will also provide further data on these points.          |   |   |
| 13 |                          |                                                                                         |   |   |
| 14 | Training evaluation: via | Coaches will evaluate the training provided to them by completing the coach training    |   |   |
| 15 |                          |                                                                                         |   |   |
| 16 | questionnaires and       | evaluation questionnaire on completing their training. The interviews will also ask the |   |   |
| 17 |                          |                                                                                         |   |   |
| 18 | interviews               | coaches about their training.                                                           |   |   |
| 19 |                          |                                                                                         |   |   |
| 20 |                          |                                                                                         |   |   |
| 21 |                          |                                                                                         |   |   |
| 22 |                          |                                                                                         |   |   |
| 23 |                          |                                                                                         |   |   |
| 24 |                          |                                                                                         |   |   |

25 *Note.* \* and 12 months, for intervention group only

26  
27  
28  
29  
30  
31  
32  
33  
34  
35  
36  
37  
38 *Table 2.* Intervention content

| 39 Week number and | Motivation and behaviour change | Nutrition component | Physical activity education component | Practical physical |
|--------------------|---------------------------------|---------------------|---------------------------------------|--------------------|
|--------------------|---------------------------------|---------------------|---------------------------------------|--------------------|

| session title           |                                       |                            |                                       | activity          |
|-------------------------|---------------------------------------|----------------------------|---------------------------------------|-------------------|
| <b>Session 1.</b>       | Motivation (identifying and           | Energy balance (intake vs  | Handing out activity monitors and     | Short tour of the |
| Motivation and          | developing higher quality             | output)                    | explaining how to use them            | oval wearing      |
| monitoring progress     | motives); Monitoring progress,        |                            | Walking for wellbeing                 | activity monitors |
|                         | 'your activity' and 'your weight'     |                            | Exercising safely for men with        |                   |
|                         | progress records                      |                            | Cardiovascular disease                |                   |
|                         | <b>Action Point:</b> Track daily step |                            |                                       |                   |
|                         | count and complete food diary to      |                            |                                       |                   |
|                         | bring next week                       |                            |                                       |                   |
| <b>Session 2.</b> Steps | Food diaries compared with            | Explanation of the Heart   | PA for heart health; Baseline step    | Walking around    |
| towards better heart    | healthy eating recommendations        | Foundation five key        | counts determined; Understanding      | the oval          |
| health and setting      | and changes going forward;            | nutrition messages;        | how to increase step count gradually; |                   |
| goals                   | Changing unhealthy                    | Explanation of food groups | Setting step count goals              |                   |
|                         | environmental triggers; Education     | and eating healthier;      |                                       |                   |
|                         | on setting; SMART goals               | Balanced plate of          |                                       |                   |
|                         |                                       | vegetables, wholegrains    |                                       |                   |
|                         |                                       | and protein                |                                       |                   |

|                                                                                      |                                                                                                                                     |                                                                                                                                                                |                                                                                                                                                                                            |                                                                      |
|--------------------------------------------------------------------------------------|-------------------------------------------------------------------------------------------------------------------------------------|----------------------------------------------------------------------------------------------------------------------------------------------------------------|--------------------------------------------------------------------------------------------------------------------------------------------------------------------------------------------|----------------------------------------------------------------------|
| <p><b>Session 3.</b> Planning, food labels and physical activity recommendations</p> | <p>SMART goals review; Action planning and coping planning</p>                                                                      | <p>How to read food labels</p>                                                                                                                                 | <p>PA recommendations, benefits, types and intensities; Pros and cons of PA; Overcoming barriers to being physical inactive; Reviewing steps and thinking about alternative activities</p> | <p>Introduction of warming up, cooling down and aerobic exercise</p> |
| <p><b>Session 4.</b> Reviewing SMART goals, healthy swaps and small changes</p>      | <p>Reviewing goals<br/>SMART goal to reduce junk food<br/>Motivation and staying on track<br/>Importance of support from others</p> | <p>Junk foods impact on heart health; Allowing yourself to be flexible; Healthy snacks and heart healthy food swaps<br/>Methods to reduce junk food intake</p> | <p>Being active every day and sitting less</p>                                                                                                                                             | <p>Aerobic exercise with warm up and cool down</p>                   |
| <p><b>Session 5.</b> Reviewing plans and cutting down on booze</p>                   | <p>Reviewing goals</p>                                                                                                              | <p>Pros and cons of drinking alcohol; Facts about alcohol; Alcohol standard drinks and recommendations</p>                                                     | <p>Reviewing steps and alternative activities</p>                                                                                                                                          | <p>Aerobic exercise with warm up and cool down</p>                   |

1  
2  
3  
4  
5  
6  
7  
8  
9  
10  
11  
12  
13  
14  
15  
16  
17  
18  
19  
20  
21  
22  
23  
24  
25  
26  
27  
28  
29  
30  
31  
32  
33  
34  
35  
36  
37  
38  
39  
40  
41  
42  
43  
44  
45  
46

|                            |                                 |                           |                                          |                      |
|----------------------------|---------------------------------|---------------------------|------------------------------------------|----------------------|
| <b>Session 6. Key</b>      | Five key factors to maintain    |                           | Learning principles of body weight       | Strength exercises   |
| factors to maintain        | health behaviour; Sharing       |                           | strength training; Reviewing steps and   | for major muscle     |
| health behaviour           | experiences on setbacks;        |                           | alternative activities; Introducing      | groups with warm     |
|                            | Introduction to setbacks and    |                           | mobile applications for exercise         | up and cool down     |
|                            | tactics for dealing with them   |                           |                                          |                      |
| <b>Session 7. Progress</b> | Representation of weight loss   |                           | Reviewing steps and alternative          | Warming up and       |
| and staying on track       | achieved and intended; Body     |                           | activities                               | flexibility training |
|                            | composition in men; SMART       |                           | Tips to increase PA, being active        | Strength exercises   |
|                            | goals and weight loss reviewed; |                           | every day and decrease sitting time;     | for major muscle     |
|                            | Reviewing how things are going  |                           | Principles of stretching and flexibility | groups with warm     |
|                            | so far.                         |                           | training                                 | up and cool down     |
|                            | Measurements taken to review    |                           |                                          |                      |
|                            | progress and problem solving;   |                           |                                          |                      |
|                            | Compensatory behaviours;        |                           |                                          |                      |
|                            | Staying on track.               |                           |                                          |                      |
| <b>Session 8. Facts</b>    | Importance of developing eating | Facts about fat, salt and | Reviewing steps and alternative          | Circuit of aerobic,  |
| about fat, salt and        | routines and habits; How to     | sugar for heart health;   | activities                               | strength and         |

|    |                            |                                    |                             |                                     |
|----|----------------------------|------------------------------------|-----------------------------|-------------------------------------|
| 1  |                            |                                    |                             |                                     |
| 2  | sugar                      | choose healthier packet foods      | Healthier fat alternatives; | flexibility                         |
| 3  |                            |                                    |                             |                                     |
| 4  |                            |                                    | Added sugar in drinks       | activities                          |
| 5  |                            |                                    |                             |                                     |
| 6  |                            |                                    |                             | including sport                     |
| 7  |                            |                                    |                             |                                     |
| 8  |                            |                                    |                             | drills                              |
| 9  |                            |                                    |                             |                                     |
| 10 |                            |                                    |                             |                                     |
| 11 | <b>Session 9.</b> Physical | Developing PA habits               | Choosing healthier food     | Reviewing steps and activity review |
| 12 |                            |                                    |                             | Circuit of aerobic,                 |
| 13 | activity habits and        |                                    | choices when having         | strength,                           |
| 14 |                            |                                    |                             |                                     |
| 15 | healthier ways to eat      |                                    | takeaway or eating out      | flexibility                         |
| 16 |                            |                                    |                             |                                     |
| 17 | out                        |                                    |                             | activities                          |
| 18 |                            |                                    |                             |                                     |
| 19 |                            |                                    |                             | including sport                     |
| 20 |                            |                                    |                             |                                     |
| 21 |                            |                                    |                             | drills                              |
| 22 |                            |                                    |                             |                                     |
| 23 |                            |                                    |                             |                                     |
| 24 |                            |                                    |                             |                                     |
| 25 | <b>Session 10.</b> Healthy | Reviewing goals; Triggers for      | Healthy living and busting  | Step count and activity review      |
| 26 |                            |                                    |                             | Circuit of aerobic,                 |
| 27 | cooking at home            | setbacks and how to avoid them     | myths; Healthy cooking      | strength,                           |
| 28 |                            |                                    |                             |                                     |
| 29 |                            | <b>Action Point:</b> Complete food | and food preparation at     | flexibility                         |
| 30 |                            |                                    |                             |                                     |
| 31 |                            | diary to bring next week           | home                        | activities                          |
| 32 |                            |                                    |                             |                                     |
| 33 |                            |                                    |                             | including sport                     |
| 34 |                            |                                    |                             |                                     |
| 35 |                            |                                    |                             | drills                              |
| 36 |                            |                                    |                             |                                     |
| 37 |                            |                                    |                             |                                     |
| 38 |                            |                                    |                             |                                     |
| 39 |                            |                                    |                             |                                     |
| 40 |                            |                                    |                             |                                     |
| 41 |                            |                                    |                             |                                     |
| 42 |                            |                                    |                             |                                     |
| 43 |                            |                                    |                             |                                     |
| 44 |                            |                                    |                             |                                     |
| 45 |                            |                                    |                             |                                     |
| 46 |                            |                                    |                             |                                     |

1  
2  
3  
4  
5  
6  
7  
8  
9  
10  
11  
12  
13  
14  
15  
16  
17  
18  
19  
20  
21  
22  
23  
24  
25  
26  
27  
28  
29  
30  
31  
32  
33  
34  
35  
36  
37  
38  
39  
40  
41  
42  
43  
44  
45  
46

|                                                                          |                                                                                                                     |                                                       |                                            |                                                                             |
|--------------------------------------------------------------------------|---------------------------------------------------------------------------------------------------------------------|-------------------------------------------------------|--------------------------------------------|-----------------------------------------------------------------------------|
| <b>Session 11.</b>                                                       | Revision of food diaries; Revision of eating plans; Behaviour control and staying on track; Revision of SMART goals | PA levels, types, positives and challenges            | Reviewing steps and alternative activities | Circuit of aerobic, strength, flexibility activities including sport drills |
| <b>Session 12.</b> Looking ahead towards maintaining a healthy lifestyle | Reviewing progress throughout the program; Celebrating achievements; Determining steps after the program            | Tips to maintaining nutrition habits for heart health | Tips to maintaining PA habits              | AFL or rugby game                                                           |

**Note.** Session one also includes general introductory content including Aim and overview of the Aussie-FIT program, getting to know each other activities, creating group ground rules and Facebook group sign-ups. Rapport building activities are also incorporated into each weekly sessions

1  
2  
3  
4  
5  
6  
7  
8  
9  
10  
11  
12  
13  
14  
15  
16  
17  
18  
19  
20  
21  
22  
23  
24  
25  
26  
27  
28  
29  
30  
31  
32  
33  
34  
35  
36  
37  
38  
39  
40  
41  
42  
43  
44  
45  
46  
47  
48  
49  
50  
51  
52  
53  
54  
55  
56  
57  
58  
59  
60

For peer review only



Figure 1. Consort diagram of participant flow through the trial

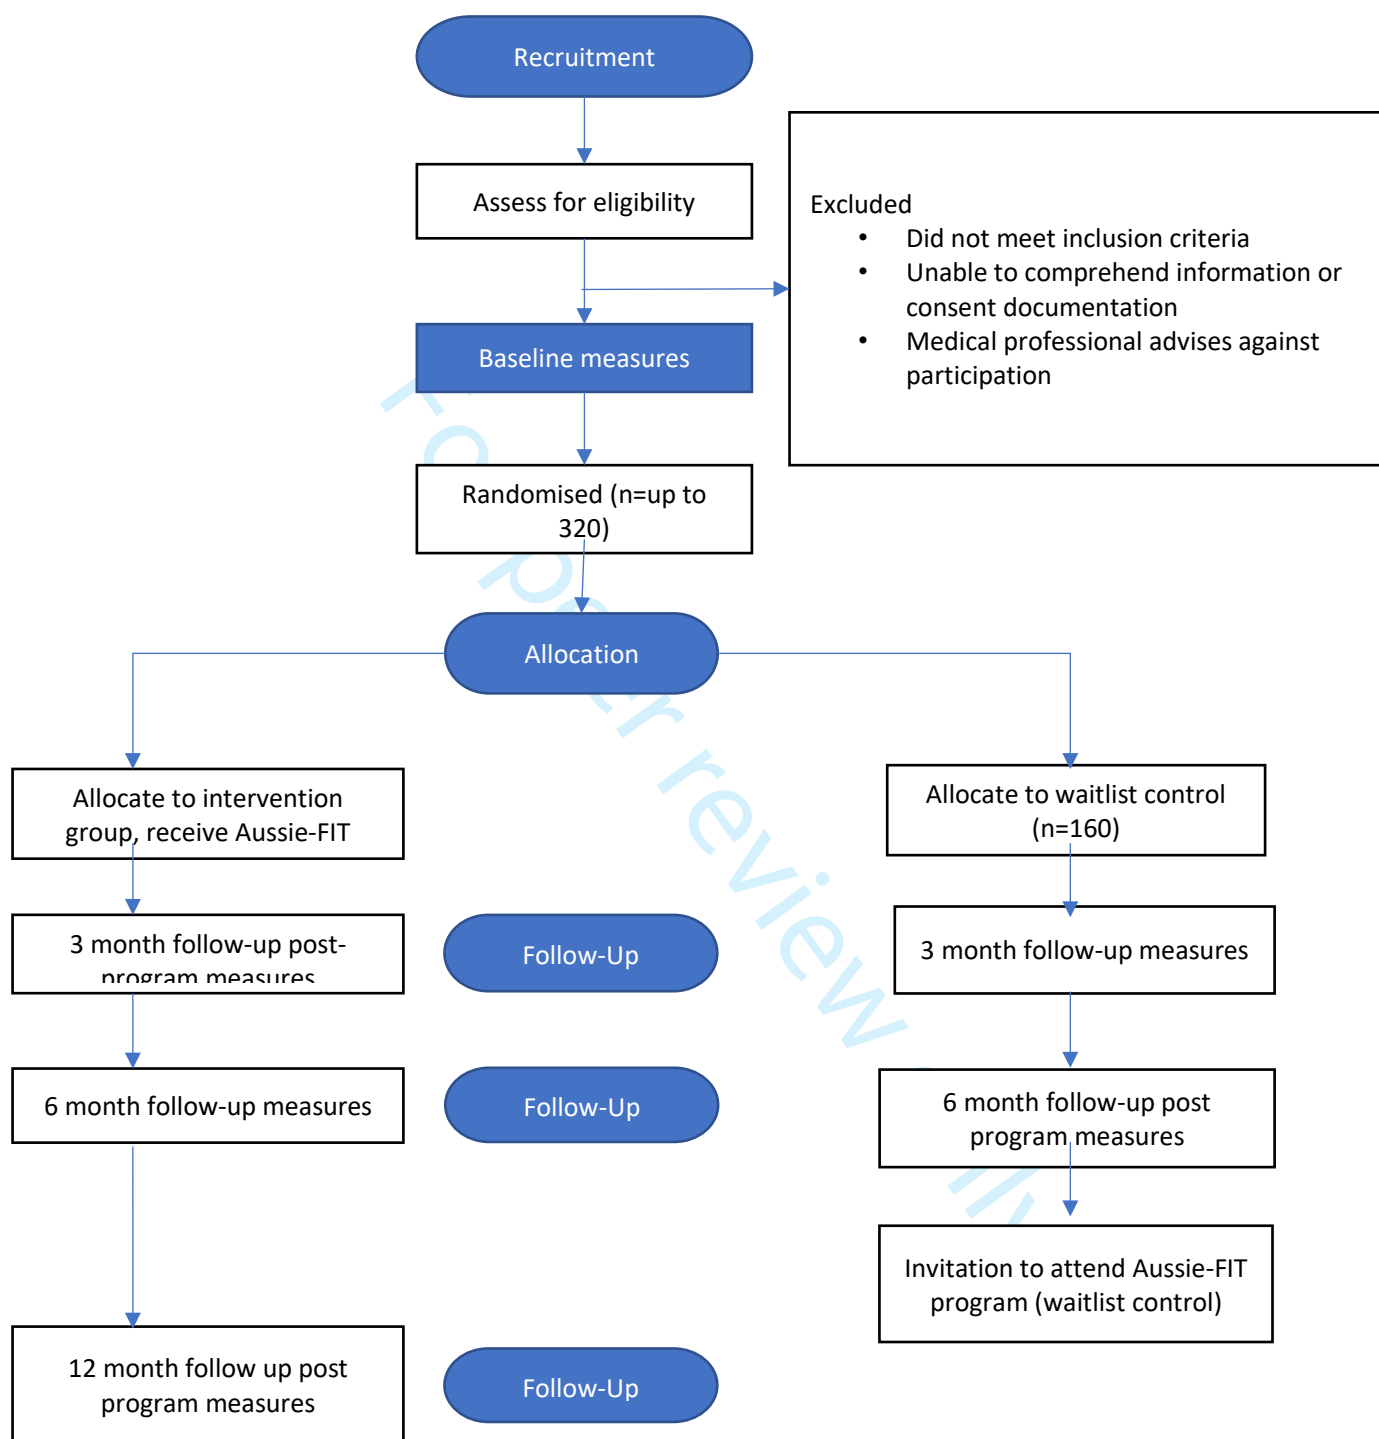

Note. Interviews not included in flow diagram as the interviews are not a part of the randomised control trial per se, but contribute to program evaluation.

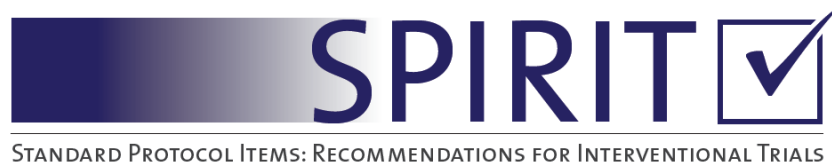

SPIRIT 2013 Checklist: Recommended items to address in a clinical trial protocol and related documents\*

| Section/item                      | Item No | Description                                                                                                                                                                                                                                                                              | Page number |
|-----------------------------------|---------|------------------------------------------------------------------------------------------------------------------------------------------------------------------------------------------------------------------------------------------------------------------------------------------|-------------|
| <b>Administrative information</b> |         |                                                                                                                                                                                                                                                                                          |             |
| Title                             | 1       | Descriptive title identifying the study design, population, interventions, and, if applicable, trial acronym                                                                                                                                                                             | 1           |
| Trial registration                | 2a      | Trial identifier and registry name. If not yet registered, name of intended registry                                                                                                                                                                                                     | 7           |
|                                   | 2b      | All items from the World Health Organization Trial Registration Data Set                                                                                                                                                                                                                 | N/A         |
| Protocol version                  | 3       | Date and version identifier                                                                                                                                                                                                                                                              | 1           |
| Funding                           | 4       | Sources and types of financial, material, and other support                                                                                                                                                                                                                              | 20          |
| Roles and responsibilities        | 5a      | Names, affiliations, and roles of protocol contributors                                                                                                                                                                                                                                  | 1, 20-21    |
|                                   | 5b      | Name and contact information for the trial sponsor                                                                                                                                                                                                                                       | N/A         |
|                                   | 5c      | Role of study sponsor and funders, if any, in study design; collection, management, analysis, and interpretation of data; writing of the report; and the decision to submit the report for publication, including whether they will have ultimate authority over any of these activities | N/A         |
|                                   | 5d      | Composition, roles, and responsibilities of the coordinating centre, steering committee, endpoint adjudication committee, data management team, and other individuals or groups overseeing the trial, if applicable (see Item 21a for data monitoring committee)                         | N/A         |
| <b>Introduction</b>               |         |                                                                                                                                                                                                                                                                                          |             |
| Background and rationale          | 6a      | Description of research question and justification for undertaking the trial, including summary of relevant studies (published and unpublished) examining benefits and harms for each intervention                                                                                       | 4-6         |
|                                   | 6b      | Explanation for choice of comparators                                                                                                                                                                                                                                                    | 16          |

|    |                                                           |     |                                                              |              |
|----|-----------------------------------------------------------|-----|--------------------------------------------------------------|--------------|
| 1  |                                                           |     |                                                              |              |
| 2  | Objectives                                                | 7   | Specific objectives or hypotheses                            | 6            |
| 3  |                                                           |     |                                                              |              |
| 4  |                                                           |     |                                                              |              |
| 5  | Trial design                                              | 8   | Description of trial design including type of trial (eg,     | 7            |
| 6  |                                                           |     | parallel group, crossover, factorial, single group),         |              |
| 7  |                                                           |     | allocation ratio, and framework (eg, superiority,            |              |
| 8  |                                                           |     | equivalence, noninferiority, exploratory)                    |              |
| 9  |                                                           |     |                                                              |              |
| 10 |                                                           |     |                                                              |              |
| 11 | <b>Methods: Participants, interventions, and outcomes</b> |     |                                                              |              |
| 12 |                                                           |     |                                                              |              |
| 13 | Study setting                                             | 9   | Description of study settings (eg, community clinic,         | 7            |
| 14 |                                                           |     | academic hospital) and list of countries where data will be  |              |
| 15 |                                                           |     | collected. Reference to where list of study sites can be     |              |
| 16 |                                                           |     | obtained                                                     |              |
| 17 |                                                           |     |                                                              |              |
| 18 | Eligibility                                               | 10  | Inclusion and exclusion criteria for participants. If        | 8-9          |
| 19 | criteria                                                  |     | applicable, eligibility criteria for study centres and       |              |
| 20 |                                                           |     | individuals who will perform the interventions (eg,          |              |
| 21 |                                                           |     | surgeons, psychotherapists)                                  |              |
| 22 |                                                           |     |                                                              |              |
| 23 |                                                           |     |                                                              |              |
| 24 | Interventions                                             | 11a | Interventions for each group with sufficient detail to allow | 10-11, 31-33 |
| 25 |                                                           |     | replication, including how and when they will be             |              |
| 26 |                                                           |     | administered                                                 |              |
| 27 |                                                           |     |                                                              |              |
| 28 |                                                           |     |                                                              |              |
| 29 |                                                           | 11b | Criteria for discontinuing or modifying allocated            | N/A          |
| 30 |                                                           |     | interventions for a given trial participant (eg, drug dose   |              |
| 31 |                                                           |     | change in response to harms, participant request, or         |              |
| 32 |                                                           |     | improving/worsening disease)                                 |              |
| 33 |                                                           |     |                                                              |              |
| 34 |                                                           | 11c | Strategies to improve adherence to intervention protocols,   | 14-15        |
| 35 |                                                           |     | and any procedures for monitoring adherence (eg, drug        |              |
| 36 |                                                           |     | tablet return, laboratory tests)                             |              |
| 37 |                                                           |     |                                                              |              |
| 38 |                                                           |     |                                                              |              |
| 39 |                                                           | 11d | Relevant concomitant care and interventions that are         | N/A          |
| 40 |                                                           |     | permitted or prohibited during the trial                     |              |
| 41 |                                                           |     |                                                              |              |
| 42 | Outcomes                                                  | 12  | Primary, secondary, and other outcomes, including the        | 13-14        |
| 43 |                                                           |     | specific measurement variable (eg, systolic blood            |              |
| 44 |                                                           |     | pressure), analysis metric (eg, change from baseline, final  |              |
| 45 |                                                           |     | value, time to event), method of aggregation (eg, median,    |              |
| 46 |                                                           |     | proportion), and time point for each outcome. Explanation    |              |
| 47 |                                                           |     | of the clinical relevance of chosen efficacy and harm        |              |
| 48 |                                                           |     | outcomes is strongly recommended                             |              |
| 49 |                                                           |     |                                                              |              |
| 50 |                                                           |     |                                                              |              |
| 51 | Participant                                               | 13  | Time schedule of enrolment, interventions (including any     | 14-15        |
| 52 | timeline                                                  |     | run-ins and washouts), assessments, and visits for           |              |
| 53 |                                                           |     | participants. A schematic diagram is highly recommended      |              |
| 54 |                                                           |     | (see Figure)                                                 |              |
| 55 |                                                           |     |                                                              |              |
| 56 |                                                           |     |                                                              |              |
| 57 |                                                           |     |                                                              |              |
| 58 |                                                           |     |                                                              |              |
| 59 |                                                           |     |                                                              |              |
| 60 |                                                           |     |                                                              |              |

|   |             |    |                                                                                                                                                                                       |      |
|---|-------------|----|---------------------------------------------------------------------------------------------------------------------------------------------------------------------------------------|------|
| 1 |             |    |                                                                                                                                                                                       |      |
| 2 | Sample size | 14 | Estimated number of participants needed to achieve study objectives and how it was determined, including clinical and statistical assumptions supporting any sample size calculations | 17   |
| 3 |             |    |                                                                                                                                                                                       |      |
| 4 |             |    |                                                                                                                                                                                       |      |
| 5 |             |    |                                                                                                                                                                                       |      |
| 6 |             |    |                                                                                                                                                                                       |      |
| 7 | Recruitment | 15 | Strategies for achieving adequate participant enrolment to reach target sample size                                                                                                   | 9-10 |
| 8 |             |    |                                                                                                                                                                                       |      |
| 9 |             |    |                                                                                                                                                                                       |      |

### Methods: Assignment of interventions (for controlled trials)

#### Allocation:

|    |                                  |     |                                                                                                                                                                                                                                                                                                                                                          |       |
|----|----------------------------------|-----|----------------------------------------------------------------------------------------------------------------------------------------------------------------------------------------------------------------------------------------------------------------------------------------------------------------------------------------------------------|-------|
| 14 | Sequence generation              | 16a | Method of generating the allocation sequence (eg, computer-generated random numbers), and list of any factors for stratification. To reduce predictability of a random sequence, details of any planned restriction (eg, blocking) should be provided in a separate document that is unavailable to those who enrol participants or assign interventions | 12-13 |
| 15 |                                  |     |                                                                                                                                                                                                                                                                                                                                                          |       |
| 16 |                                  |     |                                                                                                                                                                                                                                                                                                                                                          |       |
| 17 |                                  |     |                                                                                                                                                                                                                                                                                                                                                          |       |
| 18 |                                  |     |                                                                                                                                                                                                                                                                                                                                                          |       |
| 19 |                                  |     |                                                                                                                                                                                                                                                                                                                                                          |       |
| 20 |                                  |     |                                                                                                                                                                                                                                                                                                                                                          |       |
| 21 |                                  |     |                                                                                                                                                                                                                                                                                                                                                          |       |
| 22 |                                  |     |                                                                                                                                                                                                                                                                                                                                                          |       |
| 23 |                                  |     |                                                                                                                                                                                                                                                                                                                                                          |       |
| 24 | Allocation concealment mechanism | 16b | Mechanism of implementing the allocation sequence (eg, central telephone; sequentially numbered, opaque, sealed envelopes), describing any steps to conceal the sequence until interventions are assigned                                                                                                                                                | 13    |
| 25 |                                  |     |                                                                                                                                                                                                                                                                                                                                                          |       |
| 26 |                                  |     |                                                                                                                                                                                                                                                                                                                                                          |       |
| 27 |                                  |     |                                                                                                                                                                                                                                                                                                                                                          |       |
| 28 |                                  |     |                                                                                                                                                                                                                                                                                                                                                          |       |
| 29 |                                  |     |                                                                                                                                                                                                                                                                                                                                                          |       |
| 30 | Implementation                   | 16c | Who will generate the allocation sequence, who will enrol participants, and who will assign participants to interventions                                                                                                                                                                                                                                | 13-14 |
| 31 |                                  |     |                                                                                                                                                                                                                                                                                                                                                          |       |
| 32 |                                  |     |                                                                                                                                                                                                                                                                                                                                                          |       |
| 33 |                                  |     |                                                                                                                                                                                                                                                                                                                                                          |       |
| 34 | Blinding (masking)               | 17a | Who will be blinded after assignment to interventions (eg, trial participants, care providers, outcome assessors, data analysts), and how                                                                                                                                                                                                                | 12    |
| 35 |                                  |     |                                                                                                                                                                                                                                                                                                                                                          |       |
| 36 |                                  |     |                                                                                                                                                                                                                                                                                                                                                          |       |
| 37 |                                  |     |                                                                                                                                                                                                                                                                                                                                                          |       |
| 38 |                                  |     |                                                                                                                                                                                                                                                                                                                                                          |       |
| 39 |                                  | 17b | If blinded, circumstances under which unblinding is permissible, and procedure for revealing a participant's allocated intervention during the trial                                                                                                                                                                                                     | N/A   |
| 40 |                                  |     |                                                                                                                                                                                                                                                                                                                                                          |       |
| 41 |                                  |     |                                                                                                                                                                                                                                                                                                                                                          |       |
| 42 |                                  |     |                                                                                                                                                                                                                                                                                                                                                          |       |

### Methods: Data collection, management, and analysis

|    |                         |     |                                                                                                                                                                                                                                                                                                                                                                                                              |              |
|----|-------------------------|-----|--------------------------------------------------------------------------------------------------------------------------------------------------------------------------------------------------------------------------------------------------------------------------------------------------------------------------------------------------------------------------------------------------------------|--------------|
| 45 | Data collection methods | 18a | Plans for assessment and collection of outcome, baseline, and other trial data, including any related processes to promote data quality (eg, duplicate measurements, training of assessors) and a description of study instruments (eg, questionnaires, laboratory tests) along with their reliability and validity, if known. Reference to where data collection forms can be found, if not in the protocol | 13-16, 35-38 |
| 46 |                         |     |                                                                                                                                                                                                                                                                                                                                                                                                              |              |
| 47 |                         |     |                                                                                                                                                                                                                                                                                                                                                                                                              |              |
| 48 |                         |     |                                                                                                                                                                                                                                                                                                                                                                                                              |              |
| 49 |                         |     |                                                                                                                                                                                                                                                                                                                                                                                                              |              |
| 50 |                         |     |                                                                                                                                                                                                                                                                                                                                                                                                              |              |
| 51 |                         |     |                                                                                                                                                                                                                                                                                                                                                                                                              |              |
| 52 |                         |     |                                                                                                                                                                                                                                                                                                                                                                                                              |              |
| 53 |                         |     |                                                                                                                                                                                                                                                                                                                                                                                                              |              |
| 54 |                         |     |                                                                                                                                                                                                                                                                                                                                                                                                              |              |
| 55 |                         |     |                                                                                                                                                                                                                                                                                                                                                                                                              |              |
| 56 |                         | 18b | Plans to promote participant retention and complete follow-up, including list of any outcome data to be collected for participants who discontinue or deviate from intervention protocols                                                                                                                                                                                                                    |              |
| 57 |                         |     |                                                                                                                                                                                                                                                                                                                                                                                                              |              |
| 58 |                         |     |                                                                                                                                                                                                                                                                                                                                                                                                              |              |
| 59 |                         |     |                                                                                                                                                                                                                                                                                                                                                                                                              |              |
| 60 |                         |     |                                                                                                                                                                                                                                                                                                                                                                                                              |              |

|    |                                 |     |                                                                |       |
|----|---------------------------------|-----|----------------------------------------------------------------|-------|
| 1  |                                 |     |                                                                |       |
| 2  | Data                            | 19  | Plans for data entry, coding, security, and storage,           | 17    |
| 3  | management                      |     | including any related processes to promote data quality        |       |
| 4  |                                 |     | (eg, double data entry; range checks for data values).         |       |
| 5  |                                 |     | Reference to where details of data management                  |       |
| 6  |                                 |     | procedures can be found, if not in the protocol                |       |
| 7  |                                 |     |                                                                |       |
| 8  | Statistical                     | 20a | Statistical methods for analysing primary and secondary        | 16-17 |
| 9  | methods                         |     | outcomes. Reference to where other details of the              |       |
| 10 |                                 |     | statistical analysis plan can be found, if not in the protocol |       |
| 11 |                                 |     |                                                                |       |
| 12 |                                 |     |                                                                |       |
| 13 |                                 | 20b | Methods for any additional analyses (eg, subgroup and          | 17    |
| 14 |                                 |     | adjusted analyses)                                             |       |
| 15 |                                 |     |                                                                |       |
| 16 |                                 |     |                                                                |       |
| 17 |                                 |     |                                                                |       |
| 18 |                                 | 20c | Definition of analysis population relating to protocol non-    | 17    |
| 19 |                                 |     | adherence (eg, as randomised analysis), and any                |       |
| 20 |                                 |     | statistical methods to handle missing data (eg, multiple       |       |
| 21 |                                 |     | imputation)                                                    |       |
| 22 |                                 |     |                                                                |       |
| 23 | <b>Methods: Monitoring</b>      |     |                                                                |       |
| 24 |                                 |     |                                                                |       |
| 25 | Data                            | 21a | Composition of data monitoring committee (DMC);                | N/A   |
| 26 | monitoring                      |     | summary of its role and reporting structure; statement of      |       |
| 27 |                                 |     | whether it is independent from the sponsor and competing       |       |
| 28 |                                 |     | interests; and reference to where further details about its    |       |
| 29 |                                 |     | charter can be found, if not in the protocol. Alternatively,   |       |
| 30 |                                 |     | an explanation of why a DMC is not needed                      |       |
| 31 |                                 |     |                                                                |       |
| 32 |                                 |     |                                                                |       |
| 33 |                                 | 21b | Description of any interim analyses and stopping               | N/A   |
| 34 |                                 |     | guidelines, including who will have access to these interim    |       |
| 35 |                                 |     | results and make the final decision to terminate the trial     |       |
| 36 |                                 |     |                                                                |       |
| 37 |                                 |     |                                                                |       |
| 38 | Harms                           | 22  | Plans for collecting, assessing, reporting, and managing       | 18    |
| 39 |                                 |     | solicited and spontaneously reported adverse events and        |       |
| 40 |                                 |     | other unintended effects of trial interventions or trial       |       |
| 41 |                                 |     | conduct                                                        |       |
| 42 |                                 |     |                                                                |       |
| 43 | Auditing                        | 23  | Frequency and procedures for auditing trial conduct, if        | N/A   |
| 44 |                                 |     | any, and whether the process will be independent from          |       |
| 45 |                                 |     | investigators and the sponsor                                  |       |
| 46 |                                 |     |                                                                |       |
| 47 |                                 |     |                                                                |       |
| 48 | <b>Ethics and dissemination</b> |     |                                                                |       |
| 49 |                                 |     |                                                                |       |
| 50 | Research                        | 24  | Plans for seeking research ethics committee/institutional      | 18-19 |
| 51 | ethics                          |     | review board (REC/IRB) approval                                |       |
| 52 | approval                        |     |                                                                |       |
| 53 |                                 |     |                                                                |       |
| 54 | Protocol                        | 25  | Plans for communicating important protocol modifications       | 16    |
| 55 | amendments                      |     | (eg, changes to eligibility criteria, outcomes, analyses) to   |       |
| 56 |                                 |     | relevant parties (eg, investigators, REC/IRBs, trial           |       |
| 57 |                                 |     | participants, trial registries, journals, regulators)          |       |
| 58 |                                 |     |                                                                |       |
| 59 |                                 |     |                                                                |       |
| 60 |                                 |     |                                                                |       |

|    |                   |     |                                                                 |       |
|----|-------------------|-----|-----------------------------------------------------------------|-------|
| 1  |                   |     |                                                                 |       |
| 2  | Consent or        | 26a | Who will obtain informed consent or assent from potential       | 14    |
| 3  | assent            |     | trial participants or authorised surrogates, and how (see       |       |
| 4  |                   |     | Item 32)                                                        |       |
| 5  |                   |     |                                                                 |       |
| 6  |                   | 26b | Additional consent provisions for collection and use of         | N/A   |
| 7  |                   |     | participant data and biological specimens in ancillary          |       |
| 8  |                   |     | studies, if applicable                                          |       |
| 9  |                   |     |                                                                 |       |
| 10 | Confidentiality   | 27  | How personal information about potential and enrolled           | 14-16 |
| 11 |                   |     | participants will be collected, shared, and maintained in       |       |
| 12 |                   |     | order to protect confidentiality before, during, and after the  |       |
| 13 |                   |     | trial                                                           |       |
| 14 |                   |     |                                                                 |       |
| 15 |                   |     |                                                                 |       |
| 16 | Declaration of    | 28  | Financial and other competing interests for principal           | 21    |
| 17 | interests         |     | investigators for the overall trial and each study site         |       |
| 18 |                   |     |                                                                 |       |
| 19 | Access to data    | 29  | Statement of who will have access to the final trial dataset,   | 18    |
| 20 |                   |     | and disclosure of contractual agreements that limit such        |       |
| 21 |                   |     | access for investigators                                        |       |
| 22 |                   |     |                                                                 |       |
| 23 |                   |     |                                                                 |       |
| 24 | Ancillary and     | 30  | Provisions, if any, for ancillary and post-trial care, and for  | N/A   |
| 25 | post-trial care   |     | compensation to those who suffer harm from trial                |       |
| 26 |                   |     | participation                                                   |       |
| 27 |                   |     |                                                                 |       |
| 28 | Dissemination     | 31a | Plans for investigators and sponsor to communicate trial        | 19    |
| 29 | policy            |     | results to participants, healthcare professionals, the          |       |
| 30 |                   |     | public, and other relevant groups (eg, via publication,         |       |
| 31 |                   |     | reporting in results databases, or other data sharing           |       |
| 32 |                   |     | arrangements), including any publication restrictions           |       |
| 33 |                   |     |                                                                 |       |
| 34 |                   |     |                                                                 |       |
| 35 |                   | 31b | Authorship eligibility guidelines and any intended use of       | N/A   |
| 36 |                   |     | professional writers                                            |       |
| 37 |                   |     |                                                                 |       |
| 38 |                   | 31c | Plans, if any, for granting public access to the full protocol, | N/A   |
| 39 |                   |     | participant-level dataset, and statistical code                 |       |
| 40 |                   |     |                                                                 |       |
| 41 |                   |     |                                                                 |       |
| 42 | <b>Appendices</b> |     |                                                                 |       |
| 43 |                   |     |                                                                 |       |
| 44 | Informed          | 32  | Model consent form and other related documentation              | N/A   |
| 45 | consent           |     | given to participants and authorised surrogates                 |       |
| 46 | materials         |     |                                                                 |       |
| 47 |                   |     |                                                                 |       |
| 48 | Biological        | 33  | Plans for collection, laboratory evaluation, and storage of     | N/A   |
| 49 | specimens         |     | biological specimens for genetic or molecular analysis in       |       |
| 50 |                   |     | the current trial and for future use in ancillary studies, if   |       |
| 51 |                   |     | applicable                                                      |       |
| 52 |                   |     |                                                                 |       |
| 53 |                   |     |                                                                 |       |

\*It is strongly recommended that this checklist be read in conjunction with the SPIRIT 2013 Explanation & Elaboration for important clarification on the items. Amendments to the protocol should be tracked and dated. The SPIRIT checklist is copyrighted by the SPIRIT Group under the Creative Commons "[Attribution-NonCommercial-NoDerivs 3.0 Unported](https://creativecommons.org/licenses/by-nc-nd/3.0/)" license.

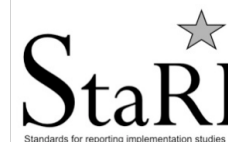

## Supplementary File 2.

### Standards for Reporting Implementation Studies: the StaRI checklist for completion

The StaRI standard should be referenced as: Pinnock H, Barwick M, Carpenter C, Eldridge S, Grandes G, Griffiths CJ, Rycroft-Malone J, Meissner P, Murray E, Patel A, Sheikh A, Taylor SJC for the StaRI Group. Standards for Reporting Implementation Studies ([StaRI statement](#)). *BMJ* 2017;356:i6795

The detailed Explanation and Elaboration document, which provides the rationale and exemplar text for all these items is: Pinnock H, Barwick M, Carpenter C, Eldridge S, Grandes G, Griffiths C, Rycroft-Malone J, Meissner P, Murray E, Patel A, Sheikh A, Taylor S, for the StaRI group. Standards for Reporting Implementation Studies ([StaRI Explanation and Elaboration document](#)). *BMJ Open* 2017 2017;7:e013318

Notes: A key concept of the StaRI standards is the dual strands of describing, on the one hand, the implementation strategy and, on the other, the clinical, healthcare, or public health intervention that is being implemented. These strands are represented as two columns in the checklist.

The primary focus of implementation science is the implementation strategy (column 1) and the expectation is that this will always be completed.

The evidence about the impact of the intervention on the targeted population should always be considered (column 2) and either health outcomes reported or robust evidence cited to support a known beneficial effect of the intervention on the health of individuals or populations.

The StaRI standards refers to the broad range of study designs employed in implementation science. Authors should refer to other reporting standards for advice on reporting specific methodological features. Conversely, whilst all items are worthy of consideration, not all items will be applicable to, or feasible within every study.

| Checklist item            | Reported on page # | Implementation Strategy                                                  | Reported on page # | Intervention                                                                                                                                                                                                                |
|---------------------------|--------------------|--------------------------------------------------------------------------|--------------------|-----------------------------------------------------------------------------------------------------------------------------------------------------------------------------------------------------------------------------|
|                           |                    | “Implementation strategy” refers to how the intervention was implemented |                    | “Intervention” refers to the healthcare or public health intervention that is being implemented.                                                                                                                            |
| <b>Title and abstract</b> |                    |                                                                          |                    |                                                                                                                                                                                                                             |
| Title                     | 1                  | 1                                                                        |                    | Identification as an implementation study, and description of the methodology in the title and/or keywords                                                                                                                  |
| Abstract                  | 2                  | 2-3                                                                      |                    | Identification as an implementation study, including a description of the implementation strategy to be tested, the evidence-based intervention being implemented, and defining the key implementation and health outcomes. |
| <b>Introduction</b>       |                    |                                                                          |                    |                                                                                                                                                                                                                             |
| Introduction              | 3                  | 4-5                                                                      |                    | Description of the problem, challenge or deficiency in healthcare or public health that the intervention being implemented aims to address.                                                                                 |

|                             |    |       |                                                                                                                                                                                                 |       |                                                                                                                                                                            |
|-----------------------------|----|-------|-------------------------------------------------------------------------------------------------------------------------------------------------------------------------------------------------|-------|----------------------------------------------------------------------------------------------------------------------------------------------------------------------------|
| Rationale                   | 4  | 5-6   | The scientific background and rationale for the implementation strategy (including any underpinning theory/framework/model, how it is expected to achieve its effects and any pilot work).      | 5-6   | The scientific background and rationale for the intervention being implemented (including evidence about its effectiveness and how it is expected to achieve its effects). |
| Aims and objectives         | 5  | 6     | The aims of the study, differentiating between implementation objectives and any intervention objectives.                                                                                       |       |                                                                                                                                                                            |
| <b>Methods: description</b> |    |       |                                                                                                                                                                                                 |       |                                                                                                                                                                            |
| Design                      | 6  | 7     | The design and key features of the evaluation, (cross referencing to any appropriate methodology reporting standards) and any changes to study protocol, with reasons                           |       |                                                                                                                                                                            |
| Context                     | 7  | 7     | The context in which the intervention was implemented. (Consider social, economic, policy, healthcare, organisational barriers and facilitators that might influence implementation elsewhere). |       |                                                                                                                                                                            |
| Targeted 'sites'            | 8  | 7-9   | The characteristics of the targeted 'site(s)' (e.g locations/personnel/resources etc.) for implementation and any eligibility criteria.                                                         | 7-9   | The population targeted by the intervention and any eligibility criteria.                                                                                                  |
| Description                 | 9  | 11-12 | A description of the implementation strategy                                                                                                                                                    | 10-11 | A description of the intervention                                                                                                                                          |
| Sub-groups                  | 10 | n/a   | Any sub-groups recruited for additional research tasks, and/or nested studies are described                                                                                                     |       |                                                                                                                                                                            |
| <b>Methods: evaluation</b>  |    |       |                                                                                                                                                                                                 |       |                                                                                                                                                                            |
| Outcomes                    | 11 | 13-14 | Defined pre-specified primary and other outcome(s) of the implementation strategy, and how they were assessed. Document any pre-determined targets                                              | 13-14 | Defined pre-specified primary and other outcome(s) of the intervention (if assessed), and how they were assessed. Document any pre-determined targets                      |
| Process evaluation          | 12 | n/a   | Process evaluation objectives and outcomes related to the mechanism by which the strategy is expected to work                                                                                   |       |                                                                                                                                                                            |
| Economic evaluation         | 13 | 17-18 | Methods for resource use, costs, economic outcomes and analysis for the implementation strategy                                                                                                 | 17-18 | Methods for resource use, costs, economic outcomes and analysis for the intervention                                                                                       |
| Sample size                 | 14 | 17    | Rationale for sample sizes (including sample size calculations, budgetary constraints, practical considerations, data saturation, as appropriate)                                               |       |                                                                                                                                                                            |
| Analysis                    | 15 | 16-17 | Methods of analysis (with reasons for that choice)                                                                                                                                              |       |                                                                                                                                                                            |



|                       |    |                |                                                                                                                                                                                                                                           |                |                                                                                                                         |
|-----------------------|----|----------------|-------------------------------------------------------------------------------------------------------------------------------------------------------------------------------------------------------------------------------------------|----------------|-------------------------------------------------------------------------------------------------------------------------|
| Sub-group analyses    | 16 | 17             | Any a priori sub-group analyses (e.g. between different sites in a multicentre study, different clinical or demographic populations), and sub-groups recruited to specific nested research tasks                                          |                |                                                                                                                         |
| <b>Results</b>        |    |                |                                                                                                                                                                                                                                           |                |                                                                                                                         |
| Characteristics       | 17 | n/a – protocol | Proportion recruited and characteristics of the recipient population for the implementation strategy                                                                                                                                      | n/a – protocol | Proportion recruited and characteristics (if appropriate) of the recipient population for the intervention              |
| Outcomes              | 18 | n/a – protocol | Primary and other outcome(s) of the implementation strategy                                                                                                                                                                               | n/a – protocol | Primary and other outcome(s) of the Intervention (if assessed)                                                          |
| Process outcomes      | 19 | n/a – protocol | Process data related to the implementation strategy mapped to the mechanism by which the strategy is expected to work                                                                                                                     |                |                                                                                                                         |
| Economic evaluation   | 20 | n/a – protocol | Resource use, costs, economic outcomes and analysis for the implementation strategy                                                                                                                                                       | n/a – protocol | Resource use, costs, economic outcomes and analysis for the intervention                                                |
| Sub-group analyses    | 21 | n/a – protocol | Representativeness and outcomes of subgroups including those recruited to specific research tasks                                                                                                                                         |                |                                                                                                                         |
| Fidelity/adaptation   | 22 | n/a – protocol | Fidelity to implementation strategy as planned and adaptation to suit context and preferences                                                                                                                                             | n/a – protocol | Fidelity to delivering the core components of intervention (where measured)                                             |
| Contextual changes    | 23 | n/a – protocol | Contextual changes (if any) which may have affected outcomes                                                                                                                                                                              |                |                                                                                                                         |
| Harms                 | 24 | n/a – protocol | All important harms or unintended effects in each group                                                                                                                                                                                   |                |                                                                                                                         |
| <b>Discussion</b>     |    |                |                                                                                                                                                                                                                                           |                |                                                                                                                         |
| Structured discussion | 25 | N/A            | Summary of findings, strengths and limitations, comparisons with other studies, conclusions and implications                                                                                                                              |                |                                                                                                                         |
| Implications          | 26 | n/a – protocol | Discussion of policy, practice and/or research implications of the implementation strategy (specifically including scalability)                                                                                                           | n/a – protocol | Discussion of policy, practice and/or research implications of the intervention (specifically including sustainability) |
| <b>General</b>        |    |                |                                                                                                                                                                                                                                           |                |                                                                                                                         |
| Statements            | 27 | 20-21          | Include statement(s) on regulatory approvals (including, as appropriate, ethical approval, confidential use of routine data, governance approval), trial/study registration (availability of protocol), funding and conflicts of interest |                |                                                                                                                         |

1  
2  
3  
4  
5  
6  
7  
8  
9  
10  
11  
12  
13  
14  
15  
16  
17  
18  
19  
20  
21  
22  
23  
24  
25  
26  
27  
28  
29  
30  
31  
32  
33  
34  
35  
36  
37  
38  
39  
40  
41  
42  
43  
44  
45  
46

For peer review only

# BMJ Open

## Scale-up of the Australian Fans in Training (Aussie-FIT) men's health behaviour change program: Protocol for a randomised controlled hybrid effectiveness-implementation trial.

|                               |                                                                                                                                                                                                                                                                                                                                                                                                                                                                                                                                                                                                                                                                                                                                                                                                                                                                                                                                                                                                                                                                                                                                                                                                                                                                                                                                                                                                                                                                                                                                                                                                                                                                                                                                                                                                                                                                                                                                                                                                                                                                                                                                                                                                                                                                                                    |
|-------------------------------|----------------------------------------------------------------------------------------------------------------------------------------------------------------------------------------------------------------------------------------------------------------------------------------------------------------------------------------------------------------------------------------------------------------------------------------------------------------------------------------------------------------------------------------------------------------------------------------------------------------------------------------------------------------------------------------------------------------------------------------------------------------------------------------------------------------------------------------------------------------------------------------------------------------------------------------------------------------------------------------------------------------------------------------------------------------------------------------------------------------------------------------------------------------------------------------------------------------------------------------------------------------------------------------------------------------------------------------------------------------------------------------------------------------------------------------------------------------------------------------------------------------------------------------------------------------------------------------------------------------------------------------------------------------------------------------------------------------------------------------------------------------------------------------------------------------------------------------------------------------------------------------------------------------------------------------------------------------------------------------------------------------------------------------------------------------------------------------------------------------------------------------------------------------------------------------------------------------------------------------------------------------------------------------------------|
| Journal:                      | <i>BMJ Open</i>                                                                                                                                                                                                                                                                                                                                                                                                                                                                                                                                                                                                                                                                                                                                                                                                                                                                                                                                                                                                                                                                                                                                                                                                                                                                                                                                                                                                                                                                                                                                                                                                                                                                                                                                                                                                                                                                                                                                                                                                                                                                                                                                                                                                                                                                                    |
| Manuscript ID                 | bmjopen-2023-078302.R1                                                                                                                                                                                                                                                                                                                                                                                                                                                                                                                                                                                                                                                                                                                                                                                                                                                                                                                                                                                                                                                                                                                                                                                                                                                                                                                                                                                                                                                                                                                                                                                                                                                                                                                                                                                                                                                                                                                                                                                                                                                                                                                                                                                                                                                                             |
| Article Type:                 | Protocol                                                                                                                                                                                                                                                                                                                                                                                                                                                                                                                                                                                                                                                                                                                                                                                                                                                                                                                                                                                                                                                                                                                                                                                                                                                                                                                                                                                                                                                                                                                                                                                                                                                                                                                                                                                                                                                                                                                                                                                                                                                                                                                                                                                                                                                                                           |
| Date Submitted by the Author: | 21-Sep-2023                                                                                                                                                                                                                                                                                                                                                                                                                                                                                                                                                                                                                                                                                                                                                                                                                                                                                                                                                                                                                                                                                                                                                                                                                                                                                                                                                                                                                                                                                                                                                                                                                                                                                                                                                                                                                                                                                                                                                                                                                                                                                                                                                                                                                                                                                        |
| Complete List of Authors:     | <p>McDonald, Matthew; Curtin University, Physical Activity and Well-being Research Group, enAble Institute; Curtin University, Curtin School of Population Health</p> <p>Brickley, Bryce; Flinders University, College of Medicine and Public Health, Rural and Remote Health</p> <p>Pavey, Toby; Queensland University of Technology, Exercise and Nutrition Sciences</p> <p>Smith, James A ; Flinders University, College of Medicine and Public Health, Rural and Remote Health</p> <p>Maiorana, Andrew; Curtin University, School of Physiotherapy and Exercise Science; Fiona Stanley Hospital, Exercise Physiology Department</p> <p>McCaffrey, Tracy; Monash University, Nutrition, Dietetics and Food</p> <p>Hillis, Graham; Royal Perth Hospital, Department of Cardiology; The University of Western Australia, School of Medicine and Pharmacology</p> <p>Bonson, Jason; Flinders University, College of Medicine and Public Health, Rural and Remote Health</p> <p>Chih, HuiJun; Curtin University, Curtin School of Population Health</p> <p>Gupta, Himanshu; Flinders University, College of Medicine and Public Health, Rural and Remote Health</p> <p>Holmes, Scarlett; Curtin University, Physical Activity and Well-being Research Group, enAble Institute; Curtin University, Curtin School of Population Health</p> <p>Hunt, Kate; University of Stirling, Institute for Social Marketing</p> <p>Kerr, Deborah; Curtin University, Curtin School of Population Health</p> <p>Kwaśnicka, Dominika ; The University of Melbourne, NHMRC CRE in Digital Technology to Transform Chronic Disease Outcomes, Melbourne School of Population and Global Health; SWPS University of Social Sciences and Humanities, Faculty of Psychology</p> <p>Makate, Marshall; Curtin University Bentley Campus, Health Systems and Health Economics, School of Public Health</p> <p>McVeigh, Joanne; Curtin University, Physical Activity and Well-being Research Group, enAble Institute; Curtin University, Curtin School of Allied Health</p> <p>Moullin, Joanna; Curtin University, Curtin School of Population Health</p> <p>Smith, Brendan; Curtin University, Physical Activity and Well-being Research Group, enAble Institute; Curtin University, Curtin School of Population Health</p> |

1  
2  
3  
4  
5  
6  
7  
8  
9  
10  
11  
12  
13  
14  
15  
16  
17  
18  
19  
20  
21  
22  
23  
24  
25  
26  
27  
28  
29  
30  
31  
32  
33  
34  
35  
36  
37  
38  
39  
40  
41  
42  
43  
44  
45  
46  
47  
48  
49  
50  
51  
52  
53  
54  
55  
56  
57  
58  
59  
60

|                                                        |                                                                                                                                                                                                                                                                                |
|--------------------------------------------------------|--------------------------------------------------------------------------------------------------------------------------------------------------------------------------------------------------------------------------------------------------------------------------------|
|                                                        | Wharton, Lee; Queensland University of Technology<br>Wharton, Neil; Queensland University of Technology<br>Quested, Eleanor; Curtin University, Physical Activity and Well-being<br>Research Group, enAble Institute; Curtin University, Curtin School of<br>Population Health |
| <b>&lt;b&gt;Primary Subject<br/>Heading&lt;/b&gt;:</b> | Public health                                                                                                                                                                                                                                                                  |
| <b>Secondary Subject Heading:</b>                      | Cardiovascular medicine, Public health, Sports and exercise medicine                                                                                                                                                                                                           |
| <b>Keywords:</b>                                       | Obesity, Primary Prevention, PUBLIC HEALTH, Randomized Controlled<br>Trial, CARDIOLOGY                                                                                                                                                                                         |
|                                                        |                                                                                                                                                                                                                                                                                |

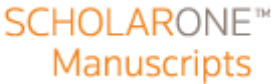

1  
2  
3 **1 Scale-up of the Australian Fans in Training (Aussie-FIT) men's health behaviour**  
4  
5 **2 change program: Protocol for a randomised controlled hybrid effectiveness-**  
6  
7 **3 implementation trial.**  
8  
9

10 <sup>a,b</sup>McDonald, M.D., <sup>c</sup>Brickley, B., <sup>d</sup>Pavey, T., <sup>c</sup>Smith, J.A., <sup>a,e,f</sup>Maiorana, A., <sup>g</sup>McCaffrey, T.,  
11  
12 <sup>h,i</sup>Hillis, G., <sup>c</sup>Bonson, J., <sup>b</sup>Chih, H.J., <sup>c</sup>Gupta, H., <sup>b</sup>Holmes, S., <sup>j</sup>Hunt, K., <sup>a,b</sup>Kerr, D.,  
13  
14 <sup>k,l</sup>Kwasnicka, D., <sup>b</sup>Makate, M., <sup>a,e</sup>McVeigh, J., <sup>a,b</sup>Moullin, J.C., <sup>a,b</sup>Smith, B., <sup>d</sup>Wharton, L.,  
15  
16 <sup>d</sup>Wharton, N., & <sup>a,b</sup>Quested, E.  
17  
18

19 <sup>a</sup>*Physical Activity and Well-being Research Group, enAble Institute, Curtin University, Perth,*  
20  
21 *Western Australia;*  
22  
23

24 <sup>b</sup>*Curtin School of Population Health, Curtin University, Perth, Western Australia;*  
25

26 <sup>c</sup>*Flinders University, College of Medicine and Public Health, Rural and Remote Health,*  
27  
28 *Darwin, Northern Territory, Australia*  
29

30 <sup>d</sup>*Queensland University of Technology, Queensland*  
31

32 <sup>e</sup>*Curtin School of Allied Health, Curtin University, Perth, Western Australia;*  
33  
34

35 <sup>f</sup>*Exercise Physiology Department, Fiona Stanley Hospital, Perth, Western Australia;*  
36

37 <sup>g</sup>*Department of Nutrition, Dietetics and Food, Monash University, Notting Hill, Victoria;*  
38

39 <sup>h</sup>*Department of Cardiology, Royal Perth Hospital, Perth, Western Australia, Australia*  
40

41 <sup>i</sup>*Medical School, The University of Western Australia, Perth, Western Australia, Australia*  
42  
43

44 <sup>j</sup>*Institute for Social Marketing and Health, University of Stirling, Stirling, UK*  
45

46 <sup>k</sup>*Faculty of Psychology, SWPS University of Social Sciences and Humanities, Poland*  
47  
48

49 <sup>l</sup>*School of Population and Global Health, University of Melbourne, Melbourne, Australia*  
50  
51

52  
53  
54 \*Corresponding author: Eleanor Quested, Curtin School of Population Health, Curtin  
55  
56 University, Perth, Australia. eleanor.quested@curtin.edu.au  
57

58 **Version number and date:** Protocol version 1, date: 28 July 2023  
59  
60

1  
2  
3 **26 Abstract**  
4

5 **27 Introduction**  
6

7  
8 28 Improving physical activity and healthy eating is critical for primary and secondary  
9  
10 29 prevention of cardiovascular disease (CVD). Behaviour change programs delivered in  
11  
12 30 sporting clubs can engage men in health behaviour change but are rarely sustained or scaled-  
13  
14 31 up post-trial. Following the success of pilot studies of the Australian Fans in Training  
15  
16 32 (Aussie-FIT) program, a hybrid effectiveness-implementation trial protocol was developed.  
17  
18 33 This protocol outlines methods to: i) establish if Aussie-FIT is effective at supporting men  
19  
20 34 with or at risk of CVD to sustain improvements in moderate-to-vigorous physical activity  
21  
22 35 (primary outcome), diet, and physical and psychological health, and ii) examine the  
23  
24 36 feasibility and utility of implementation strategies to support program adoption,  
25  
26 37 implementation and sustainment.  
27  
28  
29

30 **38 Methods and Analysis**  
31

32  
33 39 A pragmatic multi-State/Territory hybrid type 2 effectiveness-implementation parallel group  
34  
35 40 randomised controlled trial with a 6 month wait-list control arm in Australia. 320 men aged  
36  
37 41 35-75 years with or at-risk of CVD will be recruited. Aussie-FIT involves 12 weekly face-to-  
38  
39 42 face sessions including coach-led interactive education workshops and physical activity  
40  
41 43 delivered in Australian Football League (Western Australia, Northern Territory) and rugby  
42  
43 44 (Queensland) sports club settings. Follow-up measures will be at 3- and 6-months (both  
44  
45 45 groups), and at 12 months to assess maintenance (intervention group only). Implementation  
46  
47 46 outcomes will be reported using the RE-AIM (Reach, Effectiveness, Adoption,  
48  
49 47 Implementation, Maintenance) framework.  
50  
51

52 **48 Ethics and Dissemination**  
53

54  
55 49 This multi-site study has been approved by the lead ethics committees in the lead site's  
56  
57 50 jurisdiction, the South Metropolitan Health Service Human Research Ethics Committee  
58  
59  
60

1  
2  
3 51 (Reference RGS4254) and the West Australian Aboriginal Health Ethics Committee  
4  
5 52 (HREC1221). Findings will be disseminated at academic conferences, peer-reviewed journals  
6  
7  
8 53 and via presentations and reports to stakeholders, including consumers. Findings will inform  
9  
10 54 a blueprint to support the sustainment and scale-up of Aussie-FIT across diverse Australian  
11  
12 55 settings and populations to benefit men's health.  
13  
14  
15 56

### 17 57 **Strengths and Limitations**

- 19 58 • This is the first multi-State/Territory trial of a 'fans in training' style intervention.
- 21  
22 59 • Consumers and other stakeholders contributed to the development of the protocol, in  
23  
24 60 particular recruitment and data collection methods.
- 25  
26 61 • Using a hybrid design will facilitate the concurrent assessment of intervention  
27  
28 62 effectiveness and implementation outcomes, promoting efficient implementation and  
29  
30 63 long-term impact of this evidence-based program.
- 31  
32  
33 64 • Due to the nature of the intervention, participants will not be blinded to treatment  
34  
35 65 allocation.  
36  
37  
38 66

39  
40 67 **Word count:** 4550  
41  
42  
43  
44  
45  
46  
47  
48  
49  
50  
51  
52  
53  
54  
55  
56  
57  
58  
59  
60

## 68 Introduction

69 The cardiovascular benefits of physical activity (PA) and eating a healthy diet are well  
70 established, however, 55% of people who live in Australia do not meet PA guidelines, most  
71 eat an unhealthy diet and 67% are living with overweight or obesity (1). Among those with a  
72 cardiovascular disease (CVD) diagnosis, exercise adherence remains low. Most men with  
73 CVD fail to initiate or sustain health behaviour changes, decreasing quality of life and  
74 increasing risk of future CVD and premature death (2). For instance, only 30% of patients  
75 complete outpatient cardiac rehabilitation, and of those, less than 50% are sufficiently active  
76 12 months after their cardiac event (2).

77 A patient survey showed many patients lack self-management skills and are too dependent on  
78 exercise rehabilitation staff to sustain behaviour changes upon completion of hospital-based  
79 exercise programs (3). Recent estimates suggest that increasing participation in cardiac  
80 rehabilitation in Australia from 30% to 65% would result in \$36 million in healthcare savings,  
81 \$58 million in social and economic benefits, and significantly reduce annual heart attack  
82 admissions (4). To reap these health and economic benefits, new strategies are required to  
83 increase PA adherence and healthy eating in people with or at-risk of CVD. Gender tailored  
84 programs are important, because men and women experience differences in CVDs risks and  
85 occurrences (5). Gender-tailored health behaviour change programs for men have been shown  
86 to be appealing and effective (6).

87 The internationally recognised 'Football Fans in Training' (FFIT) program, and our  
88 Australian adaptation (Aussie-FIT), are effective in engaging men to improve their health  
89 behaviours. FFIT (7) and Aussie-FIT (8) capitalise on men's interest in sport to promote weight  
90 loss via sustained improvements in diet and PA. These structured 12-week programs include  
91 90 minutes of interactive education and group-based PA that aims to develop the skills and



1  
2  
3 92 confidence of participants to self-regulate and maintain behaviour change long-term. Programs  
4  
5 93 are delivered to groups of men by trained coaches in professional sport facilities. The  
6  
7 94 effectiveness and cost-effectiveness of FFIT was established in a Randomised Control Trial  
8  
9 95 (RCT) (7). Mean between group weight lost at 12 months was 5kg, and average weight loss  
10  
11 96 maintenance of 2.9kg was observed in the intervention group 3.5 years post-baseline (9) . FFIT  
12  
13 97 was adapted for the European Fans in Training (EuroFIT) RCT in 5 European countries, where  
14  
15 98 similar findings were revealed (10).

19  
20 99 Kwasnicka et al (2020) demonstrated feasibility of recruitment, engagement, and  
21  
22 100 retention of men living with overweight and obesity, as well as acceptability of the Aussie-FIT  
23  
24 101 intervention and research procedures when delivered at top-tier Australian Football League  
25  
26 102 (AFL) clubs in Western Australia (WA). Promising physical and mental health outcomes were  
27  
28 103 observed (11). In a single-arm feasibility trial in Queensland (QLD), a version of Aussie-FIT  
29  
30 104 adapted for rugby league (League-FIT) has engaged men living with overweight and obesity,  
31  
32 105 and demonstrated promise in supporting positive physical and mental health outcomes (12). In  
33  
34 106 a feasibility study of the Aussie-FIT program undertaken at second-tier AFL clubs for men  
35  
36 107 with CVD, Smith et al (manuscript in preparation) demonstrated feasibility of participant  
37  
38 108 engagement and retention, and acceptability of the intervention and research procedures.  
39  
40 109 However, recruiting men with CVD was challenging (Smith et al., manuscript in progress).  
41  
42 110 Recruitment challenges were likely due to the smaller population of men with CVD (6.5% of  
43  
44 111 men in Australia) (13) compared with 75% of men with overweight and obesity in Australia  
45  
46 112 (14), and the smaller fanbases of second-tier AFL clubs compared to top-tier clubs. The  
47  
48 113 effectiveness of Aussie-FIT remains to be tested, as do implementation strategies designed to  
49  
50 114 improve the adoption, implementation, sustainment and scale-up of the program to reach  
51  
52 115 diverse populations of at-risk men. This multi-State/Territory trial aims to establish the  
53  
54  
55  
56  
57  
58  
59  
60

1  
2  
3 116 effectiveness of the Aussie-FIT intervention for men with or at-risk of CVD, whilst allowing  
4  
5 117 for flexibility with club-size (e.g., top-tier or second-tier) across diverse Australian contexts.  
6  
7

8 118 A recent systematic review of five unique interventions concluded that, whilst FFIT  
9  
10 119 has been successfully scaled up, not all health promotion interventions delivered through  
11  
12 120 professional sport have been successfully scaled up, and thus a greater focus on the potential  
13  
14 121 for scalability of these interventions is required (15). Scalability is the process of increasing  
15  
16 122 the number of implementers (e.g., sports clubs) that are willing to initiate delivery of  
17  
18 123 effective interventions to reach a greater proportion of the target population (16). The  
19  
20 124 potential for intervention scalability is increasingly considered across the research spectrum,  
21  
22 125 rather than solely positioned at the end of a linear research pipeline after effectiveness testing  
23  
24 126 (17). One increasingly common approach to considering implementation and scalability  
25  
26 127 earlier in the research process is the use of hybrid effectiveness-implementation study  
27  
28 128 designs, which allow for the assessment of intervention effectiveness alongside  
29  
30 129 implementation outcomes (18). Implementation outcomes that are important for scalability  
31  
32 130 include program costs, fidelity, adaptability, delivery settings, infrastructure, workforce,  
33  
34 131 reach and acceptability in diverse populations (Milat et al., 2020).  
35  
36  
37  
38  
39  
40

41 132 This trial adopts a hybrid effectiveness-implementation design (19) to examine the  
42  
43 133 effectiveness of Aussie-FIT, and in parallel assess the feasibility and utility of  
44  
45 134 implementation strategies to support program adoption, implementation, sustainment and  
46  
47 135 scalability, using the RE-AIM framework. We pose two research questions to simultaneously  
48  
49 136 address both the intervention and the implementation process aims (20): 1) is the Aussie-FIT  
50  
51 137 program effective in increasing time spent in moderate-to-vigorous physical activity (MVPA);  
52  
53 138 and improving other secondary outcomes among men with or at-risk of CVD at 6 month  
54  
55 139 follow up; and 2) what are the facilitators and barriers to implementation, sustainment and  
56  
57 140 scalability of the Aussie-FIT program?  
58  
59  
60

## 141 **Method**

142 This protocol follows the SPIRIT approved reporting standards for standard protocol items  
143 (Supplementary File 1) and meets the requirements of the Standards for Reporting  
144 Implementation Studies (StaRI) (20) (Supplementary File 2).

## 145 **Study design**

146 This study is a pragmatic multi-State/Territory Hybrid Type 2 Effectiveness-Implementation  
147 parallel group RCT with a 6 months wait-list control. Follow-up measures are at 3 and 6 months  
148 (primary outcome) post-baseline for both the intervention and control groups; and at 12 months  
149 for the intervention group to assess maintenance (see Figure 1, CONSORT diagram).  
150 Observational implementation outcomes will be reported using the RE-AIM framework (21).  
151 This trial is registered with the Australian New Zealand Clinical Trials Registry  
152 (ACTRN12623000437662).

## 153 **Context**

154 The study is set in and around the capital cities of Darwin (Northern Territory), Perth  
155 (WA), and Brisbane (QLD). These urban centres have distinct contextual characteristics. QLD  
156 and WA make up 20% and 10% of the national population respectively and are far more  
157 populated than the Northern Territory (NT) which makes up less than 1% of the national  
158 population (22). There is significant cultural diversity across each State/Territory; for example,  
159 the proportion of males that identify as Aboriginal and/or Torres Strait Islander in the NT  
160 (26.3%) is considerably higher than in QLD (4.6%) and WA (3.3%) (23). Australian Football  
161 is the most popular sport in WA and the NT, whereas in QLD, Rugby League is most popular  
162 (24).

## 163 **Patient and Public Involvement**

1  
2  
3 164 Patient and public engagement has been central to the development of the Aussie-FIT  
4  
5 165 program since its ' inception and in previous pilot studies in which the intervention was  
6  
7 166 developed based on patient priorities. In preparation for and in the design of this trial,  
8  
9  
10 167 community advisory groups consisting of consumers (i.e., men with or at-risk of CVD, and  
11  
12 168 former Aussie-FIT participants) and stakeholders (e.g., Aussie-FIT coaches, sporting club or  
13  
14 169 community representatives) have been formed in each State/Territory. These groups include  
15  
16  
17 170 representation of Aboriginal and/or Torres Strait Islander men. The first of these groups met in  
18  
19 171 December 2022. Community advisory groups have helped identify potential barriers and  
20  
21 172 enablers of project success and have co-designed responsive implementation strategies. These  
22  
23 173 groups will continue to work in partnership with the research team throughout the lifespan of  
24  
25 174 this project. This will include providing input on culturally appropriate recruitment strategies,  
26  
27 175 retention strategies, involvement in dissemination planning, and if the effectiveness of the  
28  
29 176 intervention is established, providing advice on the sustainment and scalability of Aussie-FIT.  
30  
31  
32 177 The outcomes of our cross-site consumer and stakeholder involvement activities during the  
33  
34 178 trial set-up period, and at later stages in the trial, will be reported in future publications.  
35  
36 179 Presentations and reports for consumers and stakeholders will be co-designed with consumers  
37  
38 180 and stakeholders and disseminated to participants and other consumer and community  
39  
40 181 audiences.

## 41 42 43 44 45 182 **Participants**

### 46 47 48 183 Inclusion criteria

49  
50  
51  
52 184 Men aged 35-75 in WA (n=128), NT (n=96) and QLD (n=96) that self-report meeting  
53  
54 185 one or more of the following criteria will be recruited:

55  
56  
57 186 a) CVD diagnosis more than 3 months prior to commencing the study, with no upper  
58  
59 187 limit on length of time since diagnosis; OR

1  
2  
3 188 b)  $\geq 10\%$  risk of CVD, according to the online calculator created by the Australian  
4  
5 189 Chronic Disease Prevention Alliance, that assesses CVD 5-year risk  
6  
7  
8 190 ([www.cvdcheck.org.au/calculator](http://www.cvdcheck.org.au/calculator)); OR  
9

10  
11 191 c) Body mass index  $\geq 28\text{kg/m}^2$ .

12  
13  
14 192 To determine whether they are eligible, potential participants will complete an online  
15  
16 193 form, co-designed with consumers to ensure accessibility for men.

17  
18  
19 194 Participants from non-English speaking backgrounds will be offered interpreters if  
20  
21 195 they wish to participate in the study. Men at risk of harm from PA will be excluded from  
22  
23 196 vigorous PA and will instead undertake light or moderate PA as tolerated (if appropriate  
24  
25 197 based on GP/cardiologist's advice). Where possible men who have not participated in  
26  
27 198 previous Aussie-FIT or League-FIT programs will be prioritised.

### 30 199 ***Exclusion criteria***

31  
32  
33  
34 200 Exclusion criteria are: unable to comprehend information or consent documentation;  
35  
36 201 unable to attend most of the weekly sessions, diagnosed with CVD less than 3 months prior to  
37  
38 202 the baseline assessments date; experienced a cardiac event less than 3 months prior to the  
39  
40 203 baseline assessments date; or a medical professional advises against participation (e.g., due to  
41  
42 204 having a cardiac condition not suitable for an exercise trial in the community such as severe  
43  
44 205 aortic stenosis or on-going angina).

### 47 206 **Recruitment**

48  
49  
50  
51 207 Participants will be selected on a 'first come, first served' basis. Men with CVD will be  
52  
53 208 identified from medical records at hospitals (WA only), cardiac rehabilitation programs  
54  
55 209 delivered in hospitals, or in the community, and GP or other primary health care services. Men  
56  
57 210 with or at-risk of CVD will be recruited from community sources including club members'  
58  
59  
60

1  
2  
3 211 newsletters, traditional/social media, match-day publicity (e.g., announcements, face-to-face  
4  
5 212 recruitment), snowball sampling (25), sport publications, and local health councils. Interested  
6  
7  
8 213 individuals who see the program advertised will be directed to complete a web-based  
9  
10 214 expression of interest (EOI) form. Men who prefer not to use the online EOI form will have  
11  
12 215 the opportunity to express their interest, ask questions, check their eligibility, and enrol (if  
13  
14 216 eligible) by contacting the research team directly via phone or email. The online EOI form  
15  
16  
17 217 includes a series of questions to confirm eligibility.

18  
19  
20 218 This trial will host a nested ‘study within a trial’ (SWAT) (26) to examine the utility of  
21  
22 219 a self-directed online enrolment in comparison to a phone call enrolment process (27). Eligible  
23  
24 220 men that complete the online EOI will be randomised via the online form to either immediately  
25  
26 221 book their enrolment appointment online or to receive a call from a researcher to progress their  
27  
28 222 enrolment. The SWAT will evaluate the effectiveness (including cost-effectiveness) of the  
29  
30 223 online approach compared to the standard phone call on enrolment rates (27).  
31  
32  
33

#### 34 35 224 **Intervention (Aussie-FIT Program)**

36  
37  
38 225 The intervention is described following the Template for Intervention Description and  
39  
40 226 Replication (TIDieR) guidance (28), see Table 1. In brief, the 12, weekly, 90-minute sessions  
41  
42 227 will be delivered to groups of 16 men. One coach and one Accredited Exercise Physiologist  
43  
44 228 (AEP) or equivalent suitable health professional facilitate each group. Coaches and AEPs will  
45  
46 229 be trained by the research team in the core content (PA and diet education), safe exercise for  
47  
48 230 men with or at-risk of CVD, and in the use of principles of motivation and behaviour change.  
49  
50 231 Coaches will lead on the program content delivery and AEPs will be primarily responsible for  
51  
52 232 exercise safety. Practical activities and discussions are designed to help men understand why  
53  
54 233 and how to improve PA (e.g., understanding exercise intensities, safe strength training,  
55  
56 234 decreasing sedentary time) and dietary behaviours (e.g., interpreting food labels, portion sizes,  
57  
58  
59  
60

1  
2  
3 235 meal planning, eating out), and incorporate behaviour change techniques to support participants  
4  
5 236 to adopt positive health behaviours in their daily lives. A range of PA intensities are promoted,  
6  
7 237 and ball skills and circuit training like those undertaken by professional players but modified  
8  
9 238 to be safe for each man's limitations (e.g., ball skill drills restricted to walking) undertaken.  
10  
11  
12 239 Men are encouraged to self-monitor walking, gradually increasing steps/day throughout the 12-  
13  
14 240 weeks. The AEP will co-deliver the sessions and support the coach by monitoring participants  
15  
16 241 (e.g., blood pressure checks), providing advice on safe exercise and providing first aid, if  
17  
18 242 required. The waitlist control group (another 16 men from each club) will receive the program  
19  
20 243 6 months later.  
21  
22  
23  
24

#### 25 244 **Description of the implementation strategy**

26  
27  
28 245 Our consumer advisory groups have supported the development of our implementation  
29  
30 246 strategies in the study set-up phase of this project, full details of which will be reported  
31  
32 247 elsewhere. The implementation study is structured by the RE-AIM framework (Reach,  
33  
34 248 Effectiveness, Adoption, Implementation, and Maintenance) (12).  
35  
36  
37

38 249 Reach: Program recruitment strategies have been co-designed with men with or at risk of  
39  
40 250 cardiovascular disease (CVD). These strategies will be tailored for each State/Territory in  
41  
42 251 consultation with community advisory groups.  
43  
44  
45

46 252 Effectiveness: Individual effectiveness outcomes will be tested via the RCT. Negative or  
47  
48 253 unintended consequences will also be documented.  
49  
50

51  
52 254 Adoption: Clubs will be invited to offer formal commitments to continue deliveries pending  
53  
54 255 further funding opportunities in each State/Territory. An infrastructure and costing model will  
55  
56 256 be developed to support clubs in sustaining the program, and preferences for models of  
57  
58 257 sustained program deliveries will be co-designed with stakeholders.  
59  
60

1  
2  
3 258 Implementation: A comprehensive coach delivery package will support fidelity of program  
4  
5 259 delivery. This package includes 15 hours of training for the coaches, detailed program delivery  
6  
7  
8 260 speaking notes, a timing guide, and rationales. Reusable teaching resources will also be  
9  
10 261 provided to support high-quality delivery. Implementation costs, such as coaches' time for  
11  
12 262 delivering and preparing for sessions, have been included in the program costing model.

13  
14  
15 263 Maintenance: Our nested SWAT will evaluate an automated enrolment strategy, designed to  
16  
17 264 improve program sustainability when fewer resources are available compared to the trial phase.  
18  
19 265 Resource sharing agreements will be developed, if required, to ensure the intervention  
20  
21 266 materials can continue to be used post-trial. Sustainability action plans will be developed with  
22  
23 267 stakeholders, including identifying suitable charities as delivery partners for ongoing program  
24  
25 268 deliveries. Indications of individual participant-level behaviour change maintenance will be  
26  
27 269 assessed at 12-months follow-up in the intervention group.

28  
29  
30 270 Throughout the implementation process, barriers and facilitators to implementation will be  
31  
32 271 identified (by stakeholders, including consumers and researchers) and targeted in future  
33  
34 272 modifications to the program. Interviews with stakeholders will be conducted to identify these  
35  
36 273 barriers and facilitators. Contextual adaptations required for the different States and Territories  
37  
38 274 will be documented and evaluated. These adaptations will be co-designed with our consumer  
39  
40 275 advisory groups to ensure contextual fit while preserving fidelity.

#### 41 42 43 44 45 46 47 276 **Blinding and Randomisation**

48  
49  
50 277 It is not possible to blind participants to condition due to the nature of the intervention.  
51  
52 278 Data collectors will be blinded as far as possible. Questionnaire data will be completed online,  
53  
54 279 PA data will be device measured, and participants will be asked not to reveal whether they are  
55  
56 280 in the intervention or waitlist control arm, when objective measures of weight and blood  
57  
58 281 pressure are taken.



1  
2  
3 282 Aligned with the EuroFIT trial, we propose an individual randomisation for each club,  
4  
5 283 given the FFIT study confirmed that the minimal between-group contamination effects did not  
6  
7 284 warrant higher sample size and costs of a cluster trial. (10) Participants from each club (10  
8  
9 285 clubs, 32 participants per club) will be individually randomised (1:1 randomisation, in blocks  
10  
11 286 of 8 to reduce prediction of group allocation). A statistician generated the randomisation list  
12  
13 287 using the RANDBETWEEN (1,2) function using Excel. The statistician, who is not  
14  
15 288 involved in data collection, will not be told if group 1 or group 2 is the intervention arm to  
16  
17 289 assure blindness during the analyses. Following completion of baseline measures, trained  
18  
19 290 research assistants will use opaque, sealed envelopes to assign participants to intervention or  
20  
21 291 control arms.  
22  
23  
24  
25

### 26 292 **Primary outcome: Physical Activity**

27  
28  
29 293 Participants will also be asked to wear an Actigraph GTX9 (ActiGraph LLC, Pensacola,  
30  
31 294 FL) monitor continuously for 7-days on their non-dominant wrist at each data collection time-  
32  
33 295 point to provide a valid and reliable assessment of MVPA (29). The GT9X is a small  
34  
35 296 (3.5 × 3.5 × 1 cm), lightweight (14 g), and waterproof tri-axial accelerometer. The monitors  
36  
37 297 will be initialised to collect data at a 30hz sampling rate. Men will be provided with written  
38  
39 298 instructions for wearing the Actigraph.  
40  
41  
42  
43

### 44 299 **Secondary Outcomes**

45  
46  
47 300 Secondary outcomes include dietary intake, weight, blood pressure, cholesterol, self-  
48  
49 301 esteem, affective states, quality of life, motivation for physical activity, and use of behaviour  
50  
51 302 change strategies targeted in the program. A full list of variables assessed and measurement  
52  
53 303 tools is included in Table 2.  
54  
55  
56

### 57 304 **Implementation Outcomes**

1  
2  
3 305 Implementation outcomes will be reported using the RE-AIM (Reach, Effectiveness,  
4  
5 306 Adoption, Implementation, Maintenance) framework (21). Reach: we will report on the  
6  
7 307 number of participants interested and recruited; descriptive statistics of their  
8  
9 308 representativeness, using demographics (e.g., comorbidities, weight, socioeconomic status,  
10  
11 309 ethnicity) of those recruited in each locality; Effectiveness: as per description of intervention  
12  
13 310 outcomes and for effectiveness of implementation outcomes, with qualitative interview  
14  
15 311 findings; Adoption: records of adaptation to the intervention and implementation strategies  
16  
17 312 (between clubs, locations etc); Implementation: fidelity to key content (e.g., educational  
18  
19 313 messages) and functions (e.g., appropriate use of behaviour change techniques) via coding of  
20  
21 314 a subsample of deliveries; adaptations to delivery in each location, ascertained from  
22  
23 315 coach/participant interviews; barriers and facilitators to program implementation from  
24  
25 316 perspectives of coaches, administrators, and participants via interviews; Maintenance:  
26  
27 317 intentions to continue delivering the program (for clubs in this trial) and intentions to initiate  
28  
29 318 program delivery when further funding secured (new clubs),  
30  
31  
32  
33  
34  
35

### 36 **Procedure**

37  
38  
39 320 Participants will book an appointment to attend baseline measures (detailed in Table 2)  
40  
41 321 at the football or rugby club. Measurement sessions will be led by a team of trained research  
42  
43 322 assistants. Participants will be asked to complete a survey, which will be presented to them on  
44  
45 323 an iPad using Qualtrics software. The self-administered survey will ask men demographic  
46  
47 324 questions including their age, ethnicity, education, marital status, current employment status,  
48  
49 325 income, and housing status. Weight, height and waist measurements will be taken by a trained  
50  
51 326 researcher. Cholesterol will be checked using a finger-prick test that measures non-fasting  
52  
53 327 cholesterol immediately. Participants will undertake a 24-hour dietary recall using the  
54  
55 328 Intake24, an open-source self-completed computerised dietary recall system based on multiple-  
56  
57 329 pass 24-hour recall. A trained interviewer will assist participants to complete the recall. The  
58  
59  
60

1  
2  
3 330 self-administered survey will also include items assessing alcohol content, and participants will  
4  
5 331 also be asked to respond to questions assessing their emotions (i.e., positive and negative  
6  
7  
8 332 affect), quality of life, self-esteem, motivation to for PA and use of behaviour change strategies  
9  
10 333 taught in Aussie-FIT (automaticity, goal conflict, goal facilitation, coping planning, action  
11  
12 334 planning). Participants are asked to respond on Likert scales of 1-5 or 1-7. Participants can skip  
13  
14 335 questions if they prefer not to answer them. All questions have established psychometric  
15  
16 336 properties and have been used by the research team in studies with similar populations. The  
17  
18 337 questionnaire pack should take less than 30 minutes to complete. A trained research assistant  
19  
20 338 will be available to explain to participants how to complete the survey and to answer any  
21  
22 339 questions they may have during completion of the questionnaire. All participants will be  
23  
24 340 required to complete the Exercise and Sport Science Australia (ESSA): Adult Pre-Exercise  
25  
26 341 Screening System (APSS) (30) at the baseline measures session. ESSA stipulates that all  
27  
28 342 participants who answer 'yes' to a screening question should see an Allied Health Professional  
29  
30 343 or their general practitioner (GP). To reduce burden on participants of the need to attend a GP  
31  
32 344 appointment, an Accredited Exercise Physiologist (AEP) (or other equivalent allied health  
33  
34 345 professional) will review every participant's APSS form and discuss medical history with every  
35  
36 346 participant, to determine whether they are at risk from physical activity. Waitlist control group  
37  
38 347 participants will be re-screened at the assessment they attend prior to starting the program in  
39  
40 348 case of any change in health status from baseline.

41  
42  
43  
44  
45  
46  
47  
48 349 The full assessment process will usually take about 90 minutes. Following  
49  
50 350 randomisation, participants will be informed as to whether they will receive the 12-week  
51  
52 351 intervention immediately (i.e., the intervention arm) or ~6 months later (i.e., the waitlist control  
53  
54 352 group). Once the intervention arm participants have completed the program, the assessment  
55  
56 353 package will be repeated for both the control and intervention groups (3 months post baseline)  
57  
58 354 and then at 6 months post baseline. After the 6 months measures, the waitlist control arm will  
59  
60

1  
2  
3 355 complete the 12-week program. Finally, the intervention arm will be asked to attend one final  
4  
5 356 assessment, 12 months post baseline.  
6  
7  
8

9 357 Where applicable, information regarding the participants' CVD diagnosis will be self-  
10  
11 358 reported or obtained from medical records. Participant attendance at the program will also be  
12  
13 359 recorded. At baseline, participants will be asked to tick yes or no to the question "in the future  
14  
15 360 we may wish to contact you to join a group or individual interview to talk about your  
16  
17 361 experiences in the program. Do you consent for us to contact you? Yes/No". Approximately  
18  
19 362 20 of those who tick 'yes', will be contacted by telephone or email at 6 months and/or 12  
20  
21 363 months, and invited to take part in an interview, which will be conducted on Microsoft Teams  
22  
23 364 videoconference or in person at the football/rugby club (depending on the person's preference).  
24  
25 365 Interview questions will be developed in collaboration with PhD candidates and an ethics  
26  
27 366 amendment will be submitted for approval prior to undertaking any interviews. Any changes  
28  
29 367 to protocol will be reported on the study Open Science Framework page (<https://osf.io/ev8px/>).  
30  
31  
32  
33  
34

### 35 368 **Treatment of Waitlist Control Arm**

36  
37  
38 369 All men will be directed to review evidence-based resources (i.e., Heart Foundation  
39  
40 370 online material) regarding PA and healthy eating after completion of the baseline assessments  
41  
42 371 and men in the waitlist control arm will be invited to participate in Aussie-FIT after the 6-  
43  
44 372 month post baseline assessment.  
45  
46  
47

### 48 373 **Data Analyses**

49  
50  
51 374 Physical activity data will be downloaded via the ActiLife software (version 6.13.4),  
52  
53 375 where the raw accelerometer data will be processed in R using the GGIR V1.5-21 package  
54  
55 376 ([cran.r-project.org/web/packages/GGIR/index.html](http://cran.r-project.org/web/packages/GGIR/index.html)) (31,32). Physical activity will be  
56  
57 377 estimated from 5-second epochs, with the average daily activity calculated. To be classified as  
58  
59  
60

1  
2  
3 378 moderate to vigorous physical activity (MVPA) mean acceleration needs to be  $\geq 100$  milli-g  
4  
5 379 (mg) (33). Time in activities lasting at least 1 minute, for which 80% of the activity satisfied  
6  
7 380 the 100 mg threshold criteria, will be calculated. Average acceleration (calculated as the mean  
8  
9 381 acceleration across the 24-hour day as a proxy for the daily volume of PA) and intensity-  
10  
11 382 gradient (as a reflection of the distribution of intensity across the 24-hour day) will be  
12  
13 383 calculated (34,35). We will only include in the analysis those participants with four or more  
14  
15 384 valid days of accelerometry data, and at least 10 hours of wear time each day.

16  
17  
18  
19  
20 385 De-identified objective measurements, questionnaire data and calculated PA data will  
21  
22 386 be exported to Stata software for analyses by an independent biostatistician blinded to the group  
23  
24 387 allocation. Characteristics of the participants will be summarised in mean (and standard  
25  
26 388 deviation) or median (and interquartile range) or frequency (and percentage), by treatment  
27  
28 389 groups. Program efficacy will be analysed following the intention-to-treat principle and per-  
29  
30 390 protocol approaches outlined below. Changes in the post-intervention outcomes will be  
31  
32 391 analysed using linear mixed effect regression models whilst controlling for the baseline  
33  
34 392 measures. Sensitivity analyses will also be performed to include covariates such as age, BMI,  
35  
36 393 types of comorbidities in the model to compare the beta coefficient of the models with and  
37  
38 394 without the covariates. If group sizes permit, sub-group analyses will be performed to examine  
39  
40 395 differences in intervention effects on primary and secondary outcomes between i)  
41  
42 396 States/Territories; ii) men diagnosed with and without a CVD diagnosis, iii) men with BMI  
43  
44 397  $\geq 25$  and men with BMI  $< 25$ ; and iii) men who identify as Aboriginal and Torres Strait Islander  
45  
46 398 and men who do not. Further details are available regarding data management and statistical  
47  
48 399 analysis plans on the project page of the Open Science Framework (<https://osf.io/ev8px/>).

#### 400 **Sample Size Calculations**

1  
2  
3 401 320 men will be recruited: in WA (n=128), NT (n=96) and QLD (n=96), 160 per arm. This  
4  
5 402 estimate is based on observed changes in moderate-to-vigorous PA (MVPA) in the Aussie-FIT  
6  
7 403 pilot (11) and provides 90% power to detect a mean difference of 11-minutes/day (standard  
8  
9 404 deviation:27-minutes/day) of MVPA at 6-months (primary endpoint). The sample size  
10  
11 405 powered on MVPA because PA reduces CVD risk independently, and mitigates other risk  
12  
13 406 factors, such as high blood pressure (36). Change in MVPA of 5 minutes per day is considered  
14  
15 407 the minimum clinically important difference.(37) We allow for a trial attrition rate of 20%.

## 20 408 **Economic Evaluation**

23 409 We will use an economic model of the type developed in the Aussie-FIT pilot (11). The cost-  
24  
25 410 effectiveness analysis will be performed from a health system perspective. Costs will include  
26  
27 411 direct costs associated with the programme (including setting up and promotion) as well as  
28  
29 412 self-reported healthcare resource use. In terms of outcome measurement, we will include  
30  
31 413 short-term outcomes that will allow us to look at the cost per clinically relevant change in  
32  
33 414 MVPA (5 minutes per day, (37)) and cost per quality-adjusted life years (QALYs). The  
34  
35 415 QALY is the most widely used approach in economic evaluations for quantifying quality of  
36  
37 416 life gains (38). The EQ-5D-5L questionnaire will be used to assess quality of life (39), which  
38  
39 417 is a standardized measure of health status widely adopted in economic evaluations (40). The  
40  
41 418 EQ-5D-5L responses will be converted into a utility score using the most recent preference-  
42  
43 419 weights generated from an Australian general population sample (41). Self-reported data  
44  
45 420 relating to the number and type of health resources used will be collected at each  
46  
47 421 measurement point. Unit costs for visits to health professionals (GP, practice nurses,  
48  
49 422 physiotherapists etc) will be sourced from the Medical Benefits Schedule (42). Unit costs for  
50  
51 423 any inpatient stays and outpatient visits will be sourced from standard Australian public  
52  
53 424 sector hospital costs (43). Unit costs for prescriptions will be sourced from Pharmaceutical  
54  
55  
56  
57  
58  
59  
60

1  
2  
3 425 Benefits Schedule (PBS) (44). Given uncertainty around parameters such as unit costs and  
4  
5 426 utility values for calculating QALYs, we will undertake sensitivity analysis to check the  
6  
7 427 robustness of the estimates.  
8  
9

#### 10 428 **Data Management**

11  
12  
13  
14 429 Locked cabinets in the participating Universities will be used to store hard copy data and no  
15  
16 430 identifying information will be included. A file aligning ID codes with participants' identifying  
17  
18 431 information will be stored on the University server in a password-protected computer file. Only  
19  
20 432 members of the research team will be able to access the physical and electronic data files.  
21  
22  
23

#### 24 433 **Adverse Events**

25  
26  
27 434 Coaches will be instructed to report any adverse events during the program sessions to  
28  
29 435 the local trial co-ordinator, using a standardised form. Serious adverse events will be defined  
30  
31 436 as a medical event believed by the investigators to be attributable to participation in the Aussie-  
32  
33 437 FIT program, based on the participant's previous medical conditions and clinical presentation.  
34  
35  
36 438 Participants will also be asked to report any adverse events to the coach.  
37  
38  
39

#### 40 439 **Ethics and Dissemination**

41  
42  
43 440 This multi-site study has been approved by the lead ethics committees in the lead site's  
44  
45 441 jurisdiction, the South Metropolitan Health Service Human Research Ethics Committee  
46  
47 442 (Reference RGS4254) and the West Australian Aboriginal Health Ethics Committee  
48  
49 443 (HREC1221). Reciprocal approvals have been sought from the relevant ethics bodies in the  
50  
51 444 partner site's jurisdictions. All participants will read an electronic participant information sheet  
52  
53 445 and offered a hard or electronic copy to keep. They will be asked to electronically indicate  
54  
55 446 consent before the program enrolment and will be offered a digital or paper copy of their  
56  
57  
58  
59  
60

1  
2  
3 447 consent form. The study will be disseminated to the academic community, via publication in  
4  
5 448 peer-review journals, presentations at conferences and reports.  
6  
7

## 8 449 **Discussion**

9  
10  
11  
12 450 In 2022, CVD was the leading cause of burden of disease in Australia, and this burden  
13  
14 451 is higher in males than females (45). Insufficient physical activity and poor diet are key  
15  
16 452 modifiable behavioural CVD risk factors. Pilot and feasibility studies of Aussie-FIT have  
17  
18 453 illustrated that the program is acceptable to men in WA, and feasible to deliver in AFL and  
19  
20 454 West Australian Football League clubs and rugby league clubs in QLD. Scale up of Aussie-  
21  
22 455 FIT in WA, and out to other States and Territories creates an opportunity to reduce primary  
23  
24 456 and secondary CVD risk among men with or at risk of CVD via modification of PA and dietary  
25  
26 457 behaviours. Via this hybrid effectiveness-implementation trial, we will determine whether the  
27  
28 458 program is effective in improving health and health behaviours in men who take part, and test  
29  
30 459 strategies to sustain longer term implementation of this program.  
31  
32  
33  
34  
35  
36  
37  
38  
39  
40  
41  
42  
43  
44  
45  
46  
47  
48  
49  
50  
51  
52  
53  
54  
55  
56  
57  
58  
59  
60



## 460 **Abbreviations**

461 Aussie-FIT: Australian Fans in Training

462 FFIT: Football Fans in Training

463 BMI: Body mass index

464 CVD: Cardiovascular disease

465 MVPA: Moderate and vigorous physical activity

466 PA: Physical Activity

## 467 **Trial Registration**

468 The trial has been registered with Australian and New Zealand Clinical Trials Registry  
469 (ACTRN12623000437662), prior to recruitment of the first participant (trial registration date  
470 28 March 2023). Results will be written up and published and will be available in an open  
471 access journal or via the Open Science Framework.

## 472 **Funding**

473 This work was supported by a 2021 Behaviour Change Strategic Grant (Award ID number  
474 106534) from the National Heart Foundation of Australia.

## 475 **Author Contributions**

476 EQ, AM, GH, JS, TP, TM, DK, DAK, JM, KH, LW and HG conceived the project and obtained  
477 the project funding. EQ, MDM, AM, KH, JCM, DK, DAK, JC, TP, LW, JS, BB, BS, SH and  
478 MM have made conceptual contributions to project design with opportunities for input from  
479 all authors. Specifically, JCM, MDM, EQ and KH designed the implementation strategies. EQ,  
480 MDM, KH, and AM designed trial recruitment strategies and screening and assessment

1  
2  
3 481 protocols. TP, JMcV, and EQ designed the physical activity data analysis plan. SH, MDM, EQ,  
4  
5 482 DAK, and DK updated the intervention materials, with input from BB, JB, NW, TP, AM. EQ,  
6  
7 483 BS, AM, and MDM prepared the main ethics submission. EQ, BB, JS, and JB prepared the  
8  
9 484 trial procedures and ethics submission for involvement of men who identify as Aboriginal  
10  
11 485 and/or Torres Strait Islanders. MDM, BB, JS, and JB designed the project consumer  
12  
13 486 involvement strategies. HC conducted the power analysis and designed the statistical analysis  
14  
15 487 plan. MM designed the economic evaluation. TP, LW, JS and BB prepared ethics submissions  
16  
17 488 for reciprocal ethics from local State/Territory committees. EQ and MDM drafted the  
18  
19 489 manuscript and all authors read, edited, and approved the final version of the manuscript.  
20  
21  
22  
23

#### 24 490 **Competing Interests**

25  
26  
27 491 N/A  
28  
29  
30

#### 31 492 **Acknowledgements**

32  
33  
34 493 The research on which this article is based was conducted as part of the Aussie-FIT: Kicking  
35  
36 494 Goals for Men's Heart Health Project. This work was supported by a 2021 Behaviour Change  
37  
38 495 Strategic Grant (Award ID number 106534) from the National Heart Foundation of Australia  
39  
40 496 (contact email Pagw 3research@heartfoundation.org.au). Aussie-FIT builds on the FFIT  
41  
42 497 program, the development and evaluation of which was undertaken by a research team led by  
43  
44 498 the University of Glasgow with funding from various grants including a Medical Research  
45  
46 499 Council (MRC) grant (reference number MC\_UU\_12017/3), a Chief Scientist Office (CSO)  
47  
48 500 grant (reference number CZG/2/504), and a National Institute for Health Research grant  
49  
50 501 (NIHR) (reference number 09/3010/06). The development and evaluation of FFIT was  
51  
52 502 facilitated through partnership working with the Scottish Professional Football League Trust  
53  
54 503 (SPFLT). We thank the stakeholder and consumer advisory group members for their  
55  
56 504 contributions to the development of this protocol.  
57  
58  
59  
60

1  
2  
3 **506 Tables and Figures**  
4

5 507 Table 1 – Intervention description aligned with the Template for Intervention Description  
6  
7 508 and Replication (TIDieR) guidance  
8  
9

10 509 Table 2 – Summary of measures used in the Aussie-FIT trial and program evaluation and  
11  
12  
13 510 time points  
14  
15

16 511 Table 3 – Intervention content in each of the 12 sessions  
17  
18

19 512 Figure 1 – Consort diagram of participant flow through the trial  
20  
21  
22

23 513  
24  
25

26 514  
27  
28  
29  
30  
31  
32  
33  
34  
35  
36  
37  
38  
39  
40  
41  
42  
43  
44  
45  
46  
47  
48  
49  
50  
51  
52  
53  
54  
55  
56  
57  
58  
59  
60

**Table 1.** Intervention description aligned with the Template for Intervention Description and Replication (TIDieR) guidance

**TIDieR Checklist Item**

|                          |                                                                                                                                                                                                                                                                                                                                                                                                                                                                                                                                                                                                                                                                                                                                                                                                                                                                                                                                                                                                                                                                                                                                                                                                                                                                                                                                                                                                                                                                                                                                                                                                                                                                                             |
|--------------------------|---------------------------------------------------------------------------------------------------------------------------------------------------------------------------------------------------------------------------------------------------------------------------------------------------------------------------------------------------------------------------------------------------------------------------------------------------------------------------------------------------------------------------------------------------------------------------------------------------------------------------------------------------------------------------------------------------------------------------------------------------------------------------------------------------------------------------------------------------------------------------------------------------------------------------------------------------------------------------------------------------------------------------------------------------------------------------------------------------------------------------------------------------------------------------------------------------------------------------------------------------------------------------------------------------------------------------------------------------------------------------------------------------------------------------------------------------------------------------------------------------------------------------------------------------------------------------------------------------------------------------------------------------------------------------------------------|
| <b>Why</b>               | Undertaking sufficient physical activity and healthy eating are critical to prevent people with lived experience of or at-risk of cardiovascular disease (CVD) from experiencing future heart problems. However, most people with or at-risk of CVD fail to initiate or sustain these health behaviours long-term. This increases risks of future heart conditions and premature death. CVD is more common in men, but they are less likely than women to access interventions to help them manage their weight or improve their health behaviours.                                                                                                                                                                                                                                                                                                                                                                                                                                                                                                                                                                                                                                                                                                                                                                                                                                                                                                                                                                                                                                                                                                                                         |
| <b>What (materials)</b>  | Men participating will receive: a wrist worn physical activity monitor, a sports club team shirt, and a participant workbook with educational content about nutrition, physical activity, and health behaviour change (which is also covered in the face-to-face sessions). Coaches will receive a detailed intervention delivery guide and educational resources (e.g., wallet cards to assess food labels) to support delivery of the weekly sessions. Coaches will utilise sports equipment (e.g., AFL and rugby league balls) from their respective clubs. The participant workbook and coach session delivery guides have previously been used in the Aussie-FIT pilot studies. The participant workbook and coach session delivery guide were developed (and educational materials sourced), adapted from resources available from: i) Football Fans in Training program, <a href="http://www.ffit.org.uk">www.ffit.org.uk</a> ; Heart Foundation Australia, <a href="http://www.heartfoundation.org.au">www.heartfoundation.org.au</a> ; Australian Government Department of Health, National Health and Medical Research Council, <a href="http://www.eatforhealth.gov.au">www.eatforhealth.gov.au</a> ; Alcohol Think Again, <a href="http://www.alcoholthinkagain.com.au">www.alcoholthinkagain.com.au</a> ; and Cancer Council WA, <a href="http://www.cancerwa.asn.au">www.cancerwa.asn.au</a> . Minor adaptations have been made to these resources to reflect the target population (men with or at-risk of CVD) and the primary outcome (physical activity) in this trial, and to incorporate consumer and stakeholder feedback in WA, QLD, and the Northern Territory (NT). |
| <b>What (procedures)</b> | Participants will attend 12 group sessions at their club that incorporates physical activity, and workshop style education. The education involves practical activities and discussions to help men understand why and how to improve their diet (e.g., interpreting food labels, portion sizes, meal planning, eating out) and physical activity habits (e.g., understanding exercise intensities, safe strength training, decreasing sedentary time). Men will be encouraged to use behaviour change techniques (e.g., self-monitoring, goal setting, and problem solving) to help put the recommendations into practice. Participants take part in physical activity within the sessions that starts off slowly in the initial weeks and gradually builds up over the course of the program. Activities men participate in include ball skills and circuit training similar to that undertaken by Australian football and rugby league players but modified to be safe for each man’s abilities (e.g., ball skill drills restricted to walking). Men are encouraged to self-monitor walking, gradually increasing steps/day throughout the 12-weeks.                                                                                                                                                                                                                                                                                                                                                                                                                                                                                                                                     |
| <b>Who provides</b>      | Coaches will be recruited from ten sports clubs in Perth, Darwin, and Brisbane. Aussie-FIT coaches will be already embedded in their respective clubs, knowledgeable about Australian Football or Rugby League, and have experience of leading physical activity or sports coaching sessions. Coaches should have good communication skills and the ability to help foster a supportive atmosphere with camaraderie between participants. Accredited Exercise Physiologists (AEPs), or other suitably qualified/accredited health                                                                                                                                                                                                                                                                                                                                                                                                                                                                                                                                                                                                                                                                                                                                                                                                                                                                                                                                                                                                                                                                                                                                                           |

|                          |                                                                                                                                                                                                                                                                                                                                                                                                                                                                                                                                                                                                                                                                                                                                                                                                                                                                                                                                                                                                                                                                                                                                                                                                                                                                                                                                                                                                                                                         |
|--------------------------|---------------------------------------------------------------------------------------------------------------------------------------------------------------------------------------------------------------------------------------------------------------------------------------------------------------------------------------------------------------------------------------------------------------------------------------------------------------------------------------------------------------------------------------------------------------------------------------------------------------------------------------------------------------------------------------------------------------------------------------------------------------------------------------------------------------------------------------------------------------------------------------------------------------------------------------------------------------------------------------------------------------------------------------------------------------------------------------------------------------------------------------------------------------------------------------------------------------------------------------------------------------------------------------------------------------------------------------------------------------------------------------------------------------------------------------------------------|
|                          | professionals will act as an assistant coach and co-facilitate program delivery. They will support the coach by undertaking any required health monitoring of participants (e.g., blood pressure checks), provide advice on safe exercise and provide first aid, if required. Club coaches and AEPs will be trained by the research team in the core program content (physical activity, nutrition, motivation, behaviour change). The training is delivered face-to-face and comprises approximately 15 hours of interactive learning content and opportunities to practice session deliveries and receive feedback from the research team and peers.                                                                                                                                                                                                                                                                                                                                                                                                                                                                                                                                                                                                                                                                                                                                                                                                  |
| <b>How</b>               | The intervention will be delivered face-to-face to groups of approximately 16 men. Coaches are encouraged to utilise a communication style that supports psychological need satisfaction for autonomy, competence, and relatedness in relation to physical activity and eating behaviours.                                                                                                                                                                                                                                                                                                                                                                                                                                                                                                                                                                                                                                                                                                                                                                                                                                                                                                                                                                                                                                                                                                                                                              |
| <b>Where</b>             | The program will be delivered in Australian Football (WA and NT) and rugby league (QLD) settings. This will include a suitable space for the educational program component (e.g., indoor clubroom) and access to the pitch/oval for physical activity. In some circumstances, outdoor spaces may be utilised to deliver the educational content and indoor spaces may be used for physical activity (e.g., if there is gym access, or in adverse weather conditions).                                                                                                                                                                                                                                                                                                                                                                                                                                                                                                                                                                                                                                                                                                                                                                                                                                                                                                                                                                                   |
| <b>When and how much</b> | Participants will attend twelve, weekly, 90-minute sessions. Aussie-FIT encourages gradual increases in moderate to vigorous physical activity levels outside of the weekly sessions in daily life.                                                                                                                                                                                                                                                                                                                                                                                                                                                                                                                                                                                                                                                                                                                                                                                                                                                                                                                                                                                                                                                                                                                                                                                                                                                     |
| <b>Tailoring</b>         | The Aussie-FIT sessions and resources are informed by the best available evidence and population recommendations for age and CVD risk management (e.g., Australian guide to healthy eating, physical activity guidelines, and National Heart Foundation recommendations). The program is not prescriptive in terms of physical activity and dietary changes the men make outside of the weekly sessions. Men are supported to self-monitor their diet and physical activity behaviours, then make their own education-informed decisions on setting goals that are relevant to them. Health behaviour change goals that are self-determined are more likely to be sustainable. Personalised feedback on goals men set is provided by coaches and peers in weekly sessions throughout the program. Targeted behaviours for goal setting include portion size control, reduction of sugary drinks and energy dense foods, reduction in alcohol consumption, gradual increases in physical activity and reduced sedentary time. Men participating in Aussie-FIT will have varying physical fitness levels and health conditions. Throughout the program AEPs and coaches will modify the physical activity within the sessions to suit men with differing physical capabilities. AEPs and coaches will be aware of pre-existing conditions and will interact with and observe participants during the program sessions, and tailor activities as required. |

**Table 2.** Summary of measures used in the Aussie-FIT trial and program evaluation and time points

| Measurement instrument                                                                                                                             |                                                                                                                                                                                                                                                                                                                                                                                                                                                                                                                                                                                                                                                                                                                                                                    | Baseline | 3 months | 6 month* |
|----------------------------------------------------------------------------------------------------------------------------------------------------|--------------------------------------------------------------------------------------------------------------------------------------------------------------------------------------------------------------------------------------------------------------------------------------------------------------------------------------------------------------------------------------------------------------------------------------------------------------------------------------------------------------------------------------------------------------------------------------------------------------------------------------------------------------------------------------------------------------------------------------------------------------------|----------|----------|----------|
| <b>Objective measures</b> (collected at the measurement sessions at football clubs by members of the research team or trained research assistants) |                                                                                                                                                                                                                                                                                                                                                                                                                                                                                                                                                                                                                                                                                                                                                                    |          |          |          |
| PA and sedentary time                                                                                                                              | Participants will also be asked to wear an Actigraph GTX9 (ActiGraph LLC, Pensacola, FL) monitor continuously for 7-days on their non-dominant wrist at each data collection time-point to provide a valid and reliable assessment of PA (30). The GT9X is a small (3.5 × 3.5 × 1 cm), lightweight (14 g), and waterproof tri-axial accelerometer. The monitors will be initialised to collect data at a 30hz sampling rate. Men will be provided with written instructions for wearing the Actigraph.                                                                                                                                                                                                                                                             | X        | X        | X        |
| Weight                                                                                                                                             | Weight in kilograms measured with valid and reliable body scale (e.g., Tanita); light clothing, no shoes and empty pockets; assessor blinded to condition                                                                                                                                                                                                                                                                                                                                                                                                                                                                                                                                                                                                          | X        | X        | X        |
| Height                                                                                                                                             | Height measured in centimetres using a stadiometer (e.g., Seca); without shoes                                                                                                                                                                                                                                                                                                                                                                                                                                                                                                                                                                                                                                                                                     | X        |          |          |
| BMI                                                                                                                                                | Calculated as weight in kilograms divided by the square of height in metres (kg/m <sup>2</sup> )                                                                                                                                                                                                                                                                                                                                                                                                                                                                                                                                                                                                                                                                   | X        | X        | X        |
| Waist circumference                                                                                                                                | Waist circumference is measured twice using a tape measure (three times, if the first two measurements differ by 5 mm or more) and the mean of all recorded measurements calculated. The participant is asked to locate the last rib and iliac crest, and the measure is performed at the midpoint between these to locate the waist. If the man cannot locate his last rib and iliac crest the researcher can ask the man to identify where his belly button is and the measurement can occur one inch/3cm or width of two fingers above where man has indicated. If the first two measurements differ by 5 mm or more, measure third time.                                                                                                                       | X        | X        | X        |
| Resting systolic and diastolic blood pressure                                                                                                      | Resting blood pressure measured with a digital blood pressure monitor (Omron HBP-1320, Milton Keynes, UK) monitor after 5 min sitting still. If measured systolic blood pressure is over 150 mmHg and/or measured diastolic blood pressure is over 95 mmHg, two further measures will be taken and recorded. If blood pressure remains high the man will be provided with a letter explaining the circumstances in which they had their blood pressure measured and recorded and they will be encouraged to consult their GP. A mean will be calculated from the second and third measures. Feet flat on the floor, arm free of clothing or wearing loose/thin clothing, cuff at the level of heart and arm resting, same arm used (non-dominant arm), no talking. | X        | X        | X        |

|    |                                                                                                                                                          |                                                                                         |   |   |   |
|----|----------------------------------------------------------------------------------------------------------------------------------------------------------|-----------------------------------------------------------------------------------------|---|---|---|
| 1  |                                                                                                                                                          |                                                                                         |   |   |   |
| 2  | Cholesterol                                                                                                                                              | Cholesterol will be check using handheld point of care device (Accutrend Plus) that     | X | X | X |
| 3  |                                                                                                                                                          | measures cholesterol immediately.                                                       |   |   |   |
| 4  | <b>Self-reported measures</b> (completed at the measurement sessions at football clubs or online in the participant's own time, depending on preference) |                                                                                         |   |   |   |
| 5  | Food intake                                                                                                                                              | Intake24 is an open-source self-completed computerised dietary recall system based      | X | X | X |
| 6  |                                                                                                                                                          | on multiple-pass 24-hour recall. A trained interviewer will assist participants who     |   |   |   |
| 7  |                                                                                                                                                          | may request assistance to complete the recall.[14, 15]                                  |   |   |   |
| 8  | Positive and negative                                                                                                                                    | The Short Form of the positive and negative affect scale (PANAS) (46)                   | X | X | X |
| 9  | affect                                                                                                                                                   |                                                                                         |   |   |   |
| 10 | Self-esteem                                                                                                                                              | The Rosenberg Self-Esteem (RSE) scale (47)                                              | X | X | X |
| 11 | Quality of life                                                                                                                                          | The health-related quality of life measured using the EQ-5D-5 L (39)                    | X | X | X |
| 12 |                                                                                                                                                          |                                                                                         |   |   |   |
| 13 | Demographics                                                                                                                                             | Age, ethnicity, education, marital status, current employment status, income, housing   | X |   |   |
| 14 |                                                                                                                                                          | status                                                                                  |   |   |   |
| 15 | Motivation                                                                                                                                               | Motivation to be physically active (48)                                                 | X | X | X |
| 16 | Automaticity                                                                                                                                             | The 'Self-Report Behavioural Automaticity Index' (49)                                   | X | X | X |
| 17 | Goal conflict,                                                                                                                                           | Goal conflict and goal facilitation scale (50)                                          | X | X | X |
| 18 | facilitation                                                                                                                                             |                                                                                         |   |   |   |
| 19 | Action and coping                                                                                                                                        | Action planning and copying planning scale (51)                                         | X | X | X |
| 20 | planning                                                                                                                                                 |                                                                                         |   |   |   |
| 21 | <b>Self-reported programme evaluation measures</b>                                                                                                       |                                                                                         |   |   |   |
| 22 | Recruitment                                                                                                                                              | How participants found out about the programme; programme uptake (number of             | X |   |   |
| 23 |                                                                                                                                                          | people who expressed interest; number of people who fit inclusion criteria)             |   |   |   |
| 24 |                                                                                                                                                          |                                                                                         |   |   |   |
| 25 | Programme evaluation:                                                                                                                                    | Attendance to programme sessions and to measurement sessions; fidelity of               |   |   |   |
| 26 | via questionnaires and                                                                                                                                   | programme delivery; perceptions of effectiveness and acceptability, assessed using      |   |   |   |
| 27 | interviews                                                                                                                                               | the program evaluation questionnaire, which is adapted from the original Aussie-FIT     |   |   |   |
| 28 |                                                                                                                                                          | program. Interviews with participants, coaches and AEPs will also provide further       |   |   |   |
| 29 |                                                                                                                                                          | data on these points.                                                                   |   |   |   |
| 30 | Training evaluation: via                                                                                                                                 | Coaches will evaluate the training provided to them by completing the coach training    |   |   |   |
| 31 | questionnaires and                                                                                                                                       | evaluation questionnaire on completing their training. The interviews will also ask the |   |   |   |
| 32 | interviews                                                                                                                                               | coaches about their training.                                                           |   |   |   |
| 33 |                                                                                                                                                          |                                                                                         |   |   |   |
| 34 |                                                                                                                                                          |                                                                                         |   |   |   |
| 35 |                                                                                                                                                          |                                                                                         |   |   |   |
| 36 |                                                                                                                                                          |                                                                                         |   |   |   |
| 37 |                                                                                                                                                          |                                                                                         |   |   |   |
| 38 |                                                                                                                                                          |                                                                                         |   |   |   |
| 39 | <i>Note.</i> * and 12 months, for intervention group only                                                                                                |                                                                                         |   |   |   |
| 40 |                                                                                                                                                          |                                                                                         |   |   |   |
| 41 |                                                                                                                                                          |                                                                                         |   |   |   |
| 42 |                                                                                                                                                          |                                                                                         |   |   |   |
| 43 |                                                                                                                                                          |                                                                                         |   |   |   |
| 44 |                                                                                                                                                          |                                                                                         |   |   |   |
| 45 |                                                                                                                                                          |                                                                                         |   |   |   |
| 46 |                                                                                                                                                          |                                                                                         |   |   |   |

**Table 3.** Intervention content

| <b>Week number and session title</b>                                          | <b>Motivation and behaviour change</b>                                                                                                                                                                             | <b>Nutrition component</b>                                                                                                                  | <b>Physical activity education component</b>                                                                                                                                        | <b>Practical physical activity</b>                            |
|-------------------------------------------------------------------------------|--------------------------------------------------------------------------------------------------------------------------------------------------------------------------------------------------------------------|---------------------------------------------------------------------------------------------------------------------------------------------|-------------------------------------------------------------------------------------------------------------------------------------------------------------------------------------|---------------------------------------------------------------|
| <b>Session 1.</b><br>Motivation and monitoring progress                       | Motivation (identifying and developing higher quality motives);<br>Monitoring progress, 'your activity' and 'your weight' progress records.<br><b>Action Point:</b> Track daily step count and complete food diary | Energy balance (intake vs output)                                                                                                           | Handing out activity monitors and explaining how to use them<br>Walking for wellbeing<br>Exercising safely for men with cardiovascular disease                                      | Short tour of the oval wearing activity monitors              |
| <b>Session 2.</b> Steps towards better heart health and setting goals         | Food diaries compared with healthy eating recommendations and changes going forward; Changing unhealthy environmental triggers; Education on setting; SMART goals                                                  | Heart Foundation five key nutrition messages, food groups and eating healthier; Balanced plate (vegetables, wholegrains and protein)        | PA for heart health; Baseline step counts determined; Understanding how to increase step count gradually; Setting step count goals                                                  | Walking around the oval                                       |
| <b>Session 3.</b> Planning, food labels and physical activity recommendations | SMART goals review; Action planning and coping planning                                                                                                                                                            | How to read food labels                                                                                                                     | PA recommendations, benefits, types and intensities; Pros and cons of PA; Overcoming barriers to being physical inactive; Reviewing steps and thinking about alternative activities | Introduction of warming up, cooling down and aerobic exercise |
| <b>Session 4.</b><br>Reviewing SMART goals, healthy swaps and small changes   | Reviewing goals<br>SMART goal to reduce junk food<br>Motivation and staying on track<br>Importance of support from others                                                                                          | Junk foods impact on heart health; Allowing yourself to be flexible; Healthy snacks and heart healthy food swaps; reducing junk food intake | Being active every day and sitting less                                                                                                                                             | Aerobic exercise with warm up and cool down                   |
| <b>Session 5.</b><br>Reviewing plans and cutting down on booze                | Reviewing goals                                                                                                                                                                                                    | Pros and cons of drinking alcohol; Facts about alcohol; Alcohol standard drinks, recommendations                                            | Reviewing steps and alternative activities                                                                                                                                          | Aerobic exercise with warm up and cool down                   |



|                                                                          |                                                                                                                                                                        |                                                                                                     |                                                                                                                                                                        |                                                                                                              |
|--------------------------------------------------------------------------|------------------------------------------------------------------------------------------------------------------------------------------------------------------------|-----------------------------------------------------------------------------------------------------|------------------------------------------------------------------------------------------------------------------------------------------------------------------------|--------------------------------------------------------------------------------------------------------------|
| <b>Session 6.</b> Key factors to maintain health behaviour               | Five key factors to maintain health behaviour; Sharing experiences on setbacks; Introduction to setbacks and tactics for dealing with them                             |                                                                                                     | Learning principles of body weight strength training; Reviewing steps and alternative activities; Introducing mobile applications for exercise                         | Strength exercises for major muscle groups with warm up and cool down                                        |
| <b>Session 7.</b> Progress and staying on track                          | Representation of step increases achieved; SMART goals reviewed; Reviewing how things are going so far and problem solving; Compensatory behaviours; Staying on track. |                                                                                                     | Reviewing steps and alternative activities<br>Tips to increase PA, being active every day and decrease sitting time; Principles of stretching and flexibility training | Warming up and flexibility training<br>Strength exercises for major muscle groups with warm up and cool down |
| <b>Session 8.</b> Facts about fat, salt and sugar                        | Importance of developing eating routines and habits; How to choose healthier packet foods                                                                              | Facts about fat, salt and sugar for heart health; Healthier fat alternatives; Added sugar in drinks | Reviewing steps and alternative activities                                                                                                                             | Aerobic, strength and flexibility activities inc. sport drills                                               |
| <b>Session 9.</b> Physical activity habits and healthier ways to eat out | Developing PA habits                                                                                                                                                   | Choosing healthier food choices when having takeaway or eating out                                  | Reviewing steps and activity review                                                                                                                                    | Aerobic, strength and flexibility activities inc. sport drills                                               |
| <b>Session 10.</b> Healthy cooking at home                               | Reviewing goals; Triggers for setbacks and how to avoid them<br><b>Action Point:</b> Complete food diary to bring next week                                            | Healthy living and busting myths; Healthy cooking and food preparation at home                      | Step count and activity review                                                                                                                                         | Aerobic, strength and flexibility activities inc. sport drills                                               |
| <b>Session 11.</b> Reviewing progress and acknowledging achievements     | Revision of food diaries; Revision of eating plans; Behaviour control and staying on track; Revision of SMART goals                                                    |                                                                                                     | PA levels, types, positives and challenges<br>Reviewing steps and alternative activities                                                                               | Aerobic, strength and flexibility activities inc. sport drills                                               |
| <b>Session 12.</b> Looking ahead towards maintaining a healthy lifestyle | Reviewing progress throughout the program; Celebrating achievements; Determining steps after the program                                                               | Tips to maintaining nutrition habits for heart health                                               | Tips to maintaining PA habits                                                                                                                                          | AFL or rugby game                                                                                            |

**Note.** Session one also includes general introductory content including Aim and overview of the Aussie-FIT program, getting to know each other activities, creating group ground rules and Facebook group sign-ups. Rapport building activities are also incorporated into each weekly session

## References

1. Australian Bureau of Statistics. National Health Survey: first results, 2017–18. 2018.
2. Rippe JM. Lifestyle Strategies for Risk Factor Reduction, Prevention, and Treatment of Cardiovascular Disease. *Am J Lifestyle Med.* 2018 Dec 2;13(2):204–12.
3. Flora PK, McMahon CJ, Locke SR, Brawley LR. Perceiving Cardiac Rehabilitation Staff as Mainly Responsible for Exercise: A Dilemma for Future Self-Management. *Applied Psychology: Health and Well-Being.* 2018;10(1):108–26.
4. De Gruyter E, Ford G, Stavreski B. Economic and Social Impact of Increasing Uptake of Cardiac Rehabilitation Services – A Cost Benefit Analysis. *Heart, Lung and Circulation.* 2016 Feb 1;25(2):175–83.
5. Walli-Attaei M, Joseph P, Rosengren A, Chow CK, Rangarajan S, Lear SA, et al. Variations between women and men in risk factors, treatments, cardiovascular disease incidence, and death in 27 high-income, middle-income, and low-income countries (PURE): a prospective cohort study. *The Lancet.* 2020 Jul 11;396(10244):97–109.
6. Sharp P, Spence JC, Bottorff JL, Oliffe JL, Hunt K, Vis-Dunbar M, et al. One small step for man, one giant leap for men’s health: a meta-analysis of behaviour change interventions to increase men’s physical activity. *Br J Sports Med.* 2020 Oct 1;54(20):1208–16.
7. Hunt K, Wyke S, Gray CM, Anderson AS, Brady A, Bunn C, et al. A gender-sensitised weight loss and healthy living programme for overweight and obese men delivered by Scottish Premier League football clubs (FFIT): a pragmatic randomised controlled trial. *The Lancet.* 2014 Apr 5;383(9924):1211–21.
8. Quested E, Kwasnicka D, Thøgersen-Ntoumani C, Gucciardi DF, Kerr DA, Hunt K, et al. Protocol for a gender-sensitised weight loss and healthy living programme for overweight and obese men delivered in Australian football league settings (Aussie-FIT): A feasibility and pilot randomised controlled trial. *BMJ Open.* 2018 Oct;8(10):e022663.
9. Gray CM, Wyke S, Zhang R, Anderson AS, Barry S, Boyer N, et al. Long-term weight loss trajectories following participation in a randomised controlled trial of a weight management programme for men delivered through professional football clubs: a longitudinal cohort study and economic evaluation. *International Journal of Behavioral Nutrition and Physical Activity.* 2018 Jun 28;15(1):60.
10. Wyke S, Bunn C, Andersen E, Silva MN, Nassau F van, McSkimming P, et al. The effect of a programme to improve men’s sedentary time and physical activity: The European Fans in Training (EuroFIT) randomised controlled trial. *PLOS Medicine.* 2019 Feb 5;16(2):e1002736.
11. Kwasnicka D, Ntoumanis N, Hunt K, Gray CM, Newton RU, Gucciardi DF, et al. A gender-sensitised weight-loss and healthy living program for men with overweight and obesity in Australian Football League settings (Aussie-FIT): A pilot randomised controlled trial. *PLOS Medicine.* 2020 Aug 6;17(8):e1003136.
12. Pavey T, Wharton L, Polman R, Hunt K, Gray CM, Quested E. A rugby league weight loss program for men–League-FIT: Preliminary results from a pilot study. *Journal of Science and Medicine in Sport.* 2022;25:S78-9.

13. Australian Institute of Health and Welfare. Heart, stroke and vascular disease —Australian facts [Internet]. Australian Institute of Health and Welfare; 2023 [cited 2023 Apr 23]. Available from: <https://www.aihw.gov.au/reports/heart-stroke-vascular-diseases/hsvd-facts/contents/about>
14. Australian Institute of Health and Welfare. Overweight and obesity. 2023; Available from: <https://www.aihw.gov.au/reports/overweight-obesity/overweight-and-obesity/contents/summary>
15. George ES, El Masri A, Kwasnicka D, Romeo A, Cavallin S, Bennie A, et al. Effectiveness of Adult Health Promotion Interventions Delivered Through Professional Sport: Systematic Review and Meta-Analysis. *Sports Med.* 2022 Nov 1;52(11):2637–55.
16. Milat AJ, King L, Bauman AE, Redman S. The concept of scalability: increasing the scale and potential adoption of health promotion interventions into policy and practice. *Health Promotion International.* 2013 Sep 1;28(3):285–98.
17. Moullin JC, Dickson KS, Stadnick NA, Albers B, Nilsen P, Broder-Fingert S, et al. Ten recommendations for using implementation frameworks in research and practice. *Implement Sci Commun.* 2020 Apr 30;1(1):42.
18. Curran GM, Landes SJ, McBain SA, Pyne JM, Smith JD, Fernandez ME, et al. Reflections on 10 years of effectiveness-implementation hybrid studies. *Frontiers in Health Services* [Internet]. 2022 [cited 2023 May 6];2. Available from: <https://www.frontiersin.org/articles/10.3389/frhs.2022.1053496>
19. Curran GM, Bauer M, Mittman B, Pyne JM, Stetler C. Effectiveness-implementation Hybrid Designs. *Med Care.* 2012 Mar;50(3):217–26.
20. Pinnock H, Barwick M, Carpenter CR, Eldridge S, Grandes G, Griffiths CJ, et al. Standards for Reporting Implementation Studies (StaRI) Statement. *BMJ.* 2017 Mar 6;356:i6795.
21. Glasgow RE, Vogt TM, Boles SM. Evaluating the public health impact of health promotion interventions: the RE-AIM framework. *Am J Public Health.* 1999 Sep;89(9):1322–7.
22. National, state and territory population, September 2022 | Australian Bureau of Statistics [Internet]. 2023 [cited 2023 May 26]. Available from: <https://www.abs.gov.au/statistics/people/population/national-state-and-territory-population/latest-release>
23. Australia: Aboriginal and Torres Strait Islander population summary | Australian Bureau of Statistics [Internet]. 2022 [cited 2023 May 26]. Available from: <https://www.abs.gov.au/articles/australia-aboriginal-and-torres-strait-islander-population-summary>
24. AusPlay results | Clearinghouse for Sport [Internet]. [cited 2023 May 26]. Available from: <https://www.clearinghouseforsport.gov.au/research/ausplay/results#sportreport>
25. Parker, C., Scott, S. and Geddes, A. (2019) Snowball Sampling. *SAGE Research Methods Foundations.* - References - Scientific Research Publishing [Internet]. [cited 2023 May 26]. Available from: [https://www.scirp.org/\(S\(czeh2tfqw2orz553k1w0r45\)\)/reference/referencespapers.aspx?referenceid=3131783](https://www.scirp.org/(S(czeh2tfqw2orz553k1w0r45))/reference/referencespapers.aspx?referenceid=3131783)

- 1  
2 26. Trial Forge Guidance 1: what is a Study Within A Trial (SWAT)? | Trials | Full Text  
3 [Internet]. [cited 2023 May 26]. Available from:  
4 <https://trialsjournal.biomedcentral.com/articles/10.1186/s13063-018-2535-5>  
5
- 6 27. McDonald MD, Moullin JC, Queded E. MRC Hubs for Trials Methodology: The Northern  
7 Ireland Hub for Trials Methodology Research, SWAT Store, SWAT 208: Comparative  
8 Effectiveness of a Self-Directed Online versus a Phone Call Enrolment Process. [Internet]. [cited  
9 2023 Jun 20]. Available from:  
10 <https://www.qub.ac.uk/sites/TheNorthernIrelandNetworkforTrialsMethodologyResearch/FileStorage/Fileupload,1862717,en.pdf>  
11  
12  
13
- 14 28. Hoffmann TC, Glasziou PP, Boutron I, Milne R, Perera R, Moher D, et al. Better reporting  
15 of interventions: template for intervention description and replication (TIDieR) checklist and  
16 guide. *BMJ*. 2014 Mar 7;348:g1687.  
17
- 18 29. Dowd KP, Szeklicki R, Minetto MA, Murphy MH, Polito A, Ghigo E, et al. A systematic  
19 literature review of reviews on techniques for physical activity measurement in adults: a  
20 DEDIPAC study. *Int J Behav Nutr Phys Act*. 2018 Feb 8;15:15.  
21  
22
- 23 30. Pre-Exercise Screening Systems [Internet]. [cited 2023 Sep 11]. Available from:  
24 [https://www.essa.org.au/Public/Public/ABOUT\\_ESSA/Pre-Exercise\\_Screening\\_Systems.aspx](https://www.essa.org.au/Public/Public/ABOUT_ESSA/Pre-Exercise_Screening_Systems.aspx)  
25
- 26 31. Sabia S, van Hees VT, Shipley MJ, Trenell MI, Hagger-Johnson G, Elbaz A, et al.  
27 Association between questionnaire- and accelerometer-assessed physical activity: the role of  
28 sociodemographic factors. *Am J Epidemiol*. 2014 Mar 15;179(6):781–90.  
29  
30
- 31 32. Van Hees VT, Gorzelniak L, Dean León EC, Eder M, Pias M, Taherian S, et al. Separating  
32 Movement and Gravity Components in an Acceleration Signal and Implications for the  
33 Assessment of Human Daily Physical Activity. Müller M, editor. *PLoS ONE*. 2013 Apr  
34 23;8(4):e61691.  
35
- 36 33. Hildebrand M, Van Hees VT, Hansen BH, Ekelund U. Age Group Comparability of Raw  
37 Accelerometer Output from Wrist- and Hip-Worn Monitors. *Medicine & Science in Sports &*  
38 *Exercise*. 2014 Sep;46(9):1816.  
39  
40
- 41 34. Migueles JH, Rowlands AV, Huber F, Sabia S, Hees VT van. GGIR: A Research  
42 Community–Driven Open Source R Package for Generating Physical Activity and Sleep  
43 Outcomes From Multi-Day Raw Accelerometer Data. *Journal for the Measurement of Physical*  
44 *Behaviour*. 2019 Sep 1;2(3):188–96.  
45
- 46 35. Rowlands AV, Fairclough SJ, Yates T, Edwardson CL, Davies M, Munir F, et al. Activity  
47 Intensity, Volume, and Norms: Utility and Interpretation of Accelerometer Metrics. *Medicine &*  
48 *Science in Sports & Exercise*. 2019 Nov;51(11):2410.  
49  
50
- 51 36. Mora S, Cook N, Buring JE, Ridker PM, Lee IM. Physical Activity and Reduced Risk of  
52 Cardiovascular Events. *Circulation*. 2007 Nov 6;116(19):2110–8.  
53
- 54 37. Wrist-worn accelerometers: recommending ~1.0 mg as the minimum clinically important  
55 difference (MCID) in daily average acceleration for inactive adults | *British Journal of Sports*  
56 *Medicine* [Internet]. [cited 2023 May 26]. Available from:  
57 <https://bjsm.bmj.com/content/55/14/814>  
58  
59
- 60 38. Drummond MF, Sculpher MJ, Claxton K, Stoddart GL, Torrance GW. *Methods for the Economic Evaluation of Health Care Programmes*. Oxford University Press; 2015. 461 p.

- 1  
2 39. Herdman M, Gudex C, Lloyd A, Janssen MF, Kind P, Parkin D, et al. Development and  
3 preliminary testing of the new five-level version of EQ-5D (EQ-5D-5L). *Qual Life Res.* 2011  
4 Dec 1;20(10):1727–36.  
5
- 6 40. Brazier J, Ratcliffe J, Saloman J, Tsuchiya A. *Measuring and Valuing Health Benefits for*  
7 *Economic Evaluation.* Oxford University Press; 2017. 373 p.  
8
- 9 41. Norman R, Cronin P, Viney R. A pilot discrete choice experiment to explore preferences for  
10 EQ-5D-5L health states. *Appl Health Econ Health Policy.* 2013 Jun;11(3):287–98.  
11
- 12 42. Australian Government Department of Health and Aged Care. MBS Online: Medical  
13 Benefits Schedule [Internet]. 2023a [cited 2023 Jul 26]. Available from:  
14 <http://www.mbsonline.gov.au/internet/mbsonline/publishing.nsf/Content/Home>  
15
- 16 43. Independent Health and Aged Care Pricing Authority (IHACPA). *Independent Health and*  
17 *Aged Care Pricing Authority.* 2023.  
18
- 19 44. Australian Government Department of Health and Aged Care, 2023b. *Pharmaceutical*  
20 *Benefits Scheme (PBS).* 2023b.  
21
- 22 45. Australian Institute of Health and Welfare [Internet]. 2022 [cited 2023 Jun 6]. *Australian*  
23 *Burden of Disease Study 2022, Summary.* Available from:  
24 [https://www.aihw.gov.au/reports/burden-of-disease/australian-burden-of-disease-study-](https://www.aihw.gov.au/reports/burden-of-disease/australian-burden-of-disease-study-2022/contents/summary#CHD)  
25 [2022/contents/summary#CHD](https://www.aihw.gov.au/reports/burden-of-disease/australian-burden-of-disease-study-2022/contents/summary#CHD)  
26
- 27 46. Thompson ER. Development and Validation of an Internationally Reliable Short-Form of  
28 the Positive and Negative Affect Schedule (PANAS). *Journal of Cross-Cultural Psychology.*  
29 2007 Mar 1;38(2):227–42.  
30
- 31 47. Rosenberg M. Rosenberg self-esteem scale (RSE). *Acceptance and commitment therapy*  
32 *Measures package.* 1965;61(52)(18).  
33
- 34 48. Rocchi MA, Wilson PM, Sylvester BD, Guerin E, Shi Z, Sweet SN. Toward brief tools  
35 assessing motivation for exercise: Rationale and development of a six- and 12-item version of the  
36 Behavioral Regulation in Exercise 3 (BREQ3) Questionnaire. *Sport, Exercise, and Performance*  
37 *Psychology [Internet].* 2023 May 18 [cited 2023 Jul 28]; Available from:  
38 <http://doi.apa.org/getdoi.cfm?doi=10.1037/spy0000321>  
39
- 40 49. Gardner B, Abraham C, Lally P, de Bruijn GJ. Towards parsimony in habit measurement:  
41 Testing the convergent and predictive validity of an automaticity subscale of the Self-Report  
42 Habit Index. *International Journal of Behavioral Nutrition and Physical Activity.* 2012 Aug  
43 30;9(1):102.  
44
- 45 50. Penseau J, Tait RI, Johnston DW, Francis JJ, Sniehotta FF. Goal conflict and goal  
46 facilitation as predictors of daily accelerometer-assessed physical activity. *Health Psychol.* 2013  
47 Dec;32(12):1179–87.  
48
- 49 51. Sniehotta FF, Schwarzer R, Scholz U, Schüz B. Action planning and coping planning for  
50 long-term lifestyle change: theory and assessment. *European Journal of Social Psychology.*  
51 2005;35(4):565–76.  
52  
53  
54  
55  
56  
57  
58  
59  
60

Figure 1. Consort diagram of participant flow through the trial



Note. Interviews not included in flow diagram as the interviews are not a part of the randomised control trial per se, but contribute to program evaluation.

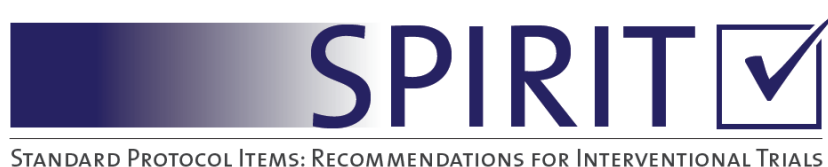

SPIRIT 2013 Checklist: Recommended items to address in a clinical trial protocol and related documents\*

| Section/item                      | Item No | Description                                                                                                                                                                                                                                                                              | Page number |
|-----------------------------------|---------|------------------------------------------------------------------------------------------------------------------------------------------------------------------------------------------------------------------------------------------------------------------------------------------|-------------|
| <b>Administrative information</b> |         |                                                                                                                                                                                                                                                                                          |             |
| Title                             | 1       | Descriptive title identifying the study design, population, interventions, and, if applicable, trial acronym                                                                                                                                                                             | 1           |
| Trial registration                | 2a      | Trial identifier and registry name. If not yet registered, name of intended registry                                                                                                                                                                                                     | 7           |
|                                   | 2b      | All items from the World Health Organization Trial Registration Data Set                                                                                                                                                                                                                 | N/A         |
| Protocol version                  | 3       | Date and version identifier                                                                                                                                                                                                                                                              | 1           |
| Funding                           | 4       | Sources and types of financial, material, and other support                                                                                                                                                                                                                              | 20          |
| Roles and responsibilities        | 5a      | Names, affiliations, and roles of protocol contributors                                                                                                                                                                                                                                  | 1, 20-21    |
|                                   | 5b      | Name and contact information for the trial sponsor                                                                                                                                                                                                                                       | N/A         |
|                                   | 5c      | Role of study sponsor and funders, if any, in study design; collection, management, analysis, and interpretation of data; writing of the report; and the decision to submit the report for publication, including whether they will have ultimate authority over any of these activities | N/A         |
|                                   | 5d      | Composition, roles, and responsibilities of the coordinating centre, steering committee, endpoint adjudication committee, data management team, and other individuals or groups overseeing the trial, if applicable (see Item 21a for data monitoring committee)                         | N/A         |
| <b>Introduction</b>               |         |                                                                                                                                                                                                                                                                                          |             |
| Background and rationale          | 6a      | Description of research question and justification for undertaking the trial, including summary of relevant studies (published and unpublished) examining benefits and harms for each intervention                                                                                       | 4-6         |
|                                   | 6b      | Explanation for choice of comparators                                                                                                                                                                                                                                                    | 16          |

|    |                                                           |     |                                                              |              |
|----|-----------------------------------------------------------|-----|--------------------------------------------------------------|--------------|
| 1  |                                                           |     |                                                              |              |
| 2  | Objectives                                                | 7   | Specific objectives or hypotheses                            | 6            |
| 3  |                                                           |     |                                                              |              |
| 4  |                                                           |     |                                                              |              |
| 5  | Trial design                                              | 8   | Description of trial design including type of trial (eg,     | 7            |
| 6  |                                                           |     | parallel group, crossover, factorial, single group),         |              |
| 7  |                                                           |     | allocation ratio, and framework (eg, superiority,            |              |
| 8  |                                                           |     | equivalence, noninferiority, exploratory)                    |              |
| 9  |                                                           |     |                                                              |              |
| 10 |                                                           |     |                                                              |              |
| 11 | <b>Methods: Participants, interventions, and outcomes</b> |     |                                                              |              |
| 12 |                                                           |     |                                                              |              |
| 13 | Study setting                                             | 9   | Description of study settings (eg, community clinic,         | 7            |
| 14 |                                                           |     | academic hospital) and list of countries where data will be  |              |
| 15 |                                                           |     | collected. Reference to where list of study sites can be     |              |
| 16 |                                                           |     | obtained                                                     |              |
| 17 |                                                           |     |                                                              |              |
| 18 | Eligibility                                               | 10  | Inclusion and exclusion criteria for participants. If        | 8-9          |
| 19 | criteria                                                  |     | applicable, eligibility criteria for study centres and       |              |
| 20 |                                                           |     | individuals who will perform the interventions (eg,          |              |
| 21 |                                                           |     | surgeons, psychotherapists)                                  |              |
| 22 |                                                           |     |                                                              |              |
| 23 |                                                           |     |                                                              |              |
| 24 | Interventions                                             | 11a | Interventions for each group with sufficient detail to allow | 10-11, 31-33 |
| 25 |                                                           |     | replication, including how and when they will be             |              |
| 26 |                                                           |     | administered                                                 |              |
| 27 |                                                           |     |                                                              |              |
| 28 |                                                           |     |                                                              |              |
| 29 |                                                           | 11b | Criteria for discontinuing or modifying allocated            | N/A          |
| 30 |                                                           |     | interventions for a given trial participant (eg, drug dose   |              |
| 31 |                                                           |     | change in response to harms, participant request, or         |              |
| 32 |                                                           |     | improving/worsening disease)                                 |              |
| 33 |                                                           |     |                                                              |              |
| 34 |                                                           | 11c | Strategies to improve adherence to intervention protocols,   | 14-15        |
| 35 |                                                           |     | and any procedures for monitoring adherence (eg, drug        |              |
| 36 |                                                           |     | tablet return, laboratory tests)                             |              |
| 37 |                                                           |     |                                                              |              |
| 38 |                                                           |     |                                                              |              |
| 39 |                                                           | 11d | Relevant concomitant care and interventions that are         | N/A          |
| 40 |                                                           |     | permitted or prohibited during the trial                     |              |
| 41 |                                                           |     |                                                              |              |
| 42 | Outcomes                                                  | 12  | Primary, secondary, and other outcomes, including the        | 13-14        |
| 43 |                                                           |     | specific measurement variable (eg, systolic blood            |              |
| 44 |                                                           |     | pressure), analysis metric (eg, change from baseline, final  |              |
| 45 |                                                           |     | value, time to event), method of aggregation (eg, median,    |              |
| 46 |                                                           |     | proportion), and time point for each outcome. Explanation    |              |
| 47 |                                                           |     | of the clinical relevance of chosen efficacy and harm        |              |
| 48 |                                                           |     | outcomes is strongly recommended                             |              |
| 49 |                                                           |     |                                                              |              |
| 50 |                                                           |     |                                                              |              |
| 51 | Participant                                               | 13  | Time schedule of enrolment, interventions (including any     | 14-15        |
| 52 | timeline                                                  |     | run-ins and washouts), assessments, and visits for           |              |
| 53 |                                                           |     | participants. A schematic diagram is highly recommended      |              |
| 54 |                                                           |     | (see Figure)                                                 |              |
| 55 |                                                           |     |                                                              |              |
| 56 |                                                           |     |                                                              |              |
| 57 |                                                           |     |                                                              |              |
| 58 |                                                           |     |                                                              |              |
| 59 |                                                           |     |                                                              |              |
| 60 |                                                           |     |                                                              |              |



|   |             |    |                                                                                                                                                                                       |      |
|---|-------------|----|---------------------------------------------------------------------------------------------------------------------------------------------------------------------------------------|------|
| 1 |             |    |                                                                                                                                                                                       |      |
| 2 | Sample size | 14 | Estimated number of participants needed to achieve study objectives and how it was determined, including clinical and statistical assumptions supporting any sample size calculations | 17   |
| 3 |             |    |                                                                                                                                                                                       |      |
| 4 |             |    |                                                                                                                                                                                       |      |
| 5 |             |    |                                                                                                                                                                                       |      |
| 6 |             |    |                                                                                                                                                                                       |      |
| 7 | Recruitment | 15 | Strategies for achieving adequate participant enrolment to reach target sample size                                                                                                   | 9-10 |
| 8 |             |    |                                                                                                                                                                                       |      |
| 9 |             |    |                                                                                                                                                                                       |      |

### Methods: Assignment of interventions (for controlled trials)

#### Allocation:

|    |                                  |     |                                                                                                                                                                                                                                                                                                                                                          |       |
|----|----------------------------------|-----|----------------------------------------------------------------------------------------------------------------------------------------------------------------------------------------------------------------------------------------------------------------------------------------------------------------------------------------------------------|-------|
| 14 | Sequence generation              | 16a | Method of generating the allocation sequence (eg, computer-generated random numbers), and list of any factors for stratification. To reduce predictability of a random sequence, details of any planned restriction (eg, blocking) should be provided in a separate document that is unavailable to those who enrol participants or assign interventions | 12-13 |
| 15 |                                  |     |                                                                                                                                                                                                                                                                                                                                                          |       |
| 16 |                                  |     |                                                                                                                                                                                                                                                                                                                                                          |       |
| 17 |                                  |     |                                                                                                                                                                                                                                                                                                                                                          |       |
| 18 |                                  |     |                                                                                                                                                                                                                                                                                                                                                          |       |
| 19 |                                  |     |                                                                                                                                                                                                                                                                                                                                                          |       |
| 20 |                                  |     |                                                                                                                                                                                                                                                                                                                                                          |       |
| 21 |                                  |     |                                                                                                                                                                                                                                                                                                                                                          |       |
| 22 |                                  |     |                                                                                                                                                                                                                                                                                                                                                          |       |
| 23 |                                  |     |                                                                                                                                                                                                                                                                                                                                                          |       |
| 24 | Allocation concealment mechanism | 16b | Mechanism of implementing the allocation sequence (eg, central telephone; sequentially numbered, opaque, sealed envelopes), describing any steps to conceal the sequence until interventions are assigned                                                                                                                                                | 13    |
| 25 |                                  |     |                                                                                                                                                                                                                                                                                                                                                          |       |
| 26 |                                  |     |                                                                                                                                                                                                                                                                                                                                                          |       |
| 27 |                                  |     |                                                                                                                                                                                                                                                                                                                                                          |       |
| 28 |                                  |     |                                                                                                                                                                                                                                                                                                                                                          |       |
| 29 |                                  |     |                                                                                                                                                                                                                                                                                                                                                          |       |
| 30 | Implementation                   | 16c | Who will generate the allocation sequence, who will enrol participants, and who will assign participants to interventions                                                                                                                                                                                                                                | 13-14 |
| 31 |                                  |     |                                                                                                                                                                                                                                                                                                                                                          |       |
| 32 |                                  |     |                                                                                                                                                                                                                                                                                                                                                          |       |
| 33 |                                  |     |                                                                                                                                                                                                                                                                                                                                                          |       |
| 34 | Blinding (masking)               | 17a | Who will be blinded after assignment to interventions (eg, trial participants, care providers, outcome assessors, data analysts), and how                                                                                                                                                                                                                | 12    |
| 35 |                                  |     |                                                                                                                                                                                                                                                                                                                                                          |       |
| 36 |                                  |     |                                                                                                                                                                                                                                                                                                                                                          |       |
| 37 |                                  |     |                                                                                                                                                                                                                                                                                                                                                          |       |
| 38 |                                  |     |                                                                                                                                                                                                                                                                                                                                                          |       |
| 39 |                                  | 17b | If blinded, circumstances under which unblinding is permissible, and procedure for revealing a participant's allocated intervention during the trial                                                                                                                                                                                                     | N/A   |
| 40 |                                  |     |                                                                                                                                                                                                                                                                                                                                                          |       |
| 41 |                                  |     |                                                                                                                                                                                                                                                                                                                                                          |       |
| 42 |                                  |     |                                                                                                                                                                                                                                                                                                                                                          |       |

### Methods: Data collection, management, and analysis

|    |                         |     |                                                                                                                                                                                                                                                                                                                                                                                                              |              |
|----|-------------------------|-----|--------------------------------------------------------------------------------------------------------------------------------------------------------------------------------------------------------------------------------------------------------------------------------------------------------------------------------------------------------------------------------------------------------------|--------------|
| 45 | Data collection methods | 18a | Plans for assessment and collection of outcome, baseline, and other trial data, including any related processes to promote data quality (eg, duplicate measurements, training of assessors) and a description of study instruments (eg, questionnaires, laboratory tests) along with their reliability and validity, if known. Reference to where data collection forms can be found, if not in the protocol | 13-16, 35-38 |
| 46 |                         |     |                                                                                                                                                                                                                                                                                                                                                                                                              |              |
| 47 |                         |     |                                                                                                                                                                                                                                                                                                                                                                                                              |              |
| 48 |                         |     |                                                                                                                                                                                                                                                                                                                                                                                                              |              |
| 49 |                         |     |                                                                                                                                                                                                                                                                                                                                                                                                              |              |
| 50 |                         |     |                                                                                                                                                                                                                                                                                                                                                                                                              |              |
| 51 |                         |     |                                                                                                                                                                                                                                                                                                                                                                                                              |              |
| 52 |                         |     |                                                                                                                                                                                                                                                                                                                                                                                                              |              |
| 53 |                         |     |                                                                                                                                                                                                                                                                                                                                                                                                              |              |
| 54 |                         |     |                                                                                                                                                                                                                                                                                                                                                                                                              |              |
| 55 |                         |     |                                                                                                                                                                                                                                                                                                                                                                                                              |              |
| 56 |                         | 18b | Plans to promote participant retention and complete follow-up, including list of any outcome data to be collected for participants who discontinue or deviate from intervention protocols                                                                                                                                                                                                                    |              |
| 57 |                         |     |                                                                                                                                                                                                                                                                                                                                                                                                              |              |
| 58 |                         |     |                                                                                                                                                                                                                                                                                                                                                                                                              |              |
| 59 |                         |     |                                                                                                                                                                                                                                                                                                                                                                                                              |              |
| 60 |                         |     |                                                                                                                                                                                                                                                                                                                                                                                                              |              |

|    |                                 |     |                                                                |       |
|----|---------------------------------|-----|----------------------------------------------------------------|-------|
| 1  |                                 |     |                                                                |       |
| 2  | Data                            | 19  | Plans for data entry, coding, security, and storage,           | 17    |
| 3  | management                      |     | including any related processes to promote data quality        |       |
| 4  |                                 |     | (eg, double data entry; range checks for data values).         |       |
| 5  |                                 |     | Reference to where details of data management                  |       |
| 6  |                                 |     | procedures can be found, if not in the protocol                |       |
| 7  |                                 |     |                                                                |       |
| 8  | Statistical                     | 20a | Statistical methods for analysing primary and secondary        | 16-17 |
| 9  | methods                         |     | outcomes. Reference to where other details of the              |       |
| 10 |                                 |     | statistical analysis plan can be found, if not in the protocol |       |
| 11 |                                 |     |                                                                |       |
| 12 |                                 |     |                                                                |       |
| 13 |                                 | 20b | Methods for any additional analyses (eg, subgroup and          | 17    |
| 14 |                                 |     | adjusted analyses)                                             |       |
| 15 |                                 |     |                                                                |       |
| 16 |                                 |     |                                                                |       |
| 17 |                                 |     |                                                                |       |
| 18 |                                 | 20c | Definition of analysis population relating to protocol non-    | 17    |
| 19 |                                 |     | adherence (eg, as randomised analysis), and any                |       |
| 20 |                                 |     | statistical methods to handle missing data (eg, multiple       |       |
| 21 |                                 |     | imputation)                                                    |       |
| 22 |                                 |     |                                                                |       |
| 23 | <b>Methods: Monitoring</b>      |     |                                                                |       |
| 24 |                                 |     |                                                                |       |
| 25 | Data                            | 21a | Composition of data monitoring committee (DMC);                | N/A   |
| 26 | monitoring                      |     | summary of its role and reporting structure; statement of      |       |
| 27 |                                 |     | whether it is independent from the sponsor and competing       |       |
| 28 |                                 |     | interests; and reference to where further details about its    |       |
| 29 |                                 |     | charter can be found, if not in the protocol. Alternatively,   |       |
| 30 |                                 |     | an explanation of why a DMC is not needed                      |       |
| 31 |                                 |     |                                                                |       |
| 32 |                                 |     |                                                                |       |
| 33 |                                 | 21b | Description of any interim analyses and stopping               | N/A   |
| 34 |                                 |     | guidelines, including who will have access to these interim    |       |
| 35 |                                 |     | results and make the final decision to terminate the trial     |       |
| 36 |                                 |     |                                                                |       |
| 37 |                                 |     |                                                                |       |
| 38 | Harms                           | 22  | Plans for collecting, assessing, reporting, and managing       | 18    |
| 39 |                                 |     | solicited and spontaneously reported adverse events and        |       |
| 40 |                                 |     | other unintended effects of trial interventions or trial       |       |
| 41 |                                 |     | conduct                                                        |       |
| 42 |                                 |     |                                                                |       |
| 43 | Auditing                        | 23  | Frequency and procedures for auditing trial conduct, if        | N/A   |
| 44 |                                 |     | any, and whether the process will be independent from          |       |
| 45 |                                 |     | investigators and the sponsor                                  |       |
| 46 |                                 |     |                                                                |       |
| 47 |                                 |     |                                                                |       |
| 48 | <b>Ethics and dissemination</b> |     |                                                                |       |
| 49 |                                 |     |                                                                |       |
| 50 | Research                        | 24  | Plans for seeking research ethics committee/institutional      | 18-19 |
| 51 | ethics                          |     | review board (REC/IRB) approval                                |       |
| 52 | approval                        |     |                                                                |       |
| 53 |                                 |     |                                                                |       |
| 54 | Protocol                        | 25  | Plans for communicating important protocol modifications       | 16    |
| 55 | amendments                      |     | (eg, changes to eligibility criteria, outcomes, analyses) to   |       |
| 56 |                                 |     | relevant parties (eg, investigators, REC/IRBs, trial           |       |
| 57 |                                 |     | participants, trial registries, journals, regulators)          |       |
| 58 |                                 |     |                                                                |       |
| 59 |                                 |     |                                                                |       |
| 60 |                                 |     |                                                                |       |

|    |                   |     |                                                                 |       |
|----|-------------------|-----|-----------------------------------------------------------------|-------|
| 1  |                   |     |                                                                 |       |
| 2  | Consent or        | 26a | Who will obtain informed consent or assent from potential       | 14    |
| 3  | assent            |     | trial participants or authorised surrogates, and how (see       |       |
| 4  |                   |     | Item 32)                                                        |       |
| 5  |                   |     |                                                                 |       |
| 6  |                   | 26b | Additional consent provisions for collection and use of         | N/A   |
| 7  |                   |     | participant data and biological specimens in ancillary          |       |
| 8  |                   |     | studies, if applicable                                          |       |
| 9  |                   |     |                                                                 |       |
| 10 | Confidentiality   | 27  | How personal information about potential and enrolled           | 14-16 |
| 11 |                   |     | participants will be collected, shared, and maintained in       |       |
| 12 |                   |     | order to protect confidentiality before, during, and after the  |       |
| 13 |                   |     | trial                                                           |       |
| 14 |                   |     |                                                                 |       |
| 15 |                   |     |                                                                 |       |
| 16 | Declaration of    | 28  | Financial and other competing interests for principal           | 21    |
| 17 | interests         |     | investigators for the overall trial and each study site         |       |
| 18 |                   |     |                                                                 |       |
| 19 | Access to data    | 29  | Statement of who will have access to the final trial dataset,   | 18    |
| 20 |                   |     | and disclosure of contractual agreements that limit such        |       |
| 21 |                   |     | access for investigators                                        |       |
| 22 |                   |     |                                                                 |       |
| 23 |                   |     |                                                                 |       |
| 24 | Ancillary and     | 30  | Provisions, if any, for ancillary and post-trial care, and for  | N/A   |
| 25 | post-trial care   |     | compensation to those who suffer harm from trial                |       |
| 26 |                   |     | participation                                                   |       |
| 27 |                   |     |                                                                 |       |
| 28 | Dissemination     | 31a | Plans for investigators and sponsor to communicate trial        | 19    |
| 29 | policy            |     | results to participants, healthcare professionals, the          |       |
| 30 |                   |     | public, and other relevant groups (eg, via publication,         |       |
| 31 |                   |     | reporting in results databases, or other data sharing           |       |
| 32 |                   |     | arrangements), including any publication restrictions           |       |
| 33 |                   |     |                                                                 |       |
| 34 |                   |     |                                                                 |       |
| 35 |                   | 31b | Authorship eligibility guidelines and any intended use of       | N/A   |
| 36 |                   |     | professional writers                                            |       |
| 37 |                   |     |                                                                 |       |
| 38 |                   | 31c | Plans, if any, for granting public access to the full protocol, | N/A   |
| 39 |                   |     | participant-level dataset, and statistical code                 |       |
| 40 |                   |     |                                                                 |       |
| 41 |                   |     |                                                                 |       |
| 42 | <b>Appendices</b> |     |                                                                 |       |
| 43 |                   |     |                                                                 |       |
| 44 | Informed          | 32  | Model consent form and other related documentation              | N/A   |
| 45 | consent           |     | given to participants and authorised surrogates                 |       |
| 46 | materials         |     |                                                                 |       |
| 47 |                   |     |                                                                 |       |
| 48 | Biological        | 33  | Plans for collection, laboratory evaluation, and storage of     | N/A   |
| 49 | specimens         |     | biological specimens for genetic or molecular analysis in       |       |
| 50 |                   |     | the current trial and for future use in ancillary studies, if   |       |
| 51 |                   |     | applicable                                                      |       |
| 52 |                   |     |                                                                 |       |
| 53 |                   |     |                                                                 |       |

\*It is strongly recommended that this checklist be read in conjunction with the SPIRIT 2013 Explanation & Elaboration for important clarification on the items. Amendments to the protocol should be tracked and dated. The SPIRIT checklist is copyrighted by the SPIRIT Group under the Creative Commons "[Attribution-NonCommercial-NoDerivs 3.0 Unported](https://creativecommons.org/licenses/by-nc-nd/3.0/)" license.

Supplementary File 2.

Standards for Reporting Implementation Studies: the StaRI checklist for completion

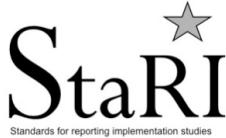

The StaRI standard should be referenced as: Pinnock H, Barwick M, Carpenter C, Eldridge S, Grandes G, Griffiths CJ, Rycroft-Malone J, Meissner P, Murray E, Patel A, Sheikh A, Taylor SJC for the StaRI Group. Standards for Reporting Implementation Studies (StaRI) statement. BMJ 2017;356:i6795

The detailed Explanation and Elaboration document, which provides the rationale and exemplar text for all these items is: Pinnock H, Barwick M, Carpenter C, Eldridge S, Grandes G, Griffiths C, Rycroft-Malone J, Meissner P, Murray E, Patel A, Sheikh A, Taylor S, for the StaRI group. Standards for Reporting Implementation Studies (StaRI) Explanation and Elaboration document. BMJ Open 2017 2017;7:e013318

Notes: A key concept of the StaRI standards is the dual strands of describing, on the one hand, the implementation strategy and, on the other, the clinical, healthcare, or public health intervention that is being implemented. These strands are represented as two columns in the checklist.

The primary focus of implementation science is the implementation strategy (column 1) and the expectation is that this will always be completed. The evidence about the impact of the intervention on the targeted population should always be considered (column 2) and either health outcomes reported or robust evidence cited to support a known beneficial effect of the intervention on the health of individuals or populations.

The StaRI standards refers to the broad range of study designs employed in implementation science. Authors should refer to other reporting standards for advice on reporting specific methodological features. Conversely, whilst all items are worthy of consideration, not all items will be applicable to, or feasible within every study.

Table with 5 columns: Checklist item, Reported on page #, Implementation Strategy, Reported on page #, Intervention. Rows include Title and abstract, Title, Abstract, and Introduction.

|                             |    |       |                                                                                                                                                                                                 |       |                                                                                                                                                                            |
|-----------------------------|----|-------|-------------------------------------------------------------------------------------------------------------------------------------------------------------------------------------------------|-------|----------------------------------------------------------------------------------------------------------------------------------------------------------------------------|
| Rationale                   | 4  | 5-6   | The scientific background and rationale for the implementation strategy (including any underpinning theory/framework/model, how it is expected to achieve its effects and any pilot work).      | 5-6   | The scientific background and rationale for the intervention being implemented (including evidence about its effectiveness and how it is expected to achieve its effects). |
| Aims and objectives         | 5  | 6     | The aims of the study, differentiating between implementation objectives and any intervention objectives.                                                                                       |       |                                                                                                                                                                            |
| <b>Methods: description</b> |    |       |                                                                                                                                                                                                 |       |                                                                                                                                                                            |
| Design                      | 6  | 7     | The design and key features of the evaluation, (cross referencing to any appropriate methodology reporting standards) and any changes to study protocol, with reasons                           |       |                                                                                                                                                                            |
| Context                     | 7  | 7     | The context in which the intervention was implemented. (Consider social, economic, policy, healthcare, organisational barriers and facilitators that might influence implementation elsewhere). |       |                                                                                                                                                                            |
| Targeted 'sites'            | 8  | 7-9   | The characteristics of the targeted 'site(s)' (e.g locations/personnel/resources etc.) for implementation and any eligibility criteria.                                                         | 7-9   | The population targeted by the intervention and any eligibility criteria.                                                                                                  |
| Description                 | 9  | 11-12 | A description of the implementation strategy                                                                                                                                                    | 10-11 | A description of the intervention                                                                                                                                          |
| Sub-groups                  | 10 | n/a   | Any sub-groups recruited for additional research tasks, and/or nested studies are described                                                                                                     |       |                                                                                                                                                                            |
| <b>Methods: evaluation</b>  |    |       |                                                                                                                                                                                                 |       |                                                                                                                                                                            |
| Outcomes                    | 11 | 13-14 | Defined pre-specified primary and other outcome(s) of the implementation strategy, and how they were assessed. Document any pre-determined targets                                              | 13-14 | Defined pre-specified primary and other outcome(s) of the intervention (if assessed), and how they were assessed. Document any pre-determined targets                      |
| Process evaluation          | 12 | n/a   | Process evaluation objectives and outcomes related to the mechanism by which the strategy is expected to work                                                                                   |       |                                                                                                                                                                            |
| Economic evaluation         | 13 | 17-18 | Methods for resource use, costs, economic outcomes and analysis for the implementation strategy                                                                                                 | 17-18 | Methods for resource use, costs, economic outcomes and analysis for the intervention                                                                                       |
| Sample size                 | 14 | 17    | Rationale for sample sizes (including sample size calculations, budgetary constraints, practical considerations, data saturation, as appropriate)                                               |       |                                                                                                                                                                            |
| Analysis                    | 15 | 16-17 | Methods of analysis (with reasons for that choice)                                                                                                                                              |       |                                                                                                                                                                            |

|                       |    |                |                                                                                                                                                                                                                                           |                |                                                                                                                         |
|-----------------------|----|----------------|-------------------------------------------------------------------------------------------------------------------------------------------------------------------------------------------------------------------------------------------|----------------|-------------------------------------------------------------------------------------------------------------------------|
| Sub-group analyses    | 16 | 17             | Any a priori sub-group analyses (e.g. between different sites in a multicentre study, different clinical or demographic populations), and sub-groups recruited to specific nested research tasks                                          |                |                                                                                                                         |
| <b>Results</b>        |    |                |                                                                                                                                                                                                                                           |                |                                                                                                                         |
| Characteristics       | 17 | n/a – protocol | Proportion recruited and characteristics of the recipient population for the implementation strategy                                                                                                                                      | n/a – protocol | Proportion recruited and characteristics (if appropriate) of the recipient population for the intervention              |
| Outcomes              | 18 | n/a – protocol | Primary and other outcome(s) of the implementation strategy                                                                                                                                                                               | n/a – protocol | Primary and other outcome(s) of the Intervention (if assessed)                                                          |
| Process outcomes      | 19 | n/a – protocol | Process data related to the implementation strategy mapped to the mechanism by which the strategy is expected to work                                                                                                                     |                |                                                                                                                         |
| Economic evaluation   | 20 | n/a – protocol | Resource use, costs, economic outcomes and analysis for the implementation strategy                                                                                                                                                       | n/a – protocol | Resource use, costs, economic outcomes and analysis for the intervention                                                |
| Sub-group analyses    | 21 | n/a – protocol | Representativeness and outcomes of subgroups including those recruited to specific research tasks                                                                                                                                         |                |                                                                                                                         |
| Fidelity/adaptation   | 22 | n/a – protocol | Fidelity to implementation strategy as planned and adaptation to suit context and preferences                                                                                                                                             | n/a – protocol | Fidelity to delivering the core components of intervention (where measured)                                             |
| Contextual changes    | 23 | n/a – protocol | Contextual changes (if any) which may have affected outcomes                                                                                                                                                                              |                |                                                                                                                         |
| Harms                 | 24 | n/a – protocol | All important harms or unintended effects in each group                                                                                                                                                                                   |                |                                                                                                                         |
| <b>Discussion</b>     |    |                |                                                                                                                                                                                                                                           |                |                                                                                                                         |
| Structured discussion | 25 | N/A            | Summary of findings, strengths and limitations, comparisons with other studies, conclusions and implications                                                                                                                              |                |                                                                                                                         |
| Implications          | 26 | n/a – protocol | Discussion of policy, practice and/or research implications of the implementation strategy (specifically including scalability)                                                                                                           | n/a – protocol | Discussion of policy, practice and/or research implications of the intervention (specifically including sustainability) |
| <b>General</b>        |    |                |                                                                                                                                                                                                                                           |                |                                                                                                                         |
| Statements            | 27 | 20-21          | Include statement(s) on regulatory approvals (including, as appropriate, ethical approval, confidential use of routine data, governance approval), trial/study registration (availability of protocol), funding and conflicts of interest |                |                                                                                                                         |

1  
2  
3  
4  
5  
6  
7  
8  
9  
10  
11  
12  
13  
14  
15  
16  
17  
18  
19  
20  
21  
22  
23  
24  
25  
26  
27  
28  
29  
30  
31  
32  
33  
34  
35  
36  
37  
38  
39  
40  
41  
42  
43  
44  
45  
46

For peer review only
