# Supplementary material for: Scale-up of the Australian Fans in Training (Aussie-FIT) men’s health behaviour change program: a protocol for a randomised controlled hybrid effectiveness–implementation trial
Source: PubMed Central journal article supplement — BMJ Open. 2023 Oct 25;13(10):e078302. doi: 10.1136/bmjopen-2023-078302 (PMC10603488; doi:10.1136/bmjopen-2023-078302), 2023-10-25
Supplement: bmjopen-2023-078302.reviewer_comments.pdf [file bmjopen-2023-078302.reviewer_comments.pdf]

## PEER REVIEW HISTORY

BMJ Open publishes all reviews undertaken for accepted manuscripts. Reviewers are asked to complete a checklist review form (<http://bmjopen.bmj.com/site/about/resources/checklist.pdf>) and are provided with free text boxes to elaborate on their assessment. These free text comments are reproduced below.

## ARTICLE DETAILS

|                            |                                                                                                                                                                                                                                                                                                                                                        |
|----------------------------|--------------------------------------------------------------------------------------------------------------------------------------------------------------------------------------------------------------------------------------------------------------------------------------------------------------------------------------------------------|
| <b>TITLE (PROVISIONAL)</b> | Scale-up of the Australian Fans in Training (Aussie-FIT) men's health behaviour change program: Protocol for a randomised controlled hybrid effectiveness-implementation trial.                                                                                                                                                                        |
| <b>AUTHORS</b>             | McDonald, Matthew; Brickley, Bryce; Pavey, Toby; Smith, James A; Maiorana, Andrew; McCaffrey, Tracy; Hillis, Graham; Bonson, Jason; Chih, HuiJun; Gupta, Himanshu; Holmes, Scarlett; Hunt, Kate; Kerr, Deborah; Kwaśnicka, Dominika; Makate, Marshall; McVeigh, Joanne; Moullin, Joanna; Smith, Brendan; Wharton, Lee; Wharton, Neil; Quested, Eleanor |

This article was not externally reviewed at BMJ Open. Protocols that have been independently assessed prior to submission to BMJ Open are usually fast-tracked to publication on the grounds that further substantial changes will not be possible. This independent assessment will usually be external, independent review for both a substantial grant award from a non-commercial or government funder and ethics approval.
